# Supplementary material for: High throughput 16SrRNA gene sequencing reveals the correlation between Propionibacterium acnes and sarcoidosis
Source: Respir Res. 2017 Feb 1;18:28. doi: 10.1186/s12931-017-0515-z (PMC5286795; doi:10.1186/s12931-017-0515-z)
Supplement: Additional file 1: Table S1. — Sequencing data of the 36 tissue speciments. (XLS 15 kb) [file 12931_2017_515_MOESM1_ESM.xls]

## Sheet: Sheet1
Additional file 1:Table S1 Sequencing data of the 36 tissue speciments
LN1.1-LN1.17: 17 samples of the Sarcoidosis group
LN2.1-LN2.11: 11 samples of the Control group
LN3.1-LN3.8: 8 samples of the Tuberculosis group
#SampleID	Raw PE(#)	Raw Tags(#)	Clean Tags(#)	Effective Tags(#)	Base (nt)	AvgLen (nt)	V4-16S rRNA Illumina barcode sequence	V4-16S rRNA Illumina Linker primer sequence
LN1.1	27170	25759	25605	24219	6134781	253	CGTACG,AGTCAA	GTGCCAGCMGCCGCGGTAA,GGACTACHVGGGTWTCTAAT
LN1.2	30937	29243	29114	27821	7048078	253	CGTACG,AGTTCC	GTGCCAGCMGCCGCGGTAA,GGACTACHVGGGTWTCTAAT
LN1.3	25978	24668	24329	23276	5889401	253	CGTACG,ATGTCA	GTGCCAGCMGCCGCGGTAA,GGACTACHVGGGTWTCTAAT
LN1.4	17720	16767	16712	16033	4055063	253	CGTACG,CCGTCC	GTGCCAGCMGCCGCGGTAA,GGACTACHVGGGTWTCTAAT
LN1.5	22453	21272	20684	20184	5107225	253	CGTACG,GTAGAG	GTGCCAGCMGCCGCGGTAA,GGACTACHVGGGTWTCTAAT
LN1.6	23134	21837	21628	20831	5272289	253	CGTACG,GTCCGC	GTGCCAGCMGCCGCGGTAA,GGACTACHVGGGTWTCTAAT
LN1.7	29856	28356	28245	27048	6845174	253	CGTACG,GTGAAA	GTGCCAGCMGCCGCGGTAA,GGACTACHVGGGTWTCTAAT
LN1.8	49925	47089	46435	45361	11476074	253	CGTACG,GTGGCC	GTGCCAGCMGCCGCGGTAA,GGACTACHVGGGTWTCTAAT
LN1.9	40096	37797	37687	36367	9203223	253	CGTACG,GGCCTG	GTGCCAGCMGCCGCGGTAA,GGACTACHVGGGTWTCTAAT
LN1.10	30394	28834	28552	27261	6899250	253	CGTACG,TTACTG	GTGCCAGCMGCCGCGGTAA,GGACTACHVGGGTWTCTAAT
LN1.11	21357	20294	20073	19297	4884214	253	CGTACG,TCAAGT	GTGCCAGCMGCCGCGGTAA,GGACTACHVGGGTWTCTAAT
LN1.12	56296	53089	52855	50010	12660298	253	CGTACG,AGCAGT	GTGCCAGCMGCCGCGGTAA,GGACTACHVGGGTWTCTAAT
LN1.13	27803	26538	26447	25733	6511846	253	GGTAGC,ATCACG	GTGCCAGCMGCCGCGGTAA,GGACTACHVGGGTWTCTAAT
LN1.14	30984	27906	27372	25496	6477957	254	GTTTCG,AGTCAA	GTGCCAGCMGCCGCGGTAA,GGACTACHVGGGTWTCTAAT
LN1.15	34447	32106	31884	29995	7612372	254	GTTTCG,AGTTCC	GTGCCAGCMGCCGCGGTAA,GGACTACHVGGGTWTCTAAT
LN1.16	16466	14513	14065	12648	3240461	256	ACTGAT,TCAAGT	GTGCCAGCMGCCGCGGTAA,GGACTACHVGGGTWTCTAAT
LN1.17	32482	28449	27807	25697	6531722	254	ACTGAT,AGCAGT	GTGCCAGCMGCCGCGGTAA,GGACTACHVGGGTWTCTAAT
LN2.1	58831	57922	54093	42470	10730117	253	GGTAGC,ATCACG	GTGCCAGCMGCCGCGGTAA,GGACTACHVGGGTWTCTAAT
LN2.2	47112	46009	44902	42462	10737793	253	GGTAGC,CGATGT	GTGCCAGCMGCCGCGGTAA,GGACTACHVGGGTWTCTAAT
LN2.3	43174	42256	38408	35261	8920874	253	GGTAGC,TTAGGC	GTGCCAGCMGCCGCGGTAA,GGACTACHVGGGTWTCTAAT
LN2.4	44545	43614	35076	27320	6906471	253	GGTAGC,TGACCA	GTGCCAGCMGCCGCGGTAA,GGACTACHVGGGTWTCTAAT
LN2.5	53021	51846	51694	45884	10102227	220	GGTAGC,ACAGTG	GTGCCAGCMGCCGCGGTAA,GGACTACHVGGGTWTCTAAT
LN2.6	48331	47029	40759	35497	8973258	253	GGTAGC,GCCAAT	GTGCCAGCMGCCGCGGTAA,GGACTACHVGGGTWTCTAAT
LN2.7	48110	46726	45501	43120	10906440	253	GGTAGC,CAGATC	GTGCCAGCMGCCGCGGTAA,GGACTACHVGGGTWTCTAAT
LN2.8	52122	51211	47803	46291	11705863	253	GGTAGC,ACTTGA	GTGCCAGCMGCCGCGGTAA,GGACTACHVGGGTWTCTAAT
LN2.9	53399	52242	48691	46775	11824627	253	GGTAGC,GATCAG	GTGCCAGCMGCCGCGGTAA,GGACTACHVGGGTWTCTAAT
LN2.10	54896	54031	50377	47851	12080945	252	GGTAGC,TAGCTT	GTGCCAGCMGCCGCGGTAA,GGACTACHVGGGTWTCTAAT
LN2.11	54507	53389	44880	41660	10528470	253	GGTAGC,GGCTAC	GTGCCAGCMGCCGCGGTAA,GGACTACHVGGGTWTCTAAT
LN3.1	53044	51907	51811	50102	12322642	246	GGTAGC,CTTGTA	GTGCCAGCMGCCGCGGTAA,GGACTACHVGGGTWTCTAAT
LN3.2	45291	44569	40386	38629	9587527	248	GGTAGC,AGTCAA	GTGCCAGCMGCCGCGGTAA,GGACTACHVGGGTWTCTAAT
LN3.3	58412	57412	54895	50475	12755508	253	GGTAGC,AGTTCC	GTGCCAGCMGCCGCGGTAA,GGACTACHVGGGTWTCTAAT
LN3.4	42703	42007	41922	40172	9744161	243	GGTAGC,ATGTCA	GTGCCAGCMGCCGCGGTAA,GGACTACHVGGGTWTCTAAT
LN3.5	58193	56999	48544	46595	11775925	253	GGTAGC,CCGTCC	GTGCCAGCMGCCGCGGTAA,GGACTACHVGGGTWTCTAAT
LN3.6	43348	42652	36315	33903	8568465	253	GGTAGC,GTAGAG	GTGCCAGCMGCCGCGGTAA,GGACTACHVGGGTWTCTAAT
LN3.7	57644	56594	37367	30279	7655315	253	GGTAGC,GTCCGC	GTGCCAGCMGCCGCGGTAA,GGACTACHVGGGTWTCTAAT
LN3.8	46338	45505	41476	40112	10141802	253	GGTAGC,GTGAAA	GTGCCAGCMGCCGCGGTAA,GGACTACHVGGGTWTCTAAT

## Sheet: Sheet2
Sample Name	Raw PE(#)	Raw Tags(#)	Clean Tags(#)	Effective Tags(#)	Base(nt)	AvgLen(nt)
LN1.1	27170	25759	25605	24219	6134781	253
LN1.2	30937	29243	29114	27821	7048078	253
LN1.3	25978	24668	24329	23276	5889401	253
LN1.4	17720	16767	16712	16033	4055063	253
LN1.5	22453	21272	20684	20184	5107225	253
LN1.6	23134	21837	21628	20831	5272289	253
LN1.7	29856	28356	28245	27048	6845174	253
LN1.8	49925	47089	46435	45361	11476074	253
LN1.9	40096	37797	37687	36367	9203223	253
LN1.10	30394	28834	28552	27261	6899250	253
LN1.11	21357	20294	20073	19297	4884214	253
LN1.12	56296	53089	52855	50010	12660298	253
LN1.13	27803	26538	26447	25733	6511846	253
LN1.14	30984	27906	27372	25496	6477957	254
LN1.15	34447	32106	31884	29995	7612372	254
LN1.16	16466	14513	14065	12648	3240461	256
LN1.17	32482	28449	27807	25697	6531722	254
LN2.1	58831	57922	54093	42470	10730117	253
LN2.2	47112	46009	44902	42462	10737793	253
LN2.3	43174	42256	38408	35261	8920874	253
LN2.4	44545	43614	35076	27320	6906471	253
LN2.5	53021	51846	51694	45884	10102227	220
LN2.6	48331	47029	40759	35497	8973258	253
LN2.7	48110	46726	45501	43120	10906440	253
LN2.8	52122	51211	47803	46291	11705863	253
LN2.9	53399	52242	48691	46775	11824627	253
LN2.10	54896	54031	50377	47851	12080945	252
LN2.11	54507	53389	44880	41660	10528470	253
LN3.1	53044	51907	51811	50102	12322642	246
LN3.2	45291	44569	40386	38629	9587527	248
LN3.3	58412	57412	54895	50475	12755508	253
LN3.4	42703	42007	41922	40172	9744161	243
LN3.5	58193	56999	48544	46595	11775925	253
LN3.6	43348	42652	36315	33903	8568465	253
LN3.7	57644	56594	37367	30279	7655315	253
LN3.8	46338	45505	41476	40112	10141802	253
