# Supplementary material for: High throughput 16SrRNA gene sequencing reveals the correlation between Propionibacterium acnes and sarcoidosis
Source: Respir Res. 2017 Feb 1;18:28. doi: 10.1186/s12931-017-0515-z (PMC5286795; doi:10.1186/s12931-017-0515-z)
Supplement: Additional file 4: Table S4. — Relative abundance of the 545 bacterial genera in each sample. (XLS 330 kb) [file 12931_2017_515_MOESM4_ESM.xls]

## Sheet: Sheet1
Additional file 4: Table S4 Relative abundance of the 545 bacterial genera in each sample
			LN1.1-LN1.17: 17 samples of the Sarcoidosis group															LN2.1-LN2.11: 11 samples of the Control group											LN3.1-LN3.8: 8 samples of the Tuberculosis group
genera	LN1.1	LN1.2	LN1.3	LN1.4	LN1.5	LN1.6	LN1.7	LN1.8	LN1.9	LN1.10	LN1.11	LN1.12	LN1.13	LN1.14	LN1.15	LN1.16	LN1.17	LN2.1	LN2.2	LN2.3	LN2.4	LN2.5	LN2.6	LN2.7	LN2.8	LN2.9	LN2.10	LN2.11	LN3.1	LN3.2	LN3.3	LN3.4	LN3.5	LN3.6	LN3.7	LN3.8
k__Bacteria;p__Actinobacteria;c__Actinobacteria;o__Bifidobacteriales;f__Bifidobacteriaceae;g__Bifidobacterium;	0.00181891	0.000384971	0.00200073	0.000719613	0.00015282	0.00115998	0.000507357	0	0.00105669	0.000115973	0.000271843	0.0066768	0.00024139	0.00648319	0.000761946	0.00632264	0.292324	0.000194128	0.00422098	0.000760255	0.000542383	0.00018031	0.000999727	0.000370599	0.00160539	0.000694351	0.000238793	0.000604763	0.000338954	0.000270029	0.000246848	5.3e-05	0.000208478	0.00021561	0.000617486	0.000421896
k__Bacteria;p__Bacteroidetes;c__Bacteroidia;o__Bacteroidales;f__Bacteroidaceae;g__Bacteroides;	0.00102036	0.00207884	0.0014096	0.000392516	0.000815037	0.00332863	0.00476135	0.000383254	0.000571184	0.000309262	0.000108737	0.00132214	4.02e-05	0.000944571	0.00156018	0.00055788	0.00132564	0.173235	0.176561	0.0887515	0.131373	0.100726	0.110121	0.126844	0.128684	0.148905	0.125388	0.133728	0.160135	0.106797	0.179643	0.122359	0.155293	0.158566	0.0787476	0.104446
k__Bacteria;p__Proteobacteria;c__Gammaproteobacteria;o__Pseudomonadales;f__Moraxellaceae;g__Acinetobacter;	0.0264851	0.0161303	0.0051837	0.00399058	0.00631654	0.00721202	0.00940561	0.00482449	0.00645438	0.168123	0.0346327	0.0187523	0.0803025	0.0255463	0.016654	0.106276	0.025743	0.00288765	0.00280571	0.00644564	0.00352549	0.00182564	0.00305977	0.00269302	0.00344013	0.00338216	0.00507978	0.00284742	0.00334717	0.00561661	0.00479296	0.00381791	0.0041464	0.004343	0.00581163	0.0264213
k__Bacteria;p__Proteobacteria;c__Gammaproteobacteria;o__Alteromonadales;f__Shewanellaceae;g__Shewanella;	0.0480458	0.0537804	0.114542	0.0638493	0.0808415	0.0909824	0.107208	0.154992	0.122976	0.0705118	0.153102	0.0397082	0.0765208	0.0176463	0.0217336	0.0239888	0.00538807	2.43e-05	7.45e-05	0.0003636	3.87e-05	0.000157771	0.000121179	7.41e-05	0.000481618	6.72e-05	4.34e-05	5.04e-05	2.12e-05	0.000162018	6.17e-05	0.000212106	0.000115821	9.24e-05	0.000363227	2.64e-05
k__Bacteria;p__Fusobacteria;c__Fusobacteria;o__Fusobacteriales;f__Fusobacteriaceae;g__J2-29;	0	3.85e-05	0	0	0	0	0	0	0	0	0	0	0	0	7.26e-05	0	0	0.106867	0.0266915	0.0329224	0.0307221	0.0405247	0.0147536	0.027202	0.0372681	0.0615509	0.138782	0.0632481	0.0818787	0.0971026	0.121346	0.0892966	0.0952282	0.105772	0.0512876	0.0709577
k__Bacteria;p__Firmicutes;c__Bacilli;o__Lactobacillales;f__Lactobacillaceae;g__Lactobacillus;	0.0504414	0.0216739	0.00459258	0.00189716	0.00269981	0.00675812	0.0106935	0.00162319	0.00302727	0.00502551	0.00288153	0.0503735	0.0142823	0.119231	0.0650194	0.0347745	0.125208	0.00167435	0.00754811	0.00337157	0.00530761	0.00144248	0.00369596	0.00442248	0.00550421	0.0107288	0.00299577	0.003175	0.00468181	0.00121513	0.00115196	0.00116658	0.00152884	0.000954845	0.00145291	0.00226769
k__Bacteria;p__Proteobacteria;c__Alphaproteobacteria;o__Rhizobiales;f__Methylobacteriaceae;g__Methylobacterium;	0.00186327	0.00150139	0.000500182	0.000327097	0.000916917	0.00105911	0.000234165	0.000293077	0.00208482	0.000502551	0.000869896	0.00141028	0.000885098	0.00154566	0.00239469	0.00111576	0.000555912	0.108978	0.0150466	0.0207252	0.118201	0.0553327	0.057045	0.0113156	0.00843979	0.0116472	0.0229458	0.0219982	0.00942717	0.0206573	0.0414087	0.0174987	0.0160296	0.0279061	0.0950928	0.00899167
k__Bacteria;p__Cyanobacteria;c__Synechococcophycideae;o__Synechococcales;f__Synechococcaceae;g__Prochlorococcus;	0.0592698	0.0362642	0.00604765	0.00503729	0.00764098	0.00685899	0.0437888	0.0068084	0.0150221	0.0309649	0.0116892	0.112492	0.00808658	0.00991799	0.0066761	0.0009298	0.0124866	7.28e-05	7.45e-05	0.000198327	7.75e-05	9.02e-05	0	9.88e-05	0.00119258	0.000156789	0.00028221	2.52e-05	0.000127108	0.00253828	0.00220106	0.000954477	0.000718091	0.000154007	7.26e-05	0.000421896
k__Bacteria;p__Proteobacteria;c__Gammaproteobacteria;o__Pseudomonadales;f__Pseudomonadaceae;g__Pseudomonas;	0.0212058	0.0441176	0.0319662	0.0942693	0.0266415	0.0774662	0.0107716	0.026918	0.0368985	0.0834235	0.0293046	0.0253851	0.0781703	0.0534971	0.0690468	0.018689	0.00637161	0.00104344	0.00111732	0.00195022	0.000968542	0.000879012	0.000878548	0.00103768	0.00252276	0.00111992	0.00125909	0.000932342	0.00108042	0.00153917	0.00164565	0.0010075	0.00180681	0.00110885	0.00236097	0.00337517
k__Bacteria;p__Bacteroidetes;c__Bacteroidia;o__Bacteroidales;f__Prevotellaceae;g__Prevotella;	0.001464	0.00246381	0.0155966	0.00353264	0.00106974	0.00287472	0.00105374	0.00051852	0.00542625	0.000386578	0.000543685	0.000484784	0.00185066	0.00446524	0.00105221	0.00074384	0.000513149	0.0262558	0.0762011	0.0778105	0.0284751	0.0216372	0.0205096	0.0511674	0.0748572	0.0897729	0.0335179	0.067305	0.050716	0.0150136	0.0323782	0.0178169	0.0413945	0.017218	0.0250627	0.0204356
k__Bacteria;p__Firmicutes;c__Bacilli;o__Bacillales;f__Paenibacillaceae;g__Paenibacillus;	0.001464	0.00142439	0.000500182	0.0889703	0.000458459	0.000958241	0.0019904	0.000450887	0.000314151	0.000657183	0.000978633	0.00118993	0	0.00025761	0.000326548	0.00027894	4.28e-05	9.71e-05	9.93e-05	0.0003636	0.000116225	0	3.03e-05	0.000123533	0.000114671	0.000179187	6.51e-05	0.000100794	0.000148293	2.7e-05	0.000143994	0	0.00016215	3.08e-05	0.000145291	0.000158211
k__Bacteria;p__Firmicutes;c__Clostridia;o__Clostridiales;f__Ruminococcaceae;g__Oscillospira;	0.00110909	0.0012704	0.000863951	0	0.00132444	0.00317732	0.00214651	9.02e-05	0.00102813	0.000889129	0.000271843	0.00105771	0.000885098	0.00261904	0.00185044	0.00065086	0.00166774	0.017423	0.0420857	0.0113047	0.0487758	0.0176028	0.0608016	0.0677949	0.0235993	0.0333513	0.0141539	0.0328336	0.0130286	0.00575163	0.00423755	0.00357929	0.00486449	0.00563667	0.00326904	0.00582744
k__Bacteria;p__Firmicutes;c__Clostridia;o__Clostridiales;f__Lachnospiraceae;g__Roseburia;	0.000975999	0.000615953	9.09e-05	0.000130839	0.000407519	0.000302602	0.00136596	0.000631242	0.000428388	0.000115973	5.44e-05	8.81e-05	4.02e-05	0.00274784	0.000943362	0.00027894	8.55e-05	0.0196797	0.0667412	0.0118335	0.01755	0.0118329	0.0291436	0.0636936	0.0162603	0.0339784	0.013481	0.0438705	0.0110796	0.00664272	0.0069323	0.00607153	0.00574473	0.00649911	0.00523047	0.00820061
k__Bacteria;p__Firmicutes;c__Clostridia;o__Clostridiales;f__Ruminococcaceae;g__Ruminococcus;	0.00496872	0.00665999	0.0037741	0.000719613	0.000305639	0.00211822	0.00183429	0.000811597	0.00388405	0.00119839	0.000978633	0.00182896	0.00120695	0.013911	0.0122274	0.0018596	0.00290785	0.0159427	0.0520919	0.0100816	0.0426158	0.013681	0.045018	0.0363187	0.0182327	0.0144918	0.0204494	0.0224518	0.0171596	0.00950504	0.00732314	0.00657528	0.00664814	0.00739235	0.00650176	0.0100728
k__Bacteria;p__Bacteroidetes;c__Bacteroidia;o__Bacteroidales;f__[Paraprevotellaceae];g__[Prevotella];	0.000133091	0	9.09e-05	0.00163548	0.000560338	0.00040347	0	2.25e-05	0.000257033	7.73e-05	0	4.41e-05	8.05e-05	0.00017174	0.000217699	0	0.0003421	0.0393594	0.0310118	0.0300466	0.0423059	0.0217724	0.0140265	0.0216924	0.0321996	0.0399588	0.0273527	0.0479022	0.0426871	0.0229525	0.0462839	0.0263542	0.0385684	0.0300622	0.0230649	0.0300601
k__Bacteria;p__Proteobacteria;c__Betaproteobacteria;o__Rhodocyclales;f__Rhodocyclaceae;g__Methyloversatilis;	0.000133091	0.000346474	0.00254638	0.000523355	5.09e-05	0.000252169	0.00015611	6.76e-05	0.000428388	0.000231947	0.000652422	0.00035257	0.000281622	0.00017174	0.000290265	0.00427708	0.0003421	0.00177141	0.00332713	0.00664397	0.00352549	0.00114948	0.002878	0.00266831	0.00176593	0.00221744	0.00329969	0.00188988	0.00194899	0.00375341	0.0032913	0.0436938	0.00799166	0.0262428	0.0111874	0.00830609
k__Bacteria;p__Proteobacteria;c__Betaproteobacteria;o__Burkholderiales;f__Oxalobacteraceae;g__Polynucleobacter;	0.000221818	3.85e-05	4.55e-05	0	0	0	0	0	0.000257033	3.87e-05	0	0.00015425	0.00257483	0.000214675	0.000326548	0	8.55e-05	0	0	0	0	0	3.03e-05	2.47e-05	0	0	2.17e-05	0	8.47e-05	0.00226825	0.00150166	5.3e-05	0.000115821	0.00181729	0.0366859	0.00448265
k__Bacteria;p__Proteobacteria;c__Alphaproteobacteria;o__Sphingomonadales;f__Sphingomonadaceae;g__Sphingobium;	0.00119782	0.00223283	0.000136413	0.000785032	0.000254699	0.000252169	7.81e-05	0.000293077	0.00071398	0.000463894	0.00478443	0.000991604	0.00120695	0.00227556	0.00253982	0.0353324	0.00423348	9.71e-05	0.000173805	0.00138829	0.000154967	0.000157771	0.000302948	0.000197653	0.000252276	0.000358375	0.000151959	0.000277183	0.000338954	0.000351038	0.000884537	0.000212106	0.000277971	0.000246412	0.000435872	0.000817424
k__Bacteria;p__Firmicutes;c__Bacilli;o__Lactobacillales;f__Lactobacillaceae;g__Pediococcus;	0.0128211	0.00958577	0.00245544	0.000457935	0.00402425	0.008372	0.00312219	0.00153302	0.00282736	0.00262873	0.00228348	0.017298	0.00345993	0.0273926	0.0215522	0.0097629	0.035279	0.00024266	0.000446927	0.00353684	0.000503642	0.000247926	0.000605895	0.000988264	0.00121551	0.00114232	0.000347335	0.000428373	0.000571985	0.000540059	0.000308559	0.000212106	0.000393792	0.000338816	0.000908067	0.000369159
k__Bacteria;p__Firmicutes;c__Bacilli;o__Lactobacillales;f__Streptococcaceae;g__Lactococcus;	0.00110909	0.0013859	0.00259185	0.000196258	0.000203759	0.000756506	0.000312219	0.00015781	0.00122805	0.00216484	0.000761159	0.000903462	0.0110235	0.0329741	0.0243097	0.0004649	0.00017105	2.43e-05	0.000124146	0.000462764	0	6.76e-05	3.03e-05	4.94e-05	0.00043575	4.48e-05	0.000108542	0.000125992	6.36e-05	0.000162018	8.23e-05	2.65e-05	2.32e-05	9.24e-05	0.000145291	0.000105474
k__Bacteria;p__Proteobacteria;c__Gammaproteobacteria;o__Enterobacteriales;f__Enterobacteriaceae;g__Escherichia;	0.00727563	0.012858	0.0101855	0.0314013	0.0123274	0.0256708	0.00577606	0.00982934	0.0143367	0.00641719	0.00918828	0.00553095	0.0205986	0.00433644	0.00685752	0.00130172	0.000812487	0.00504732	0.00404718	0.00565233	0.0083682	0.00757303	0.00684662	0.00684373	0.0244708	0.0126551	0.00594812	0.00372937	0.00425811	0.00702076	0.00610948	0.00530265	0.00736623	0.00723834	0.0128946	0.0122086
k__Bacteria;p__Firmicutes;c__Clostridia;o__Clostridiales;f__Veillonellaceae;g__Megasphaera;	0.000266182	0.00065445	0.00459258	6.54e-05	0.000254699	0	0.000234165	2.25e-05	0.000257033	0.000115973	0.000326211	0.00196117	0	0.000128805	0.000326548	0.0032543	0.0310455	7.28e-05	9.93e-05	0.000297491	0.000193708	6.76e-05	6.06e-05	0.000123533	0.000160539	0.000447968	0.000130251	0.000352778	0.000127108	0.000243026	0.000123424	0.000318159	0.000185314	0.000184809	0.000145291	0.000263685
k__Bacteria;p__Firmicutes;c__Clostridia;o__Clostridiales;f__Clostridiaceae;g__Clostridium;	0.00141964	0.00153988	0.00491088	0.000523355	0.000611278	0.00161388	0.000858604	0.000225444	0.000542625	0.000889129	0.001033	0.00193914	0.000201159	0.00163153	0.00210442	0.00409112	0.0037631	0.0276875	0.0251273	0.0228407	0.029095	0.0155743	0.0249932	0.0302656	0.0236222	0.0269677	0.0302182	0.0257528	0.026269	0.027354	0.0277703	0.0262481	0.0238128	0.0281217	0.0208855	0.0277133
k__Bacteria;p__Firmicutes;c__Erysipelotrichi;o__Erysipelotrichales;f__[Coprobacillaceae];g__Catenibacterium;	4.44e-05	3.85e-05	0	0	0	0	0	0	0	0	0	0.00132214	0	0	0	0.0018596	0.0300192	0	0	0	0	0	0	2.47e-05	0	6.72e-05	0	2.52e-05	0	0	2.06e-05	0	4.63e-05	6.16e-05	0	2.64e-05
k__Bacteria;p__Proteobacteria;c__Betaproteobacteria;o__Rhodocyclales;f__Rhodocyclaceae;g__Zoogloea;	4.44e-05	7.7e-05	4.55e-05	0	0.00015282	0.000100867	0.00015611	0	0	0	0.00424074	6.61e-05	4.02e-05	0.000214675	0.000290265	0.0258484	0.00299337	2.43e-05	2.48e-05	9.92e-05	3.87e-05	2.25e-05	6.06e-05	2.47e-05	0	2.24e-05	0	0	0	0	2.06e-05	7.95e-05	0	0.0106881	0.00134394	0.00274233
k__Bacteria;p__Proteobacteria;c__Gammaproteobacteria;o__Oceanospirillales;f__Halomonadaceae;g__Halomonas;	0.00678763	0.00750693	0.0150964	0.0100092	0.023687	0.0121545	0.0153768	0.0236039	0.0149079	0.00877532	0.0174523	0.00561909	0.0119488	0.00309132	0.00326548	0.0013947	0.000812487	2.43e-05	4.97e-05	3.31e-05	7.75e-05	2.25e-05	0	4.94e-05	0.000137605	2.24e-05	0	0	0.000105923	2.7e-05	0	0	4.63e-05	3.08e-05	0.000108968	0.000105474
k__Bacteria;p__Actinobacteria;c__Actinobacteria;o__Actinomycetales;f__Nocardiaceae;g__Rhodococcus;	0.00519054	0.00723745	0.00704802	0.0222426	0.00809944	0.016744	0.00183429	0.00342674	0.0203341	0.00564404	0.00663296	0.00559706	0.0115063	0.0034348	0.00246725	0.00204556	0.00119735	9.71e-05	2.48e-05	0.000330546	0.000116225	0.000157771	6.06e-05	9.88e-05	0	0.000134391	0.000173668	0.000125992	8.47e-05	2.7e-05	0.000102853	0.000159079	6.95e-05	9.24e-05	0.000108968	0.000210948
k__Bacteria;p__Proteobacteria;c__Epsilonproteobacteria;o__Campylobacterales;f__Helicobacteraceae;g__Helicobacter;	0.00186327	0.00411919	0.000363769	0.000130839	0.000305639	0.00504337	0.000429302	0.000112722	0.000142796	0.00069584	0.000271843	0.000727177	8.05e-05	0.00197501	0.00380973	0.00065086	0.000470387	0.00424654	0.0211546	0.00525568	0.00437781	0.00527407	0.0214184	0.0123039	0.0102745	0.0159925	0.00625204	0.0115409	0.00874926	0.000324035	0.000143994	0.000371185	0.000416956	0.000277213	0.000435872	0.000949267
k__Bacteria;p__Proteobacteria;c__Betaproteobacteria;o__Burkholderiales;f__Comamonadaceae;g__Limnohabitans;	0.00181891	0.000808439	0.000136413	0.000523355	0.00163007	0.00115998	0.000507357	0.000112722	0.000485506	0.000773156	0.00244658	0.00105771	0.000603476	0.0024473	0.00148761	0.0112506	0.00162497	9.71e-05	4.97e-05	0.000694146	0.000154967	6.76e-05	0.000121179	0.00014824	0.000206408	0.000358375	0.000217085	0.000176389	0.000211846	0.0115843	0.00872195	0.000371185	0.000463285	0.00326495	0.0208492	0.00442991
k__Bacteria;p__Proteobacteria;c__Alphaproteobacteria;o__Rhizobiales;f__Phyllobacteriaceae;g__Phyllobacterium;	0.00381527	0.00384971	0.00127319	0.00804658	0.00173196	0.00110954	0.00163915	0.000563609	0.0167928	0.00382712	0.00146795	0.00218153	0	0.0015886	0.00185044	0.00037192	0.000128287	0.0010677	0.00109249	0.00102469	0.00104602	0.00105932	0.000727074	0.00121062	0.00249983	0.00194866	0.00160643	0.000907144	0.000932124	0.00121513	0.000946249	0.00111356	0.00106555	0.00113965	0.00177981	0.00121295
k__Bacteria;p__Proteobacteria;c__Betaproteobacteria;o__Burkholderiales;f__Burkholderiaceae;g__Salinispora;	0.00248436	0.00754543	0.00150055	0.00457935	0.00351485	0.00221908	0.00245873	0.00701129	0.00159931	0.00266739	0.00375143	0.00141028	0.00197136	0.000472285	0.00351947	0.00120874	0.000213812	0.00618782	0.00310366	0.00641259	0.0037192	0.00297512	0.00266594	0.00420012	0.00756829	0.00727949	0.012287	0.00239385	0.00622829	0.0072908	0.0070763	0.00707904	0.0111652	0.0163864	0.0128582	0.0127624
k__Bacteria;p__Firmicutes;c__Clostridia;o__Clostridiales;f__Veillonellaceae;g__Phascolarctobacterium;	0.000754181	0.000615953	0.000227355	0.000457935	0.00010188	0.00161388	0.000351247	0.000202899	0.000542625	0.000193289	0.000217474	0.000947533	0.000120695	0.00103044	0.00105221	0.00074384	0.00252299	0.00283912	0.00657976	0.00872641	0.0163102	0.00211864	0.00833106	0.00602841	0.0061693	0.0149173	0.0095083	0.0106085	0.00942717	0.00621068	0.0046901	0.00768884	0.0051193	0.00495903	0.00297846	0.00582744
k__Bacteria;p__Firmicutes;c__Clostridia;o__Coriobacteriales;f__Coriobacteriaceae;g__Collinsella;	0.000133091	0	9.09e-05	0	0	0	0	4.51e-05	2.86e-05	0	0.000108737	0.00169674	4.02e-05	0.000214675	0.000108849	0.00334728	0.016207	0.0150206	0.00526381	0.00594982	0.00701224	0.00353859	0.00487746	0.00615195	0.00908194	0.0131927	0.00939976	0.00569485	0.00650369	0.0073178	0.00746714	0.00779489	0.00810748	0.0110885	0.0054484	0.00959814
k__Bacteria;p__Proteobacteria;c__Gammaproteobacteria;o__Xanthomonadales;f__Xanthomonadaceae;g__Stenotrophomonas;	0.00150836	0.00192485	0.00318298	0.00117755	0.000764098	0.00176518	0.000975686	0.00130757	0.0013994	0.0161976	0.00157669	0.00149842	0.00852913	0.00631145	0.00627699	0.00204556	0.000470387	0.00101917	0.00136561	0.00261131	0.00399039	0.00205103	0.00272653	0.00195182	0.00832511	0.00521883	0.00195376	0.00103314	0.0016524	0.00226825	0.00181022	0.0018029	0.00199212	0.00243332	0.00501253	0.00461449
k__Bacteria;p__Proteobacteria;c__Gammaproteobacteria;o__Aeromonadales;f__Succinivibrionaceae;g__Succinivibrio;	4.44e-05	3.85e-05	4.55e-05	0.000327097	0	5.04e-05	7.81e-05	2.25e-05	5.71e-05	3.87e-05	0	2.2e-05	0	0	3.63e-05	0	0	0.0108226	0.00518932	0.00717284	0.00658608	0.00423729	0.00351419	0.00538604	0.00688026	0.00788424	0.0139585	0.00566965	0.0102322	0.0132584	0.0128566	0.0103402	0.00968265	0.0143227	0.0118412	0.0149246
k__Bacteria;p__Proteobacteria;c__Alphaproteobacteria;o__Rhodobacterales;f__Rhodobacteraceae;g__Rhodobacter;	0.000754181	0.000692947	0.0020462	0.000130839	0.00015282	0.00080694	0.000663466	4.51e-05	0.00151364	0.000541209	0.00369706	0.00249003	0.00277599	0.000386415	0.000326548	0.0146908	0.00324995	0	7.45e-05	0.000165273	3.87e-05	6.76e-05	0.000151474	0.00014824	4.59e-05	4.48e-05	6.51e-05	2.52e-05	6.36e-05	0.00218724	0.00187193	0.000583291	0.000787584	0.000893242	0.00472195	0.000421896
k__Bacteria;p__Bacteroidetes;c__Flavobacteriia;o__Flavobacteriales;f__Flavobacteriaceae;g__Chryseobacterium;	4.44e-05	0.000115491	4.55e-05	0	0	5.04e-05	0.000234165	2.25e-05	0	0.0145353	5.44e-05	8.81e-05	0.003299	0.00025761	0.000471681	0.00027894	4.28e-05	0	4.97e-05	3.31e-05	0	0	6.06e-05	0	0.000206408	0	6.51e-05	0	4.24e-05	2.7e-05	2.06e-05	0	4.63e-05	0.000246412	3.63e-05	0.000791056
k__Bacteria;p__Proteobacteria;c__Deltaproteobacteria;o__Desulfovibrionales;f__Desulfovibrionaceae;g__Desulfovibrio;	0.00110909	0.00165537	0.000272826	0.000392516	0.00010188	0.0142727	0.0100301	0.000112722	0.000399829	0.000734498	0.000815528	0.000815319	0.00024139	0.000472285	0.000471681	0.00055788	0.00017105	0.00167435	0.00963377	0.00320629	0.00922052	0.00293004	0.00745251	0.00662137	0.00339426	0.00766026	0.00329969	0.0047877	0.00300822	0.000567062	0.000226277	0.000715858	0.00138985	0.000893242	0.00116233	0.00108111
k__Bacteria;p__Proteobacteria;c__Epsilonproteobacteria;o__Campylobacterales;f__Campylobacteraceae;g__Arcobacter;	0.000221818	0.000461965	0.000682066	0	5.09e-05	0	0.00015611	0	2.86e-05	3.87e-05	0.000326211	0.000220357	0	4.29e-05	0.000253982	0.00055788	0	0.000679447	0.00206083	0.00155356	0.00116225	0.000788857	0.0023327	0.00158122	0.00119258	0.00123191	0.000629545	0.00133552	0.00112279	0.00102611	0.00102853	0.000821911	0.0141302	0.0021561	0.00722821	0.00522097
k__Bacteria;p__Proteobacteria;c__Betaproteobacteria;o__Burkholderiales;f__Oxalobacteraceae;g__Janthinobacterium;	0.00124218	0.00153988	0.00186431	0.00157006	0.00137538	0.00110954	0.000468329	0.000225444	0.00274168	0.00131437	0.000924265	0.00105771	0.000724171	0.00450818	0.00439026	0.00065086	0.0003421	0.000485319	0.000620732	0.0141143	0.0004649	0.000473314	0.000727074	0.000592959	0.000733894	0.00029118	0.000586128	0.000629961	0.00103805	0.00129614	0.00133709	0.00135217	0.001552	0.0021253	0.00395917	0.00999367
k__Bacteria;p__Proteobacteria;c__Betaproteobacteria;o__Burkholderiales;f__Comamonadaceae;g__Rubrivivax;	0.000931636	0.00026948	0.000272826	0.00117755	5.09e-05	0.000151301	0.000546384	4.51e-05	0.000456947	0.000541209	0.00331648	0.000484784	4.02e-05	0.000644026	0.000253982	0.0135751	0.00213812	0.000145596	0.000124146	0.00118997	7.75e-05	0.00018031	6.06e-05	0.00014824	6.88e-05	4.48e-05	0.000151959	0.000176389	0.00031777	0.00113412	0.000719972	0.000318159	0.000787584	0.00120126	0.000472195	0.00166122
k__Bacteria;p__Firmicutes;c__Clostridia;o__Clostridiales;f__Lachnospiraceae;g__Blautia;	0.00567854	0.000230982	4.55e-05	0	5.09e-05	0.00040347	0.000468329	4.51e-05	0.000314151	3.87e-05	0	0.000947533	0.000160927	0.0128805	0.00181416	0.00083682	0.00277956	0.00533851	0.00657976	0.00413182	0.00670231	0.00320051	0.00711927	0.00827671	0.00747655	0.00869059	0.00731575	0.00700517	0.00493602	0.00496854	0.00436097	0.002996	0.00370628	0.00480503	0.00312375	0.00445628
k__Bacteria;p__Proteobacteria;c__Betaproteobacteria;o__Rhodocyclales;f__Rhodocyclaceae;g__Dechloromonas;	0.00190763	0.00142439	0.00727537	0.000327097	0.000815037	0.00151301	0.00238067	0.000270532	0.000913894	0.00131437	0.00320774	0.00158657	0.0058336	0.000686961	0.000435398	0.0123663	0.00196707	4.85e-05	7.45e-05	0.000826364	3.87e-05	4.51e-05	0	4.94e-05	6.88e-05	8.96e-05	6.51e-05	7.56e-05	8.47e-05	0.000297032	0.000226277	0.000450725	0.00159833	0.0063451	0.00094439	0.00147664
k__Bacteria;p__Firmicutes;c__Erysipelotrichi;o__Erysipelotrichales;f__Erysipelotrichaceae;g__Allobaculum;	0.000133091	0	0	0	0	0.000151301	0	0	0	3.87e-05	0	0	0	0.000558156	3.63e-05	0	0	0.00133463	0.0122905	0.001818	0.00189834	0.000338082	0.00557424	0.00190241	0.00151366	0.00718989	0.00240964	0.00372937	0.00197017	0.000864094	0.00098739	0.000636318	0.000671763	0.00117045	0.00101703	0.000949267
k__Bacteria;p__Proteobacteria;c__Gammaproteobacteria;o__Oceanospirillales;f__Halomonadaceae;g__Candidatus Portiera;	0.0116676	0.006583	0.00181884	0.000850451	0.00173196	0.00297559	0.0120985	0.00166828	0.00208482	0.00560538	0.00217474	0.0122298	0.000281622	0.00910223	0.00224956	0.0004649	0.00474663	0	0	0	3.87e-05	0	0	4.94e-05	9.17e-05	4.48e-05	6.51e-05	2.52e-05	4.24e-05	2.7e-05	8.23e-05	0	6.95e-05	0.000123206	7.26e-05	5.27e-05
k__Bacteria;p__Firmicutes;c__Bacilli;o__Turicibacterales;f__Turicibacteraceae;g__Turicibacter;	0.000443636	0.000692947	0.000682066	0.000915871	0.00015282	0.00292516	0.000312219	6.76e-05	0.000114237	0.000154631	5.44e-05	0.000484784	0.000482781	0.00107338	0.0010885	0	0.0003421	0.00133463	0.00816884	0.00294186	0.0119712	0.00160025	0.00478657	0.00462014	0.00128432	0.0014559	0.00138934	0.00143631	0.00131345	0.000297032	0.000370271	0.000291646	0.000347464	0.000338816	0.000326904	0.000448265
k__Bacteria;p__Proteobacteria;c__Alphaproteobacteria;o__Sphingomonadales;f__Sphingomonadaceae;g__Sphingomonas;	0.005856	0.00438867	0.00391051	0.0017009	0.00295451	0.0038834	0.00472232	0.00153302	0.00516921	0.00336323	0.00309901	0.0047597	0.00285645	0.0114207	0.00867167	0.00288238	0.00111182	0.00181995	0.000844196	0.00426404	0.0018596	0.000721241	0.00157533	0.00130945	0.00266037	0.0014335	0.0028221	0.00173869	0.00148293	0.00248427	0.00181022	0.0011931	0.00208478	0.00160168	0.00196143	0.00379707
k__Bacteria;p__Firmicutes;c__Clostridia;o__Clostridiales;f__Lachnospiraceae;g__Coprococcus;	0.000665454	0.00026948	0	0	0	0	0.000312219	0.000225444	2.86e-05	0.000231947	0	0.000132214	0	0.000987506	0.00058053	0	0.000128287	0.000533851	0.00131595	0.000826364	0.00174337	0.000879012	0.00539247	0.00269302	0.00123845	0.0106169	0.00136763	0.00463651	0.00154648	0.000486053	0.000761113	0.000371185	0.000810748	0.000554426	0.000508518	0.000606476
k__Bacteria;p__Proteobacteria;c__Betaproteobacteria;o__Burkholderiales;f__Comamonadaceae;g__Ramlibacter;	0.000931636	0.000423468	0.00231903	0.000915871	0.00163007	0.000554771	0.00148304	0.00015781	0.0020277	0.000657183	0.000489317	0.000947533	0.00140811	0.00163153	0.00105221	0.00306834	0.00017105	0.000363989	0.000297952	0.0105775	0.000426158	0.000338082	0.00063619	0.000469426	0.000298145	0.000246383	0.000390752	0.000302381	0.000614355	0.00310534	0.00201592	0.00098099	0.00215427	0.0022177	0.00802732	0.00171395
k__Bacteria;p__Proteobacteria;c__Gammaproteobacteria;o__Alteromonadales;f__Alteromonadaceae;g__Marinobacter;	0.00186327	0.0104712	0.00131866	0.000130839	0.000815037	0.000605205	0.000702494	0.000608698	0.000656861	0.00181692	0.000761159	0.00121196	0.0016495	0.00051522	0.00580531	9.3e-05	0.000256575	0.00012133	0.000198634	0.00115691	0.000309933	0.000225388	0.000181769	0.000370599	0.00027521	0.000380773	0.000455878	0.000302381	0.000211846	0.000189021	0.000164565	0.000159079	0.000393792	0.000123206	0.00123497	0.000395528
k__Bacteria;p__Proteobacteria;c__Gammaproteobacteria;o__Vibrionales;f__Vibrionaceae;g__Vibrio;	0.00377091	0.0102402	0.00109131	0.00104671	0.00142632	0.00166431	0.00152207	0.000495976	0.00182779	0.0024741	0.000652422	0.00257817	0.000201159	0.00193208	0.00493451	0.00018596	0.0003421	0.000194128	0.000273122	0.000165273	7.75e-05	0.00018031	9.09e-05	0.000296479	0.000298145	0.000268781	0.000455878	0.000176389	0.000233031	0.000270029	0.000287989	0.000265132	0.000231642	0.000246412	0.000472195	0.000632845
k__Bacteria;p__Proteobacteria;c__Gammaproteobacteria;o__Alteromonadales;f__Alteromonadaceae;g__Alteromonas;	0.00949381	0.006583	0.00100036	0.00124297	0.00224135	0.00221908	0.0035515	0.0010145	0.00508354	0.00518014	0.00173979	0.0101584	0.000603476	0.00437937	0.00188672	0	0.00222365	2.43e-05	4.97e-05	6.61e-05	0	0	0	9.88e-05	6.88e-05	4.48e-05	0	0	0	0	0	2.65e-05	2.32e-05	0.000154007	3.63e-05	0
k__Bacteria;p__Proteobacteria;c__Gammaproteobacteria;o__Oceanospirillales;f__Oceanospirillaceae;g__Marinomonas;	0.0101149	0.00581306	0.00127319	0.000327097	0.00106974	0.00161388	0.00238067	0.00133012	0.00105669	0.00483222	0.00173979	0.0076023	0.00249437	0.00425057	0.00304778	9.3e-05	0.00179602	0	0	0	0	0	0	0	0	0	2.17e-05	0	0	0	2.06e-05	0	0	3.08e-05	0	0
k__Bacteria;p__Firmicutes;c__Clostridia;o__Clostridiales;f__Veillonellaceae;g__Megamonas;	8.87e-05	0.000192485	0.000272826	0	0.000407519	0.00080694	0.00109277	0.00103704	0.000514065	0.000115973	0	0.000132214	0	4.29e-05	3.63e-05	0	0.000128287	0.00395535	0.00382371	0.00419793	0.00573377	0.0025018	0.00442304	0.00622607	0.00671972	0.00633875	0.00998589	0.00566965	0.00637658	0.00807388	0.00670603	0.0068139	0.00630067	0.00683792	0.00341433	0.00999367
k__Bacteria;p__Firmicutes;c__Bacilli;o__Exiguobacterales;f__Exiguobacteraceae;g__Exiguobacterium;	0.000532363	0.000230982	0.00104584	0.000196258	0.00142632	0.000453904	0.000702494	0.000721419	0.00151364	0.00908458	0.000706791	0.000418677	0.00474735	0.0015886	0.00177787	0.00120874	0.000299337	7.28e-05	0.000223464	0.000330546	0.0004649	0.000112694	0.000333242	0.000469426	0.000688026	0.0013887	0.000238793	0.000151191	0.0002754	0.000216024	0.000164565	0.000212106	0.000301135	0.00021561	0.000326904	0.00181943
k__Bacteria;p__Proteobacteria;c__Gammaproteobacteria;o__Alteromonadales;f__Alteromonadaceae;g__Glaciecola;	0.00186327	0.00854635	0.000500182	0.000130839	0.000815037	0.000353036	0.00117082	0.000338165	0.00185635	0.00112108	0.000434948	0.00158657	0	0.00034348	0.00246725	0	0.000128287	0	0	0	0	2.25e-05	6.06e-05	0	4.59e-05	0	2.17e-05	2.52e-05	2.12e-05	2.7e-05	0	0	0	0	3.63e-05	0
k__Bacteria;p__Firmicutes;c__Clostridia;o__Clostridiales;f__Ruminococcaceae;g__Faecalibacterium;	0.000443636	0.000461965	0.000272826	0.000457935	0.000509398	0.00131128	0.00249776	0.00036071	0.00034271	0.00034792	0.000108737	0.00035257	0	0.00017174	0.000507964	0.00018596	0.00017105	0.00582383	0.00600869	0.00390044	0.00503642	0.00365128	0.00496834	0.00570723	0.00839392	0.00725709	0.00777163	0.00496409	0.00709686	0.00680474	0.00586263	0.00490495	0.00546676	0.00539025	0.00366859	0.0075414
k__Bacteria;p__Proteobacteria;c__Alphaproteobacteria;o__Sphingomonadales;f__Sphingomonadaceae;g__Kaistobacter;	0.000754181	0.00092393	0.000227355	0.000327097	0.0012735	0.000706072	0.000468329	0.000428343	0.000799657	0.000425236	0.000326211	0.000594963	0.000563244	0.000901636	0.00058053	0.00176662	0.000470387	0.000873574	0.001018	0.00826364	0.00143344	0.000563469	0.00121179	0.00118592	0.00305025	0.00103033	0.0015413	0.00120952	0.00144056	0.00102611	0.000946249	0.00090145	0.00115821	0.00107805	0.00236097	0.00110748
k__Bacteria;p__Bacteroidetes;c__Flavobacteriia;o__Flavobacteriales;f__Flavobacteriaceae;g__Flavobacterium;	0.000221818	0.000461965	0	0.000130839	0	0.000353036	7.81e-05	0.000293077	0.000371269	0.000386578	0.001033	0.000110178	0.000442549	0.00017174	7.26e-05	0.00502092	0.00106906	4.85e-05	7.45e-05	0.000396655	3.87e-05	4.51e-05	6.06e-05	0	0.000252276	0.000156789	8.68e-05	0	0.000169477	0.000837091	0.000555407	0.000106053	4.63e-05	0.000893242	0.0081726	0.000448265
k__Bacteria;p__Firmicutes;c__Bacilli;o__Bacillales;f__Bacillaceae;g__Bacillus;	0.00199636	0.000885433	0.00181884	0.00804658	0.000509398	0.00186605	0.000663466	4.51e-05	0.00208482	0.000657183	0.000217474	0.000749212	0.000201159	0.00103044	0.000544247	9.3e-05	0.0003421	0.000412521	0.000521415	0.00158662	0.00104602	0.000766318	0.000575601	0.00101297	0.00165126	0.0014335	0.000716379	0.000503969	0.00091094	0.000378041	0.000431983	0.000636318	0.00120454	0.000400419	0.00094439	0.000632845
k__Bacteria;p__Proteobacteria;c__Gammaproteobacteria;o__Vibrionales;f__Vibrionaceae;g__Aliivibrio;	0.000798545	0.00796889	0.00040924	0.000130839	0.000305639	0.000353036	0.000351247	0.000180355	0.000371269	0.000927787	0.000489317	0.000572927	4.02e-05	0.00017174	0.00428141	0	0	2.43e-05	4.97e-05	3.31e-05	0	0	0	0.00014824	0.000389881	8.96e-05	0	5.04e-05	0	0.000108012	2.06e-05	0	9.27e-05	3.08e-05	7.26e-05	7.91e-05
k__Bacteria;p__Proteobacteria;c__Gammaproteobacteria;o__Aeromonadales;f__Aeromonadaceae;g__Tolumonas;	0.000798545	0.00180936	0.00527464	0.00261677	0.00320921	0.00771636	0.000351247	0.00087923	0.00162787	0.00150765	0.000543685	0.000550891	0.00301738	0.000128805	0.000435398	9.3e-05	0	2.43e-05	0	0	3.87e-05	0	0	2.47e-05	0	0	0	5.04e-05	2.12e-05	0	4.11e-05	0	2.32e-05	0.000616029	0.00119865	0.00348065
k__Bacteria;p__Proteobacteria;c__Gammaproteobacteria;o__Oceanospirillales;f__Alcanivoracaceae;g__Alcanivorax;	0.00168582	0.00746843	0.00040924	0.000196258	0.00010188	0.00136171	0.000546384	0.00229952	0.000656861	0.0017396	0.00114174	0.000969569	0.000321854	0.000472285	0.00341062	9.3e-05	0.000213812	9.71e-05	0.000124146	0.000892473	0.000387417	6.76e-05	6.06e-05	7.41e-05	4.59e-05	0.000134391	0.000260501	0.000176389	0.000127108	0	0.000205706	0.000106053	0.00016215	0.000123206	0.000435872	0.000105474
k__Bacteria;p__Actinobacteria;c__Actinobacteria;o__Actinomycetales;f__Micrococcaceae;g__Micrococcus;	0.000931636	0.00103942	0.00113678	0.00719613	0.000203759	0.000201735	0.000273192	0.000293077	0.000514065	0.000966445	0.000869896	0.00066107	0.000844866	0.000772831	0.000943362	0.0004649	0.000299337	0.000145596	9.93e-05	0.000165273	0.000154967	9.02e-05	9.09e-05	0.000172946	0.000114671	0.000156789	0.000347335	0.000151191	8.47e-05	0.000216024	8.23e-05	0.000106053	0.000115821	6.16e-05	0.000217936	0.000237317
k__Bacteria;p__Firmicutes;c__Clostridia;o__Clostridiales;f__Lachnospiraceae;g__[Ruminococcus];	0.000399272	0.000731444	0.000136413	0	0.00015282	0.00181561	0.000234165	0.000180355	0.000514065	0.000231947	5.44e-05	0.00050682	4.02e-05	0.00124512	0.00137876	0.00037192	0.000812487	0.00424654	0.00506518	0.00383433	0.00499768	0.00207357	0.00481687	0.00716492	0.00655918	0.00580119	0.00603495	0.00622401	0.00478773	0.0036454	0.00347644	0.00315508	0.00347463	0.00329576	0.00308743	0.00429807
k__Bacteria;p__Cyanobacteria;c__Synechococcophycideae;o__Pseudanabaenales;f__Pseudanabaenaceae;g__Pseudanabaena;	0	0	0	0	0	0	0	0	0	0	0	0	0	0	0	0	0	0	0	0	0	0	3.03e-05	0	0	0	0	0	2.12e-05	0.00696676	0.00333244	0	2.32e-05	0	0	0
k__Bacteria;p__Verrucomicrobia;c__Verrucomicrobiae;o__Verrucomicrobiales;f__Verrucomicrobiaceae;g__Akkermansia;	0.000266182	0.000423468	0.000136413	0.000261677	0.000203759	0.000201735	3.9e-05	0.000338165	0.000199914	0	0	0.000220357	0	0.000300545	0.000616814	0.0004649	0.00684199	0.000533851	0.000273122	0.000661091	0.000542383	9.02e-05	0.00151474	0.00214948	0.000389881	0.00152309	0.000607837	0.000655159	0.000338954	0.000135015	0	7.95e-05	9.27e-05	0.000123206	0	5.27e-05
k__Bacteria;p__Proteobacteria;c__Betaproteobacteria;o__Burkholderiales;f__Alcaligenaceae;g__Achromobacter;	0.000133091	0.000615953	0.00227355	0	0	0.000605205	0.000117082	0.000473431	0.00128516	0.000463894	0	0.000440713	0.00132765	0.000472285	0.00068938	0.00018596	0.000213812	0.00109197	0.00109249	0.00224771	0.00259569	0.00245673	0.0029083	0.00227301	0.00653625	0.00499485	0.0020623	0.00103314	0.00129226	0.00216024	0.0013988	0.00114007	0.0016215	0.00231011	0.00548473	0.00490455
k__Bacteria;p__Bacteroidetes;c__Bacteroidia;o__Bacteroidales;f__Porphyromonadaceae;g__Parabacteroides;	8.87e-05	0.000346474	0.000863951	0	0.00010188	0	0.000741521	0	0	0.000115973	0	6.61e-05	0	8.59e-05	0.000253982	0.0004649	0	0.00293618	0.0063563	0.00271047	0.00383542	0.00196087	0.00527129	0.00491662	0.00392175	0.00526363	0.0043634	0.003175	0.0035802	0.00199822	0.00220106	0.00169685	0.00236275	0.00286454	0.00203407	0.00324333
k__Bacteria;p__Proteobacteria;c__Betaproteobacteria;o__Burkholderiales;f__Comamonadaceae;g__Hydrogenophaga;	0.000177454	0.000153988	0.00159149	0.000196258	0.000967857	0.000100867	3.9e-05	6.76e-05	0.000199914	3.87e-05	0.000869896	0.000176285	0.0024139	0.000214675	7.26e-05	0.0060437	0.000470387	2.43e-05	2.48e-05	0.000330546	0	2.25e-05	0	0	0.000183474	0	0	0	0	0.000135015	0.000102853	0	2.32e-05	0.000246412	0.001126	0.00287417
k__Bacteria;p__Fusobacteria;c__Fusobacteria;o__Fusobacteriales;f__Fusobacteriaceae;g__u114;	0	0	4.55e-05	0	0.00010188	5.04e-05	0	0	0	3.87e-05	0	0	0	0	0	0	0	0	0	0	0	0	0	0	0	0	0	0	0	0.000891097	0.000164565	0.00599199	0.000718091	9.24e-05	0.000217936	7.91e-05
k__Bacteria;p__Proteobacteria;c__Gammaproteobacteria;o__HTCC2188;f__HTCC2188;g__HTCC;	0.00519054	0.0026948	0.00150055	0.000261677	0.000662218	0.000958241	0.002849	0.000721419	0.000628302	0.00309262	0.00146795	0.00586148	0	0.00279078	0.000943362	0.0004649	0.00162497	2.43e-05	4.97e-05	3.31e-05	0	0.000135233	9.09e-05	0	6.88e-05	2.24e-05	6.51e-05	2.52e-05	0	0.000675074	0.000349701	2.65e-05	4.63e-05	9.24e-05	3.63e-05	2.64e-05
k__Bacteria;p__Firmicutes;c__Bacilli;o__Bacillales;f__Staphylococcaceae;g__Staphylococcus;	0.00306109	0.00307977	0.00109131	0.000327097	0.00117162	0.00151301	0.00167818	0.00123994	0.00177067	0.00189423	0.000924265	0.00229171	0.00092533	0.00583917	0.00576902	0.00102278	0.000299337	0.000606649	0.00104283	0.00105775	0.00108477	0.000946628	0.000817959	0.0011365	0.00192647	0.00109752	0.00130251	0.000881945	0.000995678	0.00170119	0.00102853	0.00108704	0.00111188	0.000677632	0.00101703	0.00071195
k__Bacteria;p__Actinobacteria;c__Actinobacteria;o__Actinomycetales;f__Corynebacteriaceae;g__Corynebacterium;	0.00110909	0.00581306	0.000863951	0.00261677	0.00331109	0.00196692	0.00214651	0.00137521	0.00548336	0.00150765	0.00266406	0.00200524	0.00386225	0.00279078	0.0036646	0.0009298	0.000898012	0.000339723	0.000471757	0.000694146	0.00178212	0.000428237	0.000424127	0.000889438	0.00027521	0.000694351	0.00167155	0.000579564	0.000508431	0.000702077	0.000473124	0.000397699	0.000509613	0.000400419	0.000508518	0.000659213
k__Bacteria;p__Proteobacteria;c__Betaproteobacteria;o__Rhodocyclales;f__Rhodocyclaceae;g__Sulfuritalea;	0.000399272	0.000192485	4.55e-05	0	5.09e-05	0.000100867	7.81e-05	4.51e-05	5.71e-05	0.00181692	0.000489317	0.000132214	0.000683939	0.0041647	0.00540619	0.00158066	0.000769724	2.43e-05	4.97e-05	0.00118997	3.87e-05	2.25e-05	3.03e-05	0.000123533	2.29e-05	0	0	7.56e-05	0	5.4e-05	0	0	9.27e-05	0.000246412	0.000326904	0.00239954
k__Bacteria;p__Proteobacteria;c__Alphaproteobacteria;o__Rhodobacterales;f__Rhodobacteraceae;g__Marivita;	0.000310545	0.000307977	4.55e-05	0.00536439	0	0	7.81e-05	9.02e-05	2.86e-05	3.87e-05	5.44e-05	0.000198321	0	0.00017174	0	0	0	0.00012133	9.93e-05	0.000165273	0.000271192	0.000450775	0.000151474	0.000172946	0.000160539	0.000179187	8.68e-05	0.000100794	4.24e-05	2.7e-05	0.000143994	0.000132566	0.00016215	0	0.000181613	0.000263685
k__Bacteria;p__Proteobacteria;c__Betaproteobacteria;o__Burkholderiales;f__Oxalobacteraceae;g__Ralstonia;	0.00128655	0.00150139	0.00300109	0.00143922	0.00015282	0.00100868	0.000234165	0.000112722	0.000942453	0.000927787	0.000652422	0.00145435	0.00148857	0.00124512	0.00174159	0.00065086	0.000513149	0.0012133	0.000869025	0.00522262	0.00123973	0.00135233	0.000848254	0.00118592	0.00272917	0.00163509	0.00249647	0.000957541	0.00127108	0.00321335	0.00230391	0.0015908	0.00138985	0.00224851	0.0051215	0.00442991
k__Bacteria;p__Proteobacteria;c__Gammaproteobacteria;o__Xanthomonadales;f__Xanthomonadaceae;g__Lysobacter;	0.000133091	0.000538959	4.55e-05	0.000785032	5.09e-05	5.04e-05	0.00015611	0.000338165	5.71e-05	0.000270605	5.44e-05	6.61e-05	0.000563244	0.000386415	0.000943362	0.00055788	0.00017105	0.000169862	0.000471757	0.00515651	0.000309933	0.000270465	0.000363537	0.000222359	0.00116964	0.000268781	0.000303918	0.000251984	0.00116515	0.000243026	0.000452554	0.00103402	0.000579106	0.000646831	0.00141658	0.000738319
k__Bacteria;p__Proteobacteria;c__Alphaproteobacteria;o__Rhizobiales;f__Hyphomicrobiaceae;g__Rhodoplanes;	0.00106473	0.000577456	0.000636595	0.000523355	5.09e-05	0.000151301	0.000468329	6.76e-05	0.00108525	0.000231947	0.000869896	0.00330535	8.05e-05	0.000815766	0.000725663	0.00102278	0.00153945	0.000436787	0.00034761	0.00393349	0.000581125	0.000247926	0.000484716	0.000420012	0.00506846	0.000313578	0.000260501	0.000352778	0.000677909	0.000486053	0.000452554	0.000530265	0.000532777	0.000554426	0.00094439	0.000501002
k__Bacteria;p__Proteobacteria;c__Betaproteobacteria;o__Neisseriales;f__Neisseriaceae;g__Vogesella;	0	3.85e-05	0	0	0	0	0	0	2.86e-05	0	0.00108737	2.2e-05	0	0	3.63e-05	0.00502092	0.000726962	0	0	0	0	0	0	0	0	0	0	0	2.12e-05	0	0	0	0	0	3.63e-05	0
k__Bacteria;p__Proteobacteria;c__Alphaproteobacteria;o__Rhodospirillales;f__Acetobacteraceae;g__Swaminathania;	0.00434763	0.000500462	0.000500182	6.54e-05	0.000203759	0.000605205	0.00234165	0.00015781	0.000285592	0.000386578	0.000326211	0.00193914	0.000683939	0.00347774	0.00192301	0.00083682	0.00496044	0	0	0	0	0	0	0	0	0	2.17e-05	0	0	0	0	2.65e-05	2.32e-05	0	3.63e-05	0
k__Bacteria;p__Proteobacteria;c__Betaproteobacteria;o__Hydrogenophilales;f__Hydrogenophilaceae;g__Thiobacillus;	8.87e-05	0.000423468	0.000136413	0	0.00010188	0.00494251	0.000117082	6.76e-05	5.71e-05	0	0.000163106	0.00015425	0	8.59e-05	0.000145133	0.00018596	0	2.43e-05	0	0.000594982	0.000154967	0.000112694	0	4.94e-05	6.88e-05	2.24e-05	2.17e-05	0	6.36e-05	0.000189021	0.000205706	0.00111356	0.0022701	6.16e-05	0.000145291	0.000131843
k__Bacteria;p__Proteobacteria;c__Alphaproteobacteria;o__Rhodobacterales;f__Rhodobacteraceae;g__Paracoccus;	0.00062109	0.000885433	0.000591124	0.00111213	0.000560338	0.00115998	0.000585412	0.00112722	0.00117093	0.000270605	0.00239221	0.000639034	4.02e-05	0.00154566	0.00123363	0.00492794	0.00119735	0.000412521	0.000273122	0.000991637	0.00023245	0.000315543	0.000454422	0.000667078	0.000802697	0.000649554	0.000759796	0.000403175	0.000487247	0.000432047	0.0010491	0.000503752	0.000903405	0.00154007	0.00185246	0.0037707
k__Bacteria;p__Verrucomicrobia;c__[Spartobacteria];o__[Chthoniobacterales];f__[Chthoniobacteraceae];g__DA101;	0.000532363	0.000307977	0.000636595	0.00104671	0.00132444	0.000302602	0.000195137	0.00439615	0.000514065	0.00034792	0.000108737	0.000594963	0.00124718	0.000128805	0.000362832	0.00018596	4.28e-05	0.000218394	9.93e-05	0.000198327	0.000581125	0.000112694	0.000272653	0.000271773	0.00479325	0.00042557	0.000390752	0.000226786	0.000444878	0.00045905	0.000102853	0.000689344	0.000347464	0.000338816	0.000290582	0.000580108
k__Bacteria;p__Proteobacteria;c__Alphaproteobacteria;o__Caulobacterales;f__Caulobacteraceae;g__Caulobacter;	8.87e-05	0.000192485	4.55e-05	0.000261677	0	0.000100867	0	2.25e-05	0.000199914	0.000154631	0.00119611	0.00015425	0.000201159	0.000214675	0.000399115	0.00474198	0.00158221	2.43e-05	4.97e-05	0.000396655	0	6.76e-05	9.09e-05	9.88e-05	9.17e-05	2.24e-05	8.68e-05	0.000100794	8.47e-05	0.000135015	0.000102853	2.65e-05	2.32e-05	0	7.26e-05	0.00018458
k__Bacteria;p__Proteobacteria;c__Betaproteobacteria;o__Burkholderiales;f__Oxalobacteraceae;g__Cupriavidus;	0.000310545	0.000731444	0.00109131	0.00464477	0.00112068	0.00146258	0.000117082	0.000180355	0.00111381	0.000231947	0.000271843	0.000639034	0.00092533	0.000300545	0.000253982	0	4.28e-05	0.000145596	2.48e-05	0.000958583	7.75e-05	9.02e-05	9.09e-05	7.41e-05	0.000344013	4.48e-05	6.51e-05	0	2.12e-05	5.4e-05	0.000123424	2.65e-05	0.000115821	0.000154007	0.000363227	0.000263685
k__Bacteria;p__Actinobacteria;c__Actinobacteria;o__Actinomycetales;f__Pseudonocardiaceae;g__Saccharopolyspora;	0.000887272	0.000769941	0.000363769	0.00176632	0.00015282	0.000907807	0.000234165	0.00189373	0.00462659	0.000386578	0.0019029	0.000484784	0.00104602	0.00051522	0.000253982	9.3e-05	0	0	0	0.000132218	0	0	3.03e-05	0	4.59e-05	2.24e-05	2.17e-05	5.04e-05	0	0	2.06e-05	0	0	0	0	0.000342791
k__Bacteria;p__Proteobacteria;c__Alphaproteobacteria;o__Rhodobacterales;f__Rhodobacteraceae;g__Thalassobius;	0.00133091	0.00458115	0.000227355	0.000785032	0.00112068	0.00115998	0.00117082	0.000180355	0.00102813	0.00108242	0.000489317	0.00165267	8.05e-05	0.000858701	0.00330177	0	0.000427625	0	2.48e-05	9.92e-05	7.75e-05	0.000112694	0.000151474	0.000197653	0.000344013	0.000246383	8.68e-05	7.56e-05	8.47e-05	8.1e-05	4.11e-05	5.3e-05	6.95e-05	6.16e-05	3.63e-05	0.000158211
k__Bacteria;p__Bacteroidetes;c__Bacteroidia;o__Bacteroidales;f__[Paraprevotellaceae];g__Paraprevotella;	0	0	0	0	0	0	0	0	0	0	0	0	0	0	0	0	0	0.000509585	0.00454376	0.00244604	0.00127848	0.000202849	0.000757369	0.0011118	0.000344013	0.000873539	0.000347335	0.00176389	0.00103805	5.4e-05	6.17e-05	0.000106053	9.27e-05	3.08e-05	0	5.27e-05
k__Bacteria;p__Firmicutes;c__Bacilli;o__Lactobacillales;f__Streptococcaceae;g__Streptococcus;	0.000975999	0.000846936	0	0.00287845	0.000916917	0.000302602	0.00015611	0.000112722	8.57e-05	0.000579867	0.000163106	0.000771248	0.000523013	0.00407883	0.00297522	0.0004649	0.000256575	0.000461053	0.000571074	0.000727201	0.00104602	0.000586008	0.000757369	0.000568252	0.00155953	0.000604757	0.000955172	0.000831548	0.000677909	0.000702077	0.000411413	0.000556778	0.000694927	0.000677632	0.000581163	0.00071195
k__Bacteria;p__Actinobacteria;c__Actinobacteria;o__Actinomycetales;f__Propionibacteriaceae;g__Propionibacterium;	0.000842908	0.0026948	0.00127319	0.000523355	0.00366767	0.00141214	0.000858604	0.00164574	0.00128516	0.000966445	0.00222911	0.00066107	0.00406341	0.00167447	0.00312035	0.00074384	0.000128287	0	0	0	0	0	0	0	0	0	0	0	0	0	0	0	0	0	0	0
k__Bacteria;p__Acidobacteria;c__Solibacteres;o__Solibacterales;f__Solibacteraceae;g__Candidatus Solibacter;	0.000310545	0.000538959	0.000727537	0.00104671	0.000916917	0.000554771	0.000585412	6.76e-05	0.000485506	0.000231947	0.00038058	0.00169674	0.000362086	0.00051522	0.000471681	0.00027894	0.000812487	7.28e-05	0.000422098	0.00231382	0.000193708	0.000157771	0.000363537	0.000420012	0.00405935	0.000156789	0.00028221	0.000151191	0.000741463	8.1e-05	0.000123424	0.000503752	0.000694927	0.000246412	0.000363227	0.000474633
k__Bacteria;p__Proteobacteria;c__Betaproteobacteria;o__Burkholderiales;f__Comamonadaceae;g__Hylemonella;	0.000798545	0.000731444	0.00118225	0.000785032	0.00168101	0.00040347	0.000507357	0.000563609	0.00108525	0.000386578	0.002066	0.000440713	4.02e-05	0.00034348	0.000145133	0.00399814	0.0003421	2.43e-05	4.97e-05	0.00132218	0	4.51e-05	6.06e-05	0.00014824	2.29e-05	2.24e-05	0	5.04e-05	8.47e-05	0.000189021	0.000205706	0.000424212	0.000463285	0.000462022	0.000254259	0.000606476
k__Bacteria;p__Proteobacteria;c__Deltaproteobacteria;o__Syntrophobacterales;f__Desulfobacteraceae;g__Desulfococcus;	4.44e-05	0.000192485	0.000591124	0	0	0.000100867	0.000936658	0	0.000628302	0.000154631	0.000217474	0.00015425	0	4.29e-05	3.63e-05	0	4.28e-05	2.43e-05	7.45e-05	6.61e-05	0.000116225	0.000112694	6.06e-05	9.88e-05	6.88e-05	0.000134391	0	7.56e-05	2.12e-05	0.000405044	0.000123424	0.00283692	0.00398425	3.08e-05	3.63e-05	0.000158211
k__Bacteria;p__Firmicutes;c__Bacilli;o__Bacillales;f__Bacillaceae;g__Geobacillus;	0.000266182	0.000423468	0	0.00385974	0.00010188	0.000302602	0	2.25e-05	0.000285592	0.000115973	5.44e-05	0.000132214	0	0.00017174	0.000145133	0.00018596	0.000213812	9.71e-05	0.000173805	0.000264437	0.000503642	6.76e-05	0.000151474	0.000197653	0.000412816	0.000134391	0.000195376	0.000151191	0.000296585	0.000432047	0.000411413	0.000185593	0.000115821	0.000154007	0.000290582	0.000316422
k__Bacteria;p__Firmicutes;c__Clostridia;o__Clostridiales;f__Veillonellaceae;g__Veillonella;	0.000221818	0.000384971	0.000863951	0.00379432	0.00015282	5.04e-05	0.000273192	0.000563609	0.000142796	0.000193289	5.44e-05	0.000132214	4.02e-05	0.000300545	0.000108849	9.3e-05	4.28e-05	0.000436787	0.000397269	0.000727201	0.00069735	0.000202849	0.000212063	0.000617665	0.000802697	0.00105273	0.000824921	0.000554366	0.000571985	0.000756082	0.000514266	0.000689344	0.000555942	0.000492823	0.00039955	0.001002
k__Bacteria;p__Proteobacteria;c__Gammaproteobacteria;o__Xanthomonadales;f__Xanthomonadaceae;g__Thermomonas;	0.000310545	0.000577456	0.00131866	0	0.000203759	0.00110954	0.000312219	9.02e-05	0.000628302	0.000425236	0.000652422	0.000396642	8.05e-05	0.00034348	0.000290265	0.00083682	0.0003421	7.28e-05	0.000223464	0.00366906	0.000348675	0.000315543	0.000121179	0.000197653	0.000458684	0.000223984	0.00028221	0.00032758	0.000656724	0.000270029	0.000164565	0.000159079	0.000231642	0.000646831	0.000690131	0.00134479
k__Bacteria;p__Firmicutes;c__Clostridia;o__Clostridiales;f__Lachnospiraceae;g__Lachnospira;	8.87e-05	7.7e-05	9.09e-05	0	0	0.000151301	3.9e-05	9.02e-05	0	0	0	8.81e-05	0.000120695	8.59e-05	0.000108849	0	8.55e-05	0.00116477	0.00139044	0.00228077	0.00182086	0.000856473	0.00190857	0.0033848	0.00220168	0.00176947	0.00186693	0.00171349	0.00186425	0.00143116	0.00115196	0.0010075	0.000972898	0.00126286	0.00123497	0.00126569
k__Bacteria;p__Proteobacteria;c__Gammaproteobacteria;o__Alteromonadales;f__[Chromatiaceae];g__Rheinheimera;	0.00102036	0.000731444	0.00240997	0.000523355	0.00010188	0.000151301	0.000234165	6.76e-05	0.000456947	0.00143034	0.001033	0.000418677	0.000281622	0.00051522	0.00058053	0.00334728	0.000470387	0	2.48e-05	3.31e-05	0	0	3.03e-05	2.47e-05	0	0	2.17e-05	7.56e-05	0	2.7e-05	0.000205706	2.65e-05	6.95e-05	0.000184809	0.000145291	0.00213585
k__Bacteria;p__Proteobacteria;c__Alphaproteobacteria;o__Rhizobiales;f__Bradyrhizobiaceae;g__Balneimonas;	8.87e-05	0.000115491	0.000227355	0	0.000203759	0.000100867	3.9e-05	0	0	3.87e-05	0	2.2e-05	0	0.000214675	0.000108849	0.00018596	4.28e-05	0.00024266	0.000248293	0.00333851	0.00023245	0.000202849	0.000333242	0.000296479	0.000114671	0.000134391	0.000151959	0.000176389	0.000105923	0.000108012	0.000308559	0.000742371	0.000254807	0.000338816	0.000581163	0.000158211
k__Bacteria;p__Proteobacteria;c__Gammaproteobacteria;o__Vibrionales;f__Vibrionaceae;g__Salinivibrio;	0.000221818	0.00026948	0.000591124	0.00333639	0	0	7.81e-05	0.000315621	0.00034271	0.000309262	0.000108737	6.61e-05	0.000201159	0	0.000217699	9.3e-05	4.28e-05	0.000194128	0.000173805	3.31e-05	0.0004649	9.02e-05	0.000242358	0.000247066	0.00027521	0.000179187	0.00028221	0.000226786	0.0002754	0.000243026	0.000267418	0.000132566	0.000486449	0.000308015	0.000581163	0.000395528
k__Bacteria;p__Proteobacteria;c__Betaproteobacteria;o__Burkholderiales;f__Burkholderiaceae;g__Burkholderia;	0.000399272	0.000192485	0.000500182	0.000130839	0.000458459	5.04e-05	0.000390274	2.25e-05	0.000285592	0.000231947	0.000271843	0.000396642	0.00305761	0.00124512	0.00181416	0.00055788	0.000470387	0.00024266	0.000248293	0.000760255	0.000193708	0.000202849	0.000333242	0.000370599	0.00194941	0.00071675	0.000716379	0.000226786	0.00059317	0.000810088	0.000761113	0.000848424	0.000903405	0.00110885	0.00177981	0.000949267
k__Bacteria;p__Proteobacteria;c__Alphaproteobacteria;o__Sphingomonadales;f__Sphingomonadaceae;g__Novosphingobium;	0.000798545	0.000307977	0.000318298	0	0	5.04e-05	0.00120985	6.76e-05	0.000228474	7.73e-05	0.001033	0.000308499	0.00024139	0.000601091	7.26e-05	0.00065086	0.000128287	9.71e-05	0.000173805	0.00122302	7.75e-05	0.000112694	0.000212063	7.41e-05	0.000183474	8.96e-05	0.000151959	0.000100794	0.000211846	0.000243026	0.00032913	0.000212106	0.00016215	0.00043122	0.00305111	0.000501002
k__Bacteria;p__Fusobacteria;c__Fusobacteria;o__Fusobacteriales;f__Fusobacteriaceae;g__Cetobacterium;	8.87e-05	0	4.55e-05	6.54e-05	0.00010188	0.000100867	3.9e-05	0	2.86e-05	0	0	8.81e-05	0	0	0	0	0	0.000703713	0.000124146	0.000396655	0.000619867	0.000338082	0.000666485	0.000395306	0.00288971	0.0013887	0.000521003	0.000403175	0.000233031	0.00170119	0.000473124	0.000556778	0.000509613	0.000831639	0.000581163	0.00118658
k__Bacteria;p__Verrucomicrobia;c__Verrucomicrobiae;o__Verrucomicrobiales;f__Verrucomicrobiaceae;g__Luteolibacter;	0.000133091	7.7e-05	0.000682066	0.00196258	0.00010188	0.000100867	0.000546384	9.02e-05	0.00285592	3.87e-05	0.000108737	2.2e-05	0.000281622	4.29e-05	0	0	8.55e-05	2.43e-05	2.48e-05	3.31e-05	0	0	3.03e-05	2.47e-05	0.000206408	0	4.34e-05	5.04e-05	4.24e-05	0.000405044	0.000287989	0.0015908	0.000555942	3.08e-05	0	0.000105474
k__Bacteria;p__Proteobacteria;c__Alphaproteobacteria;o__Rhizobiales;f__Hyphomicrobiaceae;g__Devosia;	0.000443636	0.000577456	0.00118225	0	0.000509398	0.00080694	7.81e-05	0	0.00282736	0.000502551	0.000434948	0.000264428	0	0.000300545	0.000253982	0.00055788	0.000128287	7.28e-05	0.000124146	0.000694146	0.000116225	0	3.03e-05	0.000395306	0.000183474	0.00029118	8.68e-05	0.000125992	0.000127108	0.000189021	0.000102853	0.000212106	6.95e-05	0.000184809	0.000108968	0.000580108
k__Bacteria;p__Firmicutes;c__Bacilli;o__Bacillales;f__Planococcaceae;g__Ureibacillus;	0.000177454	0.000192485	0.000727537	0.00281303	5.09e-05	0	0.000429302	2.25e-05	0.000314151	0	5.44e-05	0.000132214	0	8.59e-05	0	0	0	0	0	3.31e-05	0	0	3.03e-05	0	0	0	0	2.52e-05	0	0	2.06e-05	2.65e-05	2.32e-05	3.08e-05	0	0
k__Bacteria;p__Actinobacteria;c__Actinobacteria;o__Actinomycetales;f__Mycobacteriaceae;g__Mycobacterium;	0.000887272	0.000615953	0.00040924	0.000130839	0.00010188	0.000554771	0.00120985	0.000653786	0.000571184	0.000386578	0.000489317	0.000837355	0.000362086	0.000644026	0.00068938	0.00083682	0.000213812	0.000194128	0.000173805	0.000561928	0.0004649	0.000225388	0.000121179	0.000197653	0.00266037	0.000223984	0.000672962	0.000226786	0.000338954	0.00116113	0.000802255	0.000291646	0.00060227	0.00113965	0.000617486	0.00123932
k__Bacteria;p__Proteobacteria;c__Alphaproteobacteria;o__Rhizobiales;f__Brucellaceae;g__Ochrobactrum;	0.000665454	0.000615953	0.000318298	0.000588774	0.000254699	0.000554771	0.00261484	0.00036071	0.000685421	0.000270605	0.000489317	0.00085939	0.000844866	0.000472285	0.000435398	0.00130172	0.0003421	9.71e-05	2.48e-05	0.000198327	0	4.51e-05	9.09e-05	7.41e-05	4.59e-05	6.72e-05	6.51e-05	2.52e-05	0	0.000189021	0.000143994	0	0.000115821	0	3.63e-05	0.000290054
k__Bacteria;p__Actinobacteria;c__Actinobacteria;o__Actinomycetales;f__Dermabacteraceae;g__Brachybacterium;	0	7.7e-05	4.55e-05	0	0	5.04e-05	3.9e-05	0.00254751	0	0.000115973	5.44e-05	6.61e-05	0	8.59e-05	0.000108849	0	0	7.28e-05	7.45e-05	6.61e-05	0.000852317	4.51e-05	3.03e-05	0.000247066	0.000688026	0.000470367	6.51e-05	0.000125992	0.000148293	0	4.11e-05	5.3e-05	0	3.08e-05	7.26e-05	2.64e-05
k__Bacteria;p__Proteobacteria;c__Alphaproteobacteria;o__Caulobacterales;f__Caulobacteraceae;g__Brevundimonas;	0.00230691	0.00123191	0.000227355	6.54e-05	0.00015282	0.000302602	0.000819576	0.000428343	0.00131372	0.000773156	0.000815528	0.00145435	0.00225298	0.00206088	0.000979645	0.00130172	0.000898012	0.000315457	0.000148976	0.000330546	0.000193708	0.000270465	9.09e-05	0.000494132	0.000573355	0.000156789	0.000173668	0.000151191	0.000127108	0.000594065	0.000699401	0.000185593	0.000185314	0.000184809	0.000181613	0.00253138
k__Bacteria;p__Proteobacteria;c__Alphaproteobacteria;o__Caulobacterales;f__Caulobacteraceae;g__Mycoplana;	0.000310545	0.000192485	0.000318298	0	0	5.04e-05	0.000819576	2.25e-05	2.86e-05	0.000115973	0.00038058	8.81e-05	0	0.00034348	0.000253982	0.00251046	0.000684199	2.43e-05	7.45e-05	0.000297491	7.75e-05	0.000112694	0	4.94e-05	2.29e-05	2.24e-05	4.34e-05	2.52e-05	2.12e-05	0.000270029	0.000452554	2.65e-05	4.63e-05	6.16e-05	0.000108968	0.000659213
k__Bacteria;p__Firmicutes;c__Bacilli;o__Lactobacillales;f__Leuconostocaceae;g__Leuconostoc;	0.000354909	0.000115491	0.000227355	0	0	0	0	2.25e-05	0	0	0	0.000220357	0.000885098	0.00249023	0.00192301	0	0	4.85e-05	0	6.61e-05	3.87e-05	0	9.09e-05	7.41e-05	6.88e-05	0.000179187	2.17e-05	0	4.24e-05	8.1e-05	2.06e-05	5.3e-05	2.32e-05	3.08e-05	0	7.91e-05
k__Bacteria;p__Proteobacteria;c__Alphaproteobacteria;o__Sphingomonadales;f__Erythrobacteraceae;g__Erythrobacter;	0.00248436	0.00092393	0.000363769	0.000261677	0.00015282	0.000201735	0.00179526	0.00180355	0.000228474	0.000541209	0.000489317	0.0015425	0	0.00167447	0.000217699	0.00027894	0.000470387	4.85e-05	0	3.31e-05	0.000154967	0.000247926	3.03e-05	7.41e-05	0.00043575	4.48e-05	0	0.000125992	8.47e-05	2.7e-05	6.17e-05	7.95e-05	2.32e-05	6.16e-05	0.000217936	0
k__Bacteria;p__Bacteroidetes;c__Flavobacteriia;o__Flavobacteriales;f__Flavobacteriaceae;g__Polaribacter;	0.000133091	0.00246381	0	0.000261677	5.09e-05	0.000100867	0.000234165	2.25e-05	5.71e-05	0.000502551	5.44e-05	0.00015425	0	0	0.0010885	0	0	0	0	0	0	0	3.03e-05	0	4.59e-05	0.000201586	2.17e-05	0	0	5.4e-05	0	0	0	3.08e-05	0	5.27e-05
k__Bacteria;p__Proteobacteria;c__Gammaproteobacteria;o__Alteromonadales;f__Alteromonadaceae;g__Cellvibrio;	0.000443636	0.000115491	0.00240997	0.000130839	0.000254699	0.000151301	0.000195137	4.51e-05	5.71e-05	0.000270605	0.000326211	0.000132214	0.000201159	0.000128805	3.63e-05	0.00083682	0.000128287	7.28e-05	0.000273122	0.000594982	7.75e-05	4.51e-05	6.06e-05	0.000172946	0.000229342	4.48e-05	6.51e-05	0.000100794	8.47e-05	0.000243026	0.000123424	0.000132566	6.95e-05	6.16e-05	0.000326904	0.00102837
k__Bacteria;p__Firmicutes;c__Clostridia;o__Clostridiales;f__Lachnospiraceae;g__Dorea;	0.000177454	7.7e-05	0	0	0	0.000201735	0.000234165	0	2.86e-05	3.87e-05	0	0	0	0.00042935	0.000253982	0	0.00017105	0.000509585	0.000993172	0.000297491	0.00104602	0.000293004	0.000666485	0.00237183	0.0010091	0.00085114	0.000738087	0.000655159	0.000699093	0.000351038	0.000431983	0.000397699	0.000393792	0.000554426	0.000472195	0.000421896
k__Bacteria;p__Proteobacteria;c__Deltaproteobacteria;o__Syntrophobacterales;f__Syntrophobacteraceae;g__Syntrophobacter;	0.000266182	7.7e-05	0.000909422	0	0	0.000100867	0.000351247	0	8.57e-05	7.73e-05	0.000217474	0.000132214	0	0	0.000145133	9.3e-05	0.000128287	2.43e-05	4.97e-05	3.31e-05	0	0	0	0	4.59e-05	0	0	5.04e-05	0	0.000135015	8.23e-05	0.00188244	0.00233959	0	0	0
k__Bacteria;p__Bacteroidetes;c__Sphingobacteriia;o__Sphingobacteriales;f__Flexibacteraceae;g__Arcicella;	0	0	0	0	0	0	0	0	0	0	0	2.2e-05	4.02e-05	0	3.63e-05	0	0	0	0	0	0	2.25e-05	3.03e-05	0	2.29e-05	0	2.17e-05	0	2.12e-05	0.000405044	0.000246848	0	0	0.000338816	0.00228833	0
k__Bacteria;p__Proteobacteria;c__Gammaproteobacteria;o__Alteromonadales;f__Alteromonadaceae;g__HB2-32-21;	0	0.000192485	0	0	0	0	7.81e-05	0	0	7.73e-05	0.00038058	0	0	0	7.26e-05	0.00130172	0.000256575	0.000194128	0.000173805	0.00228077	0.000348675	2.25e-05	9.09e-05	0.000172946	0.000114671	0.000111992	0.000108542	0.000125992	0.000105923	0.000108012	0.000123424	0.000132566	0.000254807	0.00021561	0.000435872	0.000158211
k__Bacteria;p__Actinobacteria;c__Nitriliruptoria;o__Euzebyales;f__Euzebyaceae;g__Euzebya;	0.000354909	0.00227133	0	0	5.09e-05	0.000100867	3.9e-05	0.00015781	0	0.000115973	0	2.2e-05	0	0	0.00116106	9.3e-05	0	2.43e-05	2.48e-05	0.000165273	0.000154967	0	3.03e-05	2.47e-05	2.29e-05	0	6.51e-05	5.04e-05	0	5.4e-05	0.000123424	2.65e-05	0	6.16e-05	7.26e-05	5.27e-05
k__Bacteria;p__Proteobacteria;c__Gammaproteobacteria;o__Xanthomonadales;f__Xanthomonadaceae;g__Pseudoxanthomonas;	0.000133091	0.000230982	4.55e-05	0.000196258	0	0	3.9e-05	0.000180355	0.000114237	0.000154631	0.000489317	0.000110178	0.000120695	0.00115925	0.00123363	0.00204556	0.000555912	9.71e-05	0.000248293	0.00224771	0.000154967	0.000112694	0.000212063	0.000222359	6.88e-05	0.000201586	0.000108542	0.000201588	2.12e-05	0.000108012	0.000226277	0.000132566	4.63e-05	0.000154007	0.00039955	0.000237317
k__Bacteria;p__Verrucomicrobia;c__Verrucomicrobiae;o__Verrucomicrobiales;f__Verrucomicrobiaceae;g__Rubritalea;	0.000532363	0.00092393	0.000591124	6.54e-05	0.000815037	0.00211822	0.00117082	0.000293077	0.000199914	0.000231947	0.000217474	0.000264428	0.00136788	4.29e-05	0.000399115	0	8.55e-05	0	0	0	7.75e-05	4.51e-05	0	4.94e-05	6.88e-05	0	0	2.52e-05	2.12e-05	0	2.06e-05	0.000106053	6.95e-05	0.000154007	7.26e-05	0.000131843
k__Bacteria;p__Proteobacteria;c__Gammaproteobacteria;o__Alteromonadales;f__Idiomarinaceae;g__Idiomarina;	0.000399272	0.00207884	0.000136413	0	0.000356579	0.000302602	0.000117082	0.000135266	5.71e-05	0.000231947	0.000163106	0.000242392	0	0	0.00163274	0	0	0	2.48e-05	0	0	0	0	2.47e-05	0	0	0	0	0	0	0	2.65e-05	0	0	0	0
k__Bacteria;p__Verrucomicrobia;c__[Spartobacteria];o__[Chthoniobacterales];f__[Chthoniobacteraceae];g__Candidatus Xiphinematobacter;	0.000399272	0.000230982	4.55e-05	0	0	0.000151301	0.000507357	0.000721419	0.000171355	0.000154631	0.000163106	0.000308499	4.02e-05	0.00042935	7.26e-05	0.00027894	0.000128287	2.43e-05	0	0	0	4.51e-05	6.06e-05	2.47e-05	0.00121551	2.24e-05	2.17e-05	5.04e-05	4.24e-05	0.00137715	0.00063769	0.00206803	0.00060227	0	0	0
k__Archaea;p__Crenarchaeota;c__Thaumarchaeota;o__Cenarchaeales;f__Cenarchaeaceae;g__Nitrosopumilus;	0.000665454	0.00092393	4.55e-05	0.000130839	0	0.000252169	0.000780549	0.000631242	0.000257033	0.000193289	0.000598054	0.00165267	0	0.000128805	0.000108849	0.00204556	0.00115459	0	0	0	0	0	0	0	4.59e-05	0	2.17e-05	5.04e-05	0	0	4.11e-05	2.65e-05	0	0	0	0.000105474
k__Bacteria;p__SAR406;c__AB16;o__Arctic96B-7;f__A714017;g__SGSH944;	0.00102036	0.000230982	0	0.000196258	0.00015282	0.000252169	0.00202943	4.51e-05	2.86e-05	0.000270605	0.000326211	0.000947533	4.02e-05	0.000644026	7.26e-05	0	0.0003421	0	0	0	0	0	0	0	0.000137605	0	0	0	0	0	0	0	0	0	0	2.64e-05
k__Bacteria;p__Proteobacteria;c__Gammaproteobacteria;o__Xanthomonadales;f__Sinobacteraceae;g__Steroidobacter;	0.000221818	3.85e-05	9.09e-05	0.000457935	0.000611278	0.000302602	3.9e-05	0	2.86e-05	0.000193289	5.44e-05	8.81e-05	4.02e-05	0.00017174	0.000181416	0	4.28e-05	0.00012133	0.000124146	0.00201633	0.000116225	0.000112694	3.03e-05	0.00014824	0.000573355	6.72e-05	0.000108542	0.000151191	0.000360139	0.000108012	0.000143994	0.000132566	0.00044012	0.000154007	0.000254259	0.000237317
k__Bacteria;p__Proteobacteria;c__Gammaproteobacteria;o__Pseudomonadales;f__Moraxellaceae;g__Enhydrobacter;	0.000754181	0.000885433	0.000181884	0.000392516	0.000407519	0.000706072	0.000624439	6.76e-05	0.00131372	0.00193289	0.000489317	0.00066107	0.000683939	0.00107338	0.00101593	0.00037192	0	9.71e-05	0.000297952	0.000396655	0.000193708	6.76e-05	0.000181769	0.000197653	0.000550421	0.000246383	0.000521003	0.000125992	0.000296585	0.000486053	0.000370271	0.000212106	0.000277971	0.000616029	0.000581163	0.000395528
k__Bacteria;p__Proteobacteria;c__Alphaproteobacteria;o__Rhodobacterales;f__Rhodobacteraceae;g__Rubellimicrobium;	4.44e-05	0.000153988	0	6.54e-05	0.000611278	0	3.9e-05	0	0	0	0	0.00015425	0	0.00025761	0.000145133	0.00018596	4.28e-05	0.00012133	0.000198634	0.00155356	0.000309933	4.51e-05	0.000242358	0.000222359	2.29e-05	0.000246383	0.00193205	0.000302381	0.000127108	5.4e-05	0.000123424	0.000238619	0.000347464	0.000246412	0.000472195	7.91e-05
k__Bacteria;p__Proteobacteria;c__Gammaproteobacteria;o__Xanthomonadales;f__Xanthomonadaceae;g__Dokdonella;	0	0.00026948	0.000272826	6.54e-05	0	0.000201735	0	0.000450887	0.00034271	0.000115973	5.44e-05	0.00015425	0	0.000214675	0.000145133	9.3e-05	0	7.28e-05	0	0.000231382	0	0	0	2.47e-05	0	2.24e-05	4.34e-05	5.04e-05	4.24e-05	2.7e-05	2.06e-05	0	4.63e-05	0.00190969	0.000181613	0.000421896
k__Bacteria;p__Proteobacteria;c__Gammaproteobacteria;o__Aeromonadales;f__Succinivibrionaceae;g__Anaerobiospirillum;	0	3.85e-05	0	0	0	0	0	2.25e-05	0	0	0	8.81e-05	0	8.59e-05	7.26e-05	9.3e-05	0.000128287	0.0011405	0.000670391	0.000958583	0.0013947	0.00054093	0.000605895	0.00121062	0.00110084	0.000940734	0.00182351	0.000932342	0.00120753	0.00170119	0.00158394	0.00132566	0.001552	0.00141687	0.00108968	0.00189853
k__Bacteria;p__Proteobacteria;c__Betaproteobacteria;o__Rhodocyclales;f__Rhodocyclaceae;g__Thauera;	0	0.000115491	0.00186431	6.54e-05	0	0.000302602	3.9e-05	0.000631242	2.86e-05	0.000115973	0.000217474	0.000110178	0.000965562	0	7.26e-05	0.0004649	0	0	0	3.31e-05	0	6.76e-05	0	0	0	2.24e-05	0	0	0	0	0	0	0	0.000123206	3.63e-05	0.000105474
k__Bacteria;p__Proteobacteria;c__Betaproteobacteria;o__Burkholderiales;f__Comamonadaceae;g__Comamonas;	0.000133091	7.7e-05	0.00186431	6.54e-05	0	0.000958241	3.9e-05	4.51e-05	8.57e-05	0.000386578	0.000271843	0.00015425	4.02e-05	4.29e-05	0.000217699	9.3e-05	0.000128287	2.43e-05	4.97e-05	0.000165273	7.75e-05	0.000157771	0	4.94e-05	0	0	4.34e-05	2.52e-05	0	2.7e-05	0.000185136	7.95e-05	0.000115821	9.24e-05	0.000363227	0.000316422
k__Bacteria;p__Proteobacteria;c__Alphaproteobacteria;o__Rhodospirillales;f__Rhodospirillaceae;g__Skermanella;	4.44e-05	0	4.55e-05	0	0.000713158	0	0	0	0	0	0	2.2e-05	0	0.00034348	0.000290265	9.3e-05	0	7.28e-05	7.45e-05	0.001818	0.00023245	0.000135233	9.09e-05	0.000321186	6.88e-05	0.000179187	0.000217085	0.000151191	0.000169477	0.000297032	0.000205706	0.000185593	0.000416956	3.08e-05	0.000290582	0.000131843
k__Bacteria;p__Thermi;c__Deinococci;o__Deinococcales;f__Deinococcaceae;g__Deinococcus;	0.000177454	0.000423468	0	0.000327097	0	0	0.000195137	6.76e-05	0	0.000193289	0.000326211	0	0.00024139	0.000386415	0.000399115	0.00027894	0	4.85e-05	7.45e-05	9.92e-05	0.000154967	0.000157771	0.000272653	0.000222359	0.000160539	0.000201586	0.00178009	0.000100794	8.47e-05	0.000189021	4.11e-05	5.3e-05	6.95e-05	0.000123206	7.26e-05	0.000659213
k__Bacteria;p__Proteobacteria;c__Gammaproteobacteria;o__Thiotrichales;f__Piscirickettsiaceae;g__Methylophaga;	4.44e-05	0.000692947	0.000227355	0	0	0.00176518	0.000429302	9.02e-05	5.71e-05	3.87e-05	5.44e-05	0.00015425	0.000402317	0.000558156	0.000907079	0	0	2.43e-05	0	0.000132218	0	0	0	4.94e-05	0	2.24e-05	4.34e-05	0	2.12e-05	2.7e-05	2.06e-05	5.3e-05	0	0	0	2.64e-05
k__Bacteria;p__Firmicutes;c__Bacilli;o__Lactobacillales;f__Leuconostocaceae;g__Weissella;	0.00119782	0.000769941	0.000500182	0.000457935	0.000203759	0.000554771	0.000390274	0.000202899	0.00071398	0.000309262	0.000271843	0.000881426	8.05e-05	0.00176034	0.000544247	0.0004649	0.000855249	4.85e-05	4.97e-05	0.000165273	3.87e-05	2.25e-05	0	2.47e-05	4.59e-05	2.24e-05	0	0	0.000105923	2.7e-05	0	2.65e-05	0	3.08e-05	7.26e-05	0
k__Bacteria;p__Verrucomicrobia;c__Verrucomicrobiae;o__Verrucomicrobiales;f__Verrucomicrobiaceae;g__MSBL3;	0.00150836	0.000885433	9.09e-05	6.54e-05	0.00010188	0.000100867	0.000663466	0.000247988	8.57e-05	0.000579867	0.000271843	0.00171878	0.000804635	0.000686961	0.000108849	0	0.000555912	0	0	0	0	0	0	0	2.29e-05	0	0	0	0	2.7e-05	0	0	2.32e-05	0	0	0
k__Bacteria;p__Planctomycetes;c__Planctomycetia;o__Planctomycetales;f__Planctomycetaceae;g__Planctomyces;	0.000310545	7.7e-05	0	0.000523355	0	0.000100867	0.000312219	0	0.00171355	0.000193289	0.000217474	0.00145435	4.02e-05	8.59e-05	0.000108849	0.00018596	0.000128287	0	2.48e-05	9.92e-05	7.75e-05	0	0	2.47e-05	0.000550421	4.48e-05	0	0	0	2.7e-05	0.000102853	7.95e-05	9.27e-05	0.000184809	3.63e-05	0.000158211
k__Bacteria;p__Proteobacteria;c__Alphaproteobacteria;o__Rhodobacterales;f__Rhodobacteraceae;g__Phaeobacter;	0.000221818	0.000423468	0.000227355	0.0017009	5.09e-05	0.000100867	3.9e-05	0	0.000114237	0.000154631	5.44e-05	0.000198321	0	0.000128805	0.000362832	0	0	0	0	0	3.87e-05	4.51e-05	0	2.47e-05	0	8.96e-05	0	0	4.24e-05	2.7e-05	0	0	6.95e-05	0	3.63e-05	0.000131843
k__Bacteria;p__Firmicutes;c__Bacilli;o__Bacillales;f__Paenibacillaceae;g__Brevibacillus;	4.44e-05	0	9.09e-05	0	0	0	0	4.51e-05	0	0	0	0	0	0	0	9.3e-05	0	0.00024266	0.000372439	0.000495819	0.00104602	0.000157771	0.000817959	0.000864731	0.000504552	0.000582359	0.000347335	0.000831548	0.000508431	0.00045905	0.000473124	0.000927964	0.00132036	0.000708433	0.000472195	0.00166122
k__Bacteria;p__Actinobacteria;c__Actinobacteria;o__Actinomycetales;f__Nocardioidaceae;g__Nocardioides;	0.00164145	0.00150139	0.000181884	0.000261677	0.000356579	0.000100867	0.000741521	0.000541065	0.000171355	0.000231947	0.000108737	0.00134417	0.000402317	0.000686961	0.000435398	0.00018596	0.000256575	9.71e-05	0.000198634	0.000991637	7.75e-05	4.51e-05	9.09e-05	0.00014824	9.17e-05	0.000156789	6.51e-05	0.000201588	0.000169477	0.000216024	4.11e-05	5.3e-05	0.000115821	6.16e-05	0.000254259	0.00018458
k__Bacteria;p__Proteobacteria;c__Deltaproteobacteria;o__Myxococcales;f__Nannocystaceae;g__Plesiocystis;	4.44e-05	3.85e-05	0	0.00163548	0	0	0	4.51e-05	0.000171355	0	5.44e-05	0.000110178	0	0	0	0	8.55e-05	2.43e-05	4.97e-05	6.61e-05	0	0	0	0	0	0	0	0	2.12e-05	2.7e-05	2.06e-05	5.3e-05	0	0	0	2.64e-05
k__Bacteria;p__Proteobacteria;c__Gammaproteobacteria;o__Pasteurellales;f__Pasteurellaceae;g__Haemophilus;	0.00102036	0.00065445	0.000181884	0.00163548	0.00015282	0	0.000741521	6.76e-05	8.57e-05	0.000270605	0.00038058	0.000286463	0.000120695	0.000987506	0.00101593	0.00027894	0	0.000266926	0.000273122	0.000694146	0.000193708	9.02e-05	0.000212063	0.000222359	0.000206408	0.000403172	0.000803213	0.00032758	0.000381324	0.000297032	0.00032913	0.000265132	0.000486449	0.000677632	0.000581163	0.000553739
k__Bacteria;p__Firmicutes;c__Bacilli;o__Lactobacillales;f__Carnobacteriaceae;g__Trichococcus;	0	0	0	0	0	0	0	0	0	0	0	0	0	0.00017174	7.26e-05	0	4.28e-05	0.000194128	0.000397269	0.000528873	0.000387417	0.00018031	0.000484716	0.000691785	0.000344013	0.000380773	0.000325627	0.000503969	0.00133463	0.000243026	0.000287989	0.000503752	0.000416956	0.000770036	0.000762777	0.00163485
k__Bacteria;p__Proteobacteria;c__Alphaproteobacteria;o__Caulobacterales;f__Caulobacteraceae;g__Asticcacaulis;	0.000221818	7.7e-05	0.000727537	0	0.00157913	0.000201735	0.000117082	2.25e-05	2.86e-05	0.000154631	0.00152232	0.000198321	0	4.29e-05	0	0.00037192	4.28e-05	0	0	3.31e-05	0	0	6.06e-05	9.88e-05	0.000114671	2.24e-05	0	2.52e-05	2.12e-05	0	2.06e-05	0	0	3.08e-05	0	7.91e-05
k__Bacteria;p__Planctomycetes;c__Planctomycetia;o__Gemmatales;f__Gemmataceae;g__Gemmata;	0.000266182	7.7e-05	0	0.00157006	0.00015282	0.000100867	3.9e-05	0.00015781	0.0013994	0	5.44e-05	0.000440713	0	4.29e-05	0	9.3e-05	0.00017105	0	0	0.000297491	7.75e-05	0	0	2.47e-05	2.29e-05	0.000156789	0	0.000100794	6.36e-05	0	4.11e-05	2.65e-05	2.32e-05	0.000154007	3.63e-05	0.000237317
k__Bacteria;p__Proteobacteria;c__Alphaproteobacteria;o__Rhodobacterales;f__Hyphomonadaceae;g__Hyphomonas;	0.000133091	0.000153988	4.55e-05	6.54e-05	0	5.04e-05	3.9e-05	2.25e-05	0.000199914	0	5.44e-05	4.41e-05	0.00156904	4.29e-05	7.26e-05	0.00037192	0.000128287	2.43e-05	2.48e-05	9.92e-05	0	0	0	0	0	2.24e-05	2.17e-05	2.52e-05	4.24e-05	0.000567062	0.00032913	5.3e-05	6.95e-05	0	0	0
k__Bacteria;p__Proteobacteria;c__Deltaproteobacteria;o__Syntrophobacterales;f__Syntrophaceae;g__Desulfobacca;	4.44e-05	3.85e-05	0.00127319	0	0	0	0	2.25e-05	5.71e-05	7.73e-05	0	0.000639034	0	0	0	0.0004649	0.000213812	2.43e-05	4.97e-05	3.31e-05	3.87e-05	0	3.03e-05	0	2.29e-05	4.48e-05	2.17e-05	2.52e-05	2.12e-05	8.1e-05	2.06e-05	0.000927964	0.001552	3.08e-05	7.26e-05	0
k__Bacteria;p__Proteobacteria;c__Betaproteobacteria;o__Neisseriales;f__Neisseriaceae;g__Neisseria;	0.00062109	0.000307977	0	0.00117755	5.09e-05	0.000151301	0.000195137	6.76e-05	8.57e-05	0.000115973	0.000163106	0.000264428	4.02e-05	0.00154566	0.00123363	0.00037192	4.28e-05	2.43e-05	4.97e-05	0.000132218	0	9.02e-05	0	7.41e-05	2.29e-05	2.24e-05	6.51e-05	7.56e-05	8.47e-05	5.4e-05	4.11e-05	5.3e-05	9.27e-05	0.000123206	0.000217936	0.000131843
k__Bacteria;p__Proteobacteria;c__Betaproteobacteria;o__Methylophilales;f__Methylophilaceae;g__Methylotenera;	8.87e-05	0.000846936	0.000454711	6.54e-05	5.09e-05	0	3.9e-05	0.000180355	8.57e-05	0.000193289	0.000108737	0.000176285	4.02e-05	4.29e-05	0.000761946	0.00065086	0	2.43e-05	7.45e-05	0.000396655	7.75e-05	2.25e-05	6.06e-05	7.41e-05	0	8.96e-05	0.000108542	2.52e-05	2.12e-05	0.000135015	0.000102853	0.000132566	0.00016215	9.24e-05	0.00152555	0.000290054
k__Bacteria;p__Bacteroidetes;c__Bacteroidia;o__Bacteroidales;f__[Paraprevotellaceae];g__YRC22;	0	3.85e-05	0.00150055	0	0	0	0	0	0	3.87e-05	0	0.000176285	0	0	0.000181416	0.00018596	0.0013684	2.43e-05	2.48e-05	0	0	0	0	2.47e-05	0	0	2.17e-05	5.04e-05	4.24e-05	0	4.11e-05	2.65e-05	2.32e-05	0	0	2.64e-05
k__Bacteria;p__Bacteroidetes;c__Flavobacteriia;o__Flavobacteriales;f__Cryomorphaceae;g__Fluviicola;	0	7.7e-05	4.55e-05	0	0	0	0.000117082	2.25e-05	2.86e-05	0	5.44e-05	0.000198321	0	8.59e-05	7.26e-05	0.00027894	8.55e-05	0	0	0	0	0	0	0	0	0	0	0	0	0.000405044	0.000267418	0	0	0.000123206	0.00148923	0
k__Bacteria;p__Nitrospirae;c__Nitrospira;o__Nitrospirales;f__Nitrospiraceae;g__Nitrospira;	0.000488	0.000307977	0.000181884	0.000915871	0	0.000151301	0.000312219	4.51e-05	0.000142796	0.000115973	0.00038058	0.00050682	0.000362086	0.00017174	0.000326548	0.00120874	0.000213812	0.00012133	0.000223464	0.000628037	7.75e-05	4.51e-05	0.000181769	0.000123533	0.000366947	0.000268781	8.68e-05	0.000151191	0.000148293	5.4e-05	6.17e-05	0.000212106	0.000115821	0.00147847	0.000217936	0.000342791
k__Bacteria;p__Proteobacteria;c__Betaproteobacteria;o__Rhodocyclales;f__Rhodocyclaceae;g__Candidatus Accumulibacter;	0	0	0.000181884	0	0	0	0	0	0	0	5.44e-05	0	0	0	0	0	0	0	2.48e-05	0	0	0	0	0	0	0	0	0	0	0	0	2.65e-05	9.27e-05	0.00144767	0.000108968	0.000290054
k__Bacteria;p__Firmicutes;c__Bacilli;o__Lactobacillales;f__Aerococcaceae;g__Alloiococcus;	0	0	0	0	0	0	0	0	0	0	0	0	0	0.000901636	0.00141504	0	0	0	0	3.31e-05	0	0	0	2.47e-05	0	2.24e-05	0	0	0	0	0	0	0	0	0	2.64e-05
k__Bacteria;p__Proteobacteria;c__Gammaproteobacteria;o__Alteromonadales;f__[Chromatiaceae];g__Alishewanella;	0	0.000192485	9.09e-05	0	0.000203759	0	0.00015611	0	0	3.87e-05	0.00038058	0	0	8.59e-05	0.000217699	0.0013947	0.000384862	2.43e-05	0	0	0	0	3.03e-05	4.94e-05	0	0	0	2.52e-05	0	2.7e-05	6.17e-05	0	0	3.08e-05	3.63e-05	2.64e-05
k__Bacteria;p__Firmicutes;c__Erysipelotrichi;o__Erysipelotrichales;f__[Coprobacillaceae];g__Coprobacillus;	0	3.85e-05	4.55e-05	0	0	0.00136171	0	0	0	0	0	2.2e-05	0	0	0	0	0	4.85e-05	4.97e-05	6.61e-05	0.000116225	4.51e-05	0.000181769	7.41e-05	9.17e-05	0.000268781	0.000151959	0.000125992	8.47e-05	2.7e-05	4.11e-05	2.65e-05	9.27e-05	6.16e-05	3.63e-05	5.27e-05
k__Bacteria;p__Proteobacteria;c__Alphaproteobacteria;o__Rhodospirillales;f__Acetobacteraceae;g__Roseomonas;	0.000177454	0.000307977	0.000591124	6.54e-05	0	0	0.000117082	0.000721419	0.00034271	7.73e-05	0.000108737	0.000286463	0	0.000300545	0.000399115	0.00018596	0	0.00024266	4.97e-05	0.000429709	0.000271192	2.25e-05	9.09e-05	0.000123533	0.000183474	0.000335976	0.00132422	0.000251984	8.47e-05	0.000945103	0.000822825	0.000212106	0.00060227	9.24e-05	0.000254259	0.000210948
k__Bacteria;p__Proteobacteria;c__Deltaproteobacteria;o__Myxococcales;f__Myxococcaceae;g__Anaeromyxobacter;	8.87e-05	0.000115491	9.09e-05	0	0	0	7.81e-05	0	5.71e-05	0.000154631	5.44e-05	0.000727177	0	0.00025761	0.000217699	9.3e-05	0.00017105	2.43e-05	2.48e-05	6.61e-05	3.87e-05	0	0	2.47e-05	2.29e-05	0	2.17e-05	2.52e-05	0	2.7e-05	2.06e-05	0.000424212	0.00132036	0	0	0
k__Bacteria;p__Proteobacteria;c__Alphaproteobacteria;o__Rhodospirillales;f__Rhodospirillaceae;g__Magnetospirillum;	4.44e-05	0.000423468	0.00109131	0	5.09e-05	5.04e-05	3.9e-05	2.25e-05	2.86e-05	7.73e-05	0.000815528	2.2e-05	0	8.59e-05	0.000253982	0.00130172	0.00017105	2.43e-05	4.97e-05	9.92e-05	7.75e-05	2.25e-05	3.03e-05	0	0	0	6.51e-05	2.52e-05	0	0	0	5.3e-05	6.95e-05	0	3.63e-05	5.27e-05
k__Bacteria;p__Chloroflexi;c__Anaerolineae;o__Anaerolineales;f__Anaerolinaceae;g__Anaerolinea;	4.44e-05	3.85e-05	0	0.000457935	0	0	0	0	0	0	5.44e-05	0.000242392	0	8.59e-05	7.26e-05	0	4.28e-05	0	2.48e-05	0.000264437	0	0	0	0	4.59e-05	0	2.17e-05	0	2.12e-05	5.4e-05	0	0.00129915	0.00115821	0	7.26e-05	7.91e-05
k__Bacteria;p__Spirochaetes;c__Spirochaetes;o__Spirochaetales;f__Spirochaetaceae;g__Treponema;	0.000266182	0.000384971	9.09e-05	0.000457935	5.09e-05	0.000151301	3.9e-05	0	5.71e-05	0.000154631	0	0.000594963	0	0.00111631	0.0010885	0.0004649	0.00128287	0	4.97e-05	0.000165273	0	2.25e-05	3.03e-05	2.47e-05	0	0	2.17e-05	2.52e-05	2.12e-05	0	0.000102853	0.000344672	0.000138985	6.16e-05	0.000181613	2.64e-05
k__Bacteria;p__Proteobacteria;c__Betaproteobacteria;o__Rhodocyclales;f__Rhodocyclaceae;g__Hydrogenophilus;	0.000310545	0.000461965	4.55e-05	0	0	5.04e-05	0.00015611	2.25e-05	0.000828216	0.000463894	0.000271843	0.000220357	0.00092533	0.00017174	0.000326548	0.0004649	0.000213812	0.000218394	0.000273122	0.000760255	0.000309933	0.000157771	0.000393832	0.000543545	0.000298145	0.000358375	0.000781504	0.000377977	0.000529616	0.000783085	0.000863966	0.00090145	0.00127403	0.000800838	0.001126	0.000870161
k__Bacteria;p__Proteobacteria;c__Deltaproteobacteria;o__Syntrophobacterales;f__Desulfobacteraceae;g__Desulfobacterium;	0.000133091	0.000192485	0	0	5.09e-05	0.000252169	7.81e-05	2.25e-05	2.86e-05	3.87e-05	0.000163106	0.000308499	0	0	7.26e-05	0	8.55e-05	0	0	0	0	6.76e-05	0	0	4.59e-05	6.72e-05	2.17e-05	0	0	5.4e-05	2.06e-05	0.000450725	0.00127403	0	0	5.27e-05
k__Bacteria;p__Proteobacteria;c__Gammaproteobacteria;o__Xanthomonadales;f__Xanthomonadaceae;g__Xylella;	0.000266182	0.000384971	0.00122772	0.000130839	0	5.04e-05	0	9.02e-05	0.000428388	0.000154631	0.000108737	0.000110178	0.000643708	0.00115925	0.00126991	0	0	0	0	0	0	0	3.03e-05	2.47e-05	0.000458684	0	4.34e-05	0	0	0	0	0	2.32e-05	0	7.26e-05	2.64e-05
k__Bacteria;p__Proteobacteria;c__Alphaproteobacteria;o__Caulobacterales;f__Caulobacteraceae;g__Phenylobacterium;	0.000133091	0.000192485	0.000181884	6.54e-05	0.00015282	0	3.9e-05	0	0.000771098	7.73e-05	0.000217474	0.000374606	8.05e-05	0.00025761	0.000145133	0.00065086	0.000213812	0.00012133	9.93e-05	0.00125607	0.000271192	0.000135233	0.000212063	0.000271773	0.000344013	8.96e-05	6.51e-05	0.000176389	0.000211846	0.000216024	0.000164565	0.000159079	6.95e-05	0.000246412	0.000181613	0.000263685
k__Bacteria;p__Actinobacteria;c__Rubrobacteria;o__Rubrobacterales;f__Rubrobacteraceae;g__Rubrobacter;	8.87e-05	3.85e-05	0.000363769	0	0	0	0	0	0.000257033	3.87e-05	0.000108737	8.81e-05	0.00124718	0.000386415	0.000217699	0	4.28e-05	0.000145596	4.97e-05	0.000198327	0.000193708	6.76e-05	9.09e-05	7.41e-05	0.000252276	0.000134391	6.51e-05	0.000277183	0.000190662	8.1e-05	6.17e-05	0.000132566	4.63e-05	3.08e-05	0.000108968	0.00018458
k__Bacteria;p__Fibrobacteres;c__Fibrobacteria;o__Fibrobacterales;f__Fibrobacteraceae;g__Fibrobacter;	0	7.7e-05	0	0	0	0	0	0	0	0	0	0.000198321	0.00024139	0	0.000145133	0.00018596	0.00124011	0	0	0	0	0	3.03e-05	0	0	0	0	5.04e-05	6.36e-05	0	4.11e-05	0	2.32e-05	0	3.63e-05	2.64e-05
k__Bacteria;p__Firmicutes;c__Clostridia;o__Clostridiales;f__Veillonellaceae;g__Dialister;	8.87e-05	0.000423468	0.000363769	6.54e-05	0	5.04e-05	0.000195137	0.000180355	2.86e-05	0.000115973	0.00038058	8.81e-05	0	0	3.63e-05	0	4.28e-05	0.000873574	0.000794538	0.00079331	0.000968542	0.000315543	0.000666485	0.000716492	0.000642158	0.00071675	0.00104201	0.000781152	0.000932124	0.00116113	0.000925678	0.000874937	0.00060227	0.000985647	0.000617486	0.00121295
k__Bacteria;p__Proteobacteria;c__Alphaproteobacteria;o__Rhizobiales;f__Methylocystaceae;g__Methylosinus;	0.000221818	0.000230982	0.000591124	0.000261677	0.00010188	0.000151301	0.000468329	4.51e-05	0.000456947	0.00119839	0	0.000330535	0.000523013	8.59e-05	0.000290265	9.3e-05	0.000213812	0	0	0.000165273	0	0	0	0	0.000504552	2.24e-05	0	0	4.24e-05	0.000162018	0.000123424	0.000397699	0.000718091	0.000123206	0.000181613	7.91e-05
k__Bacteria;p__Proteobacteria;c__Gammaproteobacteria;o__Xanthomonadales;f__Xanthomonadaceae;g__Arenimonas;	0	0.000153988	0	0	0	0.000353036	0	0	0	3.87e-05	5.44e-05	6.61e-05	0	0	3.63e-05	0.00065086	4.28e-05	9.71e-05	0.000124146	0.00118997	0.000116225	0.00018031	3.03e-05	4.94e-05	2.29e-05	6.72e-05	8.68e-05	5.04e-05	0.000148293	5.4e-05	0.000123424	2.65e-05	0.000138985	0.000184809	0.00039955	2.64e-05
k__Bacteria;p__Actinobacteria;c__Actinobacteria;o__Actinomycetales;f__Streptomycetaceae;g__Streptomyces;	8.87e-05	0.00026948	0	0	0	0	0.000234165	0	2.86e-05	0.00034792	0.000163106	0.000132214	0.000321854	0.00051522	0.000290265	9.3e-05	0.00017105	9.71e-05	9.93e-05	0.000991637	0.000193708	9.02e-05	0.000121179	0.000172946	0.00116964	8.96e-05	6.51e-05	0.000151191	0.000211846	0.000189021	6.17e-05	0.000159079	0.000185314	9.24e-05	0.000290582	0.000105474
k__Bacteria;p__Proteobacteria;c__Betaproteobacteria;o__Rhodocyclales;f__Rhodocyclaceae;g__C39;	4.44e-05	7.7e-05	0	0	0.00015282	0	3.9e-05	0	5.71e-05	0	5.44e-05	6.61e-05	0	0	3.63e-05	0	0	0	0	0	0	0	0	0	0	0	0	0	2.12e-05	0	0	0	0	6.16e-05	0.000217936	0.00116022
k__Bacteria;p__Verrucomicrobia;c__Verrucomicrobiae;o__Verrucomicrobiales;f__Verrucomicrobiaceae;g__Verrucomicrobium;	0.000133091	3.85e-05	4.55e-05	0.000196258	5.09e-05	0	0.000312219	0.00114976	2.86e-05	3.87e-05	5.44e-05	6.61e-05	0.000482781	8.59e-05	0	0	0.000128287	0	0	0	0	0	0	2.47e-05	0	0	0	0	0	0	2.06e-05	5.3e-05	2.32e-05	0	0	0
k__Bacteria;p__Bacteroidetes;c__Sphingobacteriia;o__Sphingobacteriales;f__Sphingobacteriaceae;g__Sphingobacterium;	8.87e-05	0.00026948	0.00113678	0.000196258	0.000305639	0.000453904	0.000273192	0.000202899	0.000142796	7.73e-05	0.000163106	0.000176285	0	4.29e-05	0.000145133	9.3e-05	4.28e-05	4.85e-05	2.48e-05	6.61e-05	0	4.51e-05	3.03e-05	4.94e-05	2.29e-05	8.96e-05	2.17e-05	2.52e-05	2.12e-05	0	6.17e-05	0	2.32e-05	6.16e-05	3.63e-05	0
k__Bacteria;p__Proteobacteria;c__Epsilonproteobacteria;o__Campylobacterales;f__Campylobacteraceae;g__Campylobacter;	0	0	0	6.54e-05	0	0	0	0	0	0	0	2.2e-05	0	0	0	0	0	0.000412521	0.000496586	0.000495819	0.000542383	0.000383159	0.000515011	0.000494132	0.000665092	0.000985531	0.000586128	0.000529167	0.000720278	0.000945103	0.00063769	0.000768884	0.000486449	0.000585228	0.00039955	0.00113385
k__Bacteria;p__Actinobacteria;c__Thermoleophilia;o__Solirubrobacterales;f__Conexibacteraceae;g__Conexibacter;	0	3.85e-05	0	0	0.000356579	0	0	0	0	0	0.000163106	4.41e-05	0	4.29e-05	0	0.00027894	0.000213812	2.43e-05	4.97e-05	0.000429709	7.75e-05	0	3.03e-05	7.41e-05	0.00112378	2.24e-05	0	0.000125992	0.000127108	5.4e-05	8.23e-05	0.000106053	9.27e-05	3.08e-05	0.000108968	0.00018458
k__Bacteria;p__Gemmatimonadetes;c__Gemmatimonadetes;o__Gemmatimonadales;f__Gemmatimonadaceae;g__Gemmatimonas;	0.000133091	0	0	0	0	0	0	2.25e-05	2.86e-05	0	0.000108737	0	0	4.29e-05	0	0.00111576	0.00017105	0	4.97e-05	6.61e-05	3.87e-05	2.25e-05	0	0	0	0	0	0	2.12e-05	0	0	0	2.32e-05	3.08e-05	0	2.64e-05
k__Bacteria;p__Actinobacteria;c__Actinobacteria;o__Actinomycetales;f__Micrococcaceae;g__Kocuria;	0	0.000500462	0	0.000654193	0	0.000453904	0.000234165	0.000428343	0.000199914	7.73e-05	0	0.00015425	0.000563244	0.000214675	0.00058053	0	4.28e-05	0.00012133	0.000124146	0.000165273	0.000154967	6.76e-05	6.06e-05	7.41e-05	0.00110084	0.000268781	6.51e-05	5.04e-05	6.36e-05	0.000324035	0.000123424	0.000106053	0.000185314	6.16e-05	7.26e-05	0.00018458
k__Bacteria;p__Bacteroidetes;c__Sphingobacteriia;o__Sphingobacteriales;f__Chitinophagaceae;g__Flavisolibacter;	0	3.85e-05	0	0	0	0	0.00015611	0	2.86e-05	3.87e-05	0	2.2e-05	4.02e-05	0	0	0	4.28e-05	0.000218394	0.000173805	0.0010908	0.000193708	4.51e-05	0.000181769	0.000123533	0.000206408	6.72e-05	8.68e-05	7.56e-05	0.000296585	0.000162018	0.000102853	2.65e-05	0.000231642	0.000123206	0.000217936	0.000158211
k__Bacteria;p__Proteobacteria;c__Alphaproteobacteria;o__Rhizobiales;f__Hyphomicrobiaceae;g__Hyphomicrobium;	8.87e-05	0.000230982	0.000136413	0	0.000305639	0.000100867	3.9e-05	0.000811597	2.86e-05	0.000154631	0.000271843	0.000198321	0.000201159	0.00025761	0.000181416	0.0004649	0.0003421	4.85e-05	0.000148976	0.0010908	7.75e-05	2.25e-05	0.000151474	9.88e-05	0.000160539	0.000111992	0.000195376	0.000201588	0.000169477	0.000351038	2.06e-05	0.000477238	0.000926569	0.000646831	0.000217936	0.000237317
k__Bacteria;p__Actinobacteria;c__Actinobacteria;o__Actinomycetales;f__Micrococcaceae;g__Rothia;	0.000177454	0.00026948	0.000136413	0.00104671	0.000305639	0.000453904	0	0	0.000285592	3.87e-05	0.00038058	0.000330535	8.05e-05	0.000858701	0.000544247	9.3e-05	0.00017105	0.00024266	9.93e-05	0.000231382	0.000193708	9.02e-05	6.06e-05	0.00014824	0.00043575	8.96e-05	0.000542711	0.000125992	8.47e-05	0.000270029	0.000164565	0.000132566	0.000138985	0.000154007	0.000108968	0.00018458
k__Bacteria;p__Proteobacteria;c__Alphaproteobacteria;o__Rhodobacterales;f__Rhodobacteraceae;g__Rhodovulum;	0	0	0.00104584	0	0	0	3.9e-05	0	0	3.87e-05	0	2.2e-05	0	0	0	0	0	0	0	0	0	0	0	2.47e-05	0	0	0	0	2.12e-05	2.7e-05	0	0	0	0	0	0
k__Bacteria;p__Bacteroidetes;c__Sphingobacteriia;o__Sphingobacteriales;f__Flammeovirgaceae;g__A4;	0.000133091	0.000192485	9.09e-05	0.000327097	0	0.000252169	0.000429302	0.000315621	0.000142796	0.000115973	0.000163106	0.000198321	0	0.00025761	3.63e-05	9.3e-05	0.000128287	0.000194128	0.000248293	0.000958583	0.000271192	0.000157771	0.000333242	0.000370599	0.000160539	0.000201586	0.000108542	0.000151191	0.000444878	0.000270029	6.17e-05	0.000583291	0.00104239	0.000308015	0.000326904	0.000210948
k__Bacteria;p__Nitrospirae;c__Nitrospira;o__Nitrospirales;f__Thermodesulfovibrionaceae;g__GOUTA19;	0.000177454	0.000115491	4.55e-05	0	0.000967857	0.000201735	3.9e-05	2.25e-05	5.71e-05	7.73e-05	0	0.00103568	0	0.000128805	0.000181416	0.00018596	0.000256575	0	0	3.31e-05	0	0	6.06e-05	0	0.000688026	8.96e-05	2.17e-05	2.52e-05	2.12e-05	5.4e-05	4.11e-05	0	0.000231642	0	0.000108968	0
k__Bacteria;p__Cyanobacteria;c__Synechococcophycideae;o__Pseudanabaenales;f__Pseudanabaenaceae;g__Leptolyngbya;	0	0	0	0	0	0	0	0	0	0	0.000326211	0	0	4.29e-05	3.63e-05	0.00102278	0.000513149	0	0	0.000264437	3.87e-05	0	3.03e-05	2.47e-05	0	0	0	5.04e-05	4.24e-05	2.7e-05	0	0	4.63e-05	0	3.63e-05	0
k__Bacteria;p__Proteobacteria;c__Deltaproteobacteria;o__Bdellovibrionales;f__Bdellovibrionaceae;g__Bdellovibrio;	4.44e-05	0.000115491	0.000545653	0	0.00010188	0	0	0	2.86e-05	0	0.000271843	8.81e-05	0	0	7.26e-05	0.00102278	0.0003421	0	2.48e-05	0	0	9.02e-05	3.03e-05	4.94e-05	4.59e-05	0	0.000260501	2.52e-05	4.24e-05	0	2.06e-05	2.65e-05	2.32e-05	9.24e-05	3.63e-05	0.000158211
k__Bacteria;p__Proteobacteria;c__Alphaproteobacteria;o__Rhizobiales;f__Hyphomicrobiaceae;g__Parvibaculum;	0	0	0	0	0	0	0	0	0	0	5.44e-05	0	0	0	0	0.00102278	0.000128287	2.43e-05	4.97e-05	0.000330546	3.87e-05	4.51e-05	0	0	2.29e-05	0	0	0	0	0	4.11e-05	2.65e-05	4.63e-05	0	3.63e-05	2.64e-05
k__Bacteria;p__Acidobacteria;c__Acidobacteria;o__Acidobacteriales;f__Koribacteraceae;g__Candidatus Koribacter;	0.000399272	0.000307977	0	0	0.000203759	0.00100868	7.81e-05	6.76e-05	0.000171355	0.000231947	0.000108737	0.000925497	0.000160927	0.000300545	0.000253982	9.3e-05	0.000299337	2.43e-05	0.000124146	0.000396655	0	0	6.06e-05	4.94e-05	0.000389881	2.24e-05	2.17e-05	7.56e-05	0.000127108	5.4e-05	0.000287989	2.65e-05	4.63e-05	0	7.26e-05	0.00018458
k__Archaea;p__Crenarchaeota;c__Thaumarchaeota;o__Nitrososphaerales;f__Nitrososphaeraceae;g__Candidatus Nitrososphaera;	0	0.000153988	0.000500182	0.000785032	0.000356579	0.000453904	0.000702494	0.000969407	0.000599743	0	0	2.2e-05	0.00024139	4.29e-05	7.26e-05	0	8.55e-05	9.71e-05	0	0.000330546	0.000116225	0	0	7.41e-05	0.000527487	0.000268781	4.34e-05	0	6.36e-05	2.7e-05	2.06e-05	5.3e-05	0.000185314	0	3.63e-05	0.000131843
k__Bacteria;p__Proteobacteria;c__Epsilonproteobacteria;o__Campylobacterales;f__Campylobacteraceae;g__Sulfurospirillum;	4.44e-05	3.85e-05	0	0	0	0	0	0	0	0	0	0	0	0	0	0	0	2.43e-05	0	0	0	0	3.03e-05	0	0	0	0	0	0	0	2.06e-05	0	0	0.000338816	0.000326904	0.000949267
k__Bacteria;p__Actinobacteria;c__Actinobacteria;o__Actinomycetales;f__Pseudonocardiaceae;g__Pseudonocardia;	8.87e-05	0.000230982	0	6.54e-05	5.09e-05	0.000201735	0	2.25e-05	0.000171355	3.87e-05	5.44e-05	8.81e-05	0	4.29e-05	0.000145133	9.3e-05	0	9.71e-05	7.45e-05	0.000826364	0.000154967	9.02e-05	6.06e-05	0.000123533	0.000114671	0	0.000151959	7.56e-05	4.24e-05	0.000108012	8.23e-05	0.000106053	0.00016215	9.24e-05	0.000254259	0.000949267
k__Bacteria;p__Firmicutes;c__Clostridia;o__Clostridiales;f__Ruminococcaceae;g__Ethanoligenens;	0	0	0.000636595	0	0	0.000100867	0	4.51e-05	0.000942453	0	0	4.41e-05	0	0	0	0	4.28e-05	0	0	0	0	0	0	0	0	0	0	0	0	0	0	0	2.32e-05	0	0	0
k__Bacteria;p__Proteobacteria;c__Alphaproteobacteria;o__Sphingomonadales;f__Sphingomonadaceae;g__Sphingopyxis;	0.000177454	0.000192485	0.000181884	0	0.000254699	0.000151301	0	0	0.000399829	7.73e-05	0.000489317	8.81e-05	8.05e-05	8.59e-05	3.63e-05	0.0009298	0.0003421	0.000145596	0.000248293	0.000429709	0.00023245	0.00018031	0	0.000247066	0.000160539	0.000134391	0.000369044	0.000201588	8.47e-05	0.000108012	0.000102853	0.000530265	0.000416956	0.000338816	0.000290582	0.000237317
k__Bacteria;p__Firmicutes;c__Bacilli;o__Lactobacillales;f__Carnobacteriaceae;g__Carnobacterium;	8.87e-05	0	0	6.54e-05	0.000916917	5.04e-05	0	2.25e-05	2.86e-05	0	0	4.41e-05	0.000160927	0	0.000145133	0	4.28e-05	7.28e-05	4.97e-05	0	7.75e-05	4.51e-05	0	9.88e-05	2.29e-05	6.72e-05	6.51e-05	0	2.12e-05	2.7e-05	4.11e-05	7.95e-05	0.000115821	9.24e-05	7.26e-05	2.64e-05
k__Bacteria;p__Cyanobacteria;c__Oscillatoriophycideae;o__Chroococcales;f__Xenococcaceae;g__Chroococcidiopsis;	0	0	0	0	0	0	0	0	0	0	0	0	0	0	0	0	0	0	2.48e-05	0	0	0	0	0	0	0	0.000911755	0	2.12e-05	5.4e-05	2.06e-05	0	2.32e-05	3.08e-05	0	2.64e-05
k__Bacteria;p__Proteobacteria;c__Epsilonproteobacteria;o__Campylobacterales;f__Helicobacteraceae;g__Sulfurimonas;	4.44e-05	0.000192485	0	0	0.000203759	0.000907807	3.9e-05	0	0	7.73e-05	5.44e-05	2.2e-05	0	0	0	0.00065086	4.28e-05	0	2.48e-05	0	0	0	0	2.47e-05	0	2.24e-05	6.51e-05	0	0	5.4e-05	2.06e-05	0.000106053	0	3.08e-05	0.000145291	7.91e-05
k__Bacteria;p__Proteobacteria;c__Betaproteobacteria;o__Burkholderiales;f__Comamonadaceae;g__Schlegelella;	4.44e-05	0	0	0	0	5.04e-05	0	0	0	0	0	4.41e-05	0.000201159	8.59e-05	3.63e-05	9.3e-05	0	7.28e-05	7.45e-05	0.000165273	7.75e-05	2.25e-05	6.06e-05	9.88e-05	0.000114671	8.96e-05	4.34e-05	0.000100794	2.12e-05	0.000135015	0.000205706	0.000795397	0.000208478	0.000893242	0.000290582	0.000316422
k__Bacteria;p__Deferribacteres;c__Deferribacteres;o__Deferribacterales;f__Deferribacteraceae;g__Mucispirillum;	0	7.7e-05	0.000227355	0	0	5.04e-05	0.000234165	0	0	0	0	0	0	8.59e-05	0.000108849	9.3e-05	0	0	7.45e-05	6.61e-05	0.000348675	0	0	0.000864731	2.29e-05	4.48e-05	0	0	2.12e-05	0	0	2.65e-05	0	0	0.000108968	2.64e-05
k__Bacteria;p__Proteobacteria;c__Betaproteobacteria;o__Rhodocyclales;f__Rhodocyclaceae;g__Propionivibrio;	4.44e-05	0.000153988	0.000272826	0	0	0.000857373	3.9e-05	9.02e-05	0.000142796	7.73e-05	5.44e-05	0.00015425	0.000321854	0	0.000108849	0	0	0	0	0	0	0	0	0	0	0	0	0	0	0	0	0	0	6.16e-05	3.63e-05	5.27e-05
k__Bacteria;p__Proteobacteria;c__Gammaproteobacteria;o__Alteromonadales;f__Colwelliaceae;g__Thalassomonas;	0.000399272	7.7e-05	0	0	0.000203759	0.000151301	7.81e-05	0	0.000856776	0.000309262	0.000217474	0.000242392	0	0	3.63e-05	9.3e-05	0.00017105	4.85e-05	0	0	0	0	3.03e-05	2.47e-05	2.29e-05	0	2.17e-05	0	0	0	0	0	0	3.08e-05	0	2.64e-05
k__Bacteria;p__Actinobacteria;c__Actinobacteria;o__Actinomycetales;f__Thermomonosporaceae;g__Actinocorallia;	0	3.85e-05	4.55e-05	0	0	5.04e-05	0	0.000856686	0	0	0	4.41e-05	0	0	0	0	0	0	0	0.000165273	0	0	3.03e-05	0	0	0	2.17e-05	0	0	0	2.06e-05	2.65e-05	0	3.08e-05	0	0
k__Bacteria;p__Acidobacteria;c__Acidobacteria;o__Acidobacteriales;f__Acidobacteriaceae;g__Granulicella;	0	0	0	0	0	0	0	0	2.86e-05	0	0	0	0	0	0	0	0	0	0	0	0	0	0	0	0.000848565	0	0	0	0	0	0	0	0	0	0	2.64e-05
k__Bacteria;p__Bacteroidetes;c__Bacteroidia;o__Bacteroidales;f__Bacteroidaceae;g__5-7N15;	0	0.000384971	0	0	0	0	0	0	0	0	0	0	0	4.29e-05	0.000834513	0	0	0	0	0	0	0	0	0	0	0	2.17e-05	2.52e-05	0	0	0	5.3e-05	0	0	0	0
k__Bacteria;p__Proteobacteria;c__Alphaproteobacteria;o__Rhizobiales;f__Hyphomicrobiaceae;g__Pedomicrobium;	8.87e-05	0	0.000636595	0.000196258	0	0.000201735	0.000741521	2.25e-05	0	0	5.44e-05	0.000176285	0	0	7.26e-05	0.00037192	8.55e-05	4.85e-05	4.97e-05	0.000826364	7.75e-05	0.000112694	6.06e-05	0.00014824	0.000504552	6.72e-05	6.51e-05	7.56e-05	6.36e-05	2.7e-05	0.000123424	7.95e-05	0.000185314	3.08e-05	0.000254259	0.000158211
k__Bacteria;p__Proteobacteria;c__Deltaproteobacteria;o__Desulfuromonadales;f__Geobacteraceae;g__Geobacter;	0.000221818	0.000230982	4.55e-05	6.54e-05	0.00010188	0.000252169	3.9e-05	0	0	7.73e-05	0.000108737	0.000815319	4.02e-05	4.29e-05	3.63e-05	0.00037192	0.000384862	2.43e-05	0.000124146	0.000396655	3.87e-05	9.02e-05	3.03e-05	0.00014824	0.000252276	0	4.34e-05	2.52e-05	4.24e-05	0.000162018	0.000143994	0.000503752	0.000579106	0	0.000290582	2.64e-05
k__Bacteria;p__Bacteroidetes;c__Bacteroidia;o__Bacteroidales;f__[Odoribacteraceae];g__Butyricimonas;	0	0	0	0	0	0.00080694	0	0	0	0	0	0	0	0.000128805	0	0	0	9.71e-05	0.000148976	0.000264437	0.00023245	0.000112694	0.000181769	0.000172946	0.000114671	0.000403172	0.000325627	0.00032758	0.000127108	0.000135015	0	5.3e-05	0.00016215	0.000154007	0.000145291	0.000210948
k__Bacteria;p__Verrucomicrobia;c__Verrucomicrobiae;o__Verrucomicrobiales;f__Verrucomicrobiaceae;g__Persicirhabdus;	0.000665454	0.000115491	4.55e-05	0	0.00015282	0.000302602	0.000546384	6.76e-05	8.57e-05	7.73e-05	0.000163106	0.000572927	0.000804635	0.000128805	3.63e-05	0	8.55e-05	2.43e-05	0	0	0	0	0	2.47e-05	0.00027521	2.24e-05	2.17e-05	0	0	5.4e-05	0	0	0	0	0	0
k__Bacteria;p__Proteobacteria;c__Deltaproteobacteria;o__Myxococcales;f__Nannocystaceae;g__Nannocystis;	4.44e-05	0	0	0.000654193	0	0	0	0	0	0	5.44e-05	4.41e-05	0	0	7.26e-05	0	0	2.43e-05	0	6.61e-05	7.75e-05	0	0	2.47e-05	0	0	0	2.52e-05	8.47e-05	0	0	0.000106053	9.27e-05	0.000800838	0.000254259	0.000158211
k__Bacteria;p__Proteobacteria;c__Alphaproteobacteria;o__Kiloniellales;f__Kiloniellaceae;g__Thalassospira;	8.87e-05	7.7e-05	0	6.54e-05	0.00010188	0	0.000117082	0.000653786	0.000799657	7.73e-05	0.000108737	6.61e-05	0.000643708	0.00042935	0.000435398	9.3e-05	8.55e-05	0	0	0.000132218	3.87e-05	0	0	2.47e-05	0	4.48e-05	4.34e-05	2.52e-05	0	0	0	0	0	0	0.000108968	0
k__Bacteria;p__Nitrospirae;c__Nitrospira;o__Nitrospirales;f__Thermodesulfovibrionaceae;g__LCP-6;	0.000177454	7.7e-05	0.000181884	0	5.09e-05	0	3.9e-05	2.25e-05	0	3.87e-05	0	0.000286463	0	0.00017174	0.000145133	9.3e-05	4.28e-05	0	0	0	0	0	0	2.47e-05	0.000298145	2.24e-05	2.17e-05	0	0	8.1e-05	2.06e-05	0.000795397	0.000694927	0	0	0
k__Bacteria;p__Proteobacteria;c__Gammaproteobacteria;o__Xanthomonadales;f__Xanthomonadaceae;g__Luteimonas;	0	0.000192485	9.09e-05	0.000785032	5.09e-05	0	3.9e-05	0	0.000228474	0.000115973	0	0	0.000160927	8.59e-05	0.000326548	0	4.28e-05	0	2.48e-05	0.000561928	3.87e-05	2.25e-05	9.09e-05	4.94e-05	0.000137605	8.96e-05	2.17e-05	0.000100794	4.24e-05	0.000270029	0	2.65e-05	0.00016215	9.24e-05	7.26e-05	2.64e-05
k__Bacteria;p__Actinobacteria;c__Actinobacteria;o__Actinomycetales;f__Actinomycetaceae;g__Actinomyces;	0.000133091	0.000153988	0.000136413	0.000785032	5.09e-05	5.04e-05	0	2.25e-05	0	0	0.000326211	2.2e-05	0	0.000386415	0.000108849	9.3e-05	0	9.71e-05	0.000148976	0.000165273	0.000309933	6.76e-05	6.06e-05	0.00014824	6.88e-05	0.000201586	0.000195376	5.04e-05	6.36e-05	0.000216024	0.000123424	7.95e-05	2.32e-05	0.000154007	3.63e-05	0.000263685
k__Bacteria;p__Firmicutes;c__Clostridia;o__Clostridiales;f__Peptococcaceae;g__Peptococcus;	0	7.7e-05	0	0	0	0	0	0	0	0	5.44e-05	0	0	4.29e-05	3.63e-05	0	0	0.000388255	0.000496586	0.0003636	0.000774833	0.000202849	0.000484716	0.000617665	0.000733894	0.00042557	0.000629545	0.000604763	0.000508431	0.000567062	0.000431983	0.000344672	0.000370628	0.000708433	0.00054484	0.000580108
k__Bacteria;p__Proteobacteria;c__Betaproteobacteria;o__Burkholderiales;f__Comamonadaceae;g__Limnobacter;	0	0.000769941	4.55e-05	0	5.09e-05	0.000151301	7.81e-05	2.25e-05	5.71e-05	0.000115973	0	6.61e-05	0.000321854	0	0.000471681	9.3e-05	8.55e-05	0	0	0.000297491	3.87e-05	0	0	7.41e-05	0	0	2.17e-05	0	0	5.4e-05	0.000719972	2.65e-05	0	6.16e-05	0.000108968	7.91e-05
k__Bacteria;p__Proteobacteria;c__Gammaproteobacteria;o__Legionellales;f__Coxiellaceae;g__Aquicella;	4.44e-05	0	4.55e-05	0	0	5.04e-05	0.000390274	0	2.86e-05	0	0.000217474	4.41e-05	0	0	7.26e-05	0.00074384	0.000256575	0	0	0	0	0	0	0	0	0	0	0	2.12e-05	5.4e-05	0	2.65e-05	4.63e-05	0	3.63e-05	5.27e-05
k__Bacteria;p__Chloroflexi;c__Anaerolineae;o__Anaerolineales;f__Anaerolinaceae;g__SHD-231;	0	0	0	0	0	0	0.000195137	0	0	0	0	0	0	0	0	9.3e-05	0	0	0	3.31e-05	0	2.25e-05	0	0	0	0	0	5.04e-05	2.12e-05	0	2.06e-05	0.000742371	0.000324299	0	0	0.000105474
k__Bacteria;p__Proteobacteria;c__Gammaproteobacteria;o__Alteromonadales;f__OM60;g__Congregibacter;	4.44e-05	0	0	0	0	0	0	2.25e-05	0	0	0	8.81e-05	0	4.29e-05	7.26e-05	0	0	0	0	9.92e-05	7.75e-05	0.000450775	0.000181769	0	0.000137605	0.000111992	2.17e-05	5.04e-05	2.12e-05	0.000189021	6.17e-05	0.000477238	0.000741256	6.16e-05	0.000181613	2.64e-05
k__Bacteria;p__Firmicutes;c__Clostridia;o__Coriobacteriales;f__Coriobacteriaceae;g__Slackia;	0	0	0	0	0	0	0	0	0	0	0	0	0	0	7.26e-05	0	4.28e-05	0.000679447	0.000397269	0.000231382	0.000271192	9.02e-05	0.000424127	0.000296479	0.000114671	0.000403172	0.000325627	0.000604763	0.000360139	0.000540059	0.000431983	0.000238619	0.000416956	0.000462022	0.000145291	0.000738319
k__Bacteria;p__Proteobacteria;c__Deltaproteobacteria;o__Bdellovibrionales;f__Bacteriovoracaceae;g__Bacteriovorax;	0.000221818	0.000731444	0	0	0	0	0.000429302	0	0	0	0	0.000110178	0	0	7.26e-05	0	4.28e-05	0	0	0	0	0	0	0	0	0	0	0	0	0	0	0	2.32e-05	0	0	0
k__Bacteria;p__Actinobacteria;c__Actinobacteria;o__Actinomycetales;f__Microbacteriaceae;g__Agromyces;	4.44e-05	0	0	0	0	0.000151301	0	0	2.86e-05	0	5.44e-05	0	0.000120695	4.29e-05	0.000181416	0	0	4.85e-05	7.45e-05	0.000727201	7.75e-05	4.51e-05	3.03e-05	7.41e-05	4.59e-05	6.72e-05	0.000108542	0.000100794	0.000254216	8.1e-05	4.11e-05	0	9.27e-05	3.08e-05	0.000145291	0.000105474
k__Bacteria;p__Actinobacteria;c__Actinobacteria;o__Actinomycetales;f__Brevibacteriaceae;g__Brevibacterium;	4.44e-05	0	0.000272826	0	0.000203759	0	0	0.000721419	8.57e-05	7.73e-05	5.44e-05	6.61e-05	0	0.000128805	0.000108849	0	4.28e-05	0	2.48e-05	9.92e-05	3.87e-05	4.51e-05	0	7.41e-05	4.59e-05	2.24e-05	0.000173668	0.000151191	2.12e-05	8.1e-05	0	2.65e-05	4.63e-05	3.08e-05	7.26e-05	2.64e-05
k__Bacteria;p__Proteobacteria;c__Deltaproteobacteria;o__Syntrophobacterales;f__Syntrophaceae;g__Desulfomonile;	4.44e-05	0	4.55e-05	0	0	5.04e-05	7.81e-05	0	0	0	0	6.61e-05	0	0	0	0	4.28e-05	0	0	0	0	0	0	0	0	0	0	0	2.12e-05	2.7e-05	0	0.000530265	0.000718091	3.08e-05	3.63e-05	0
k__Bacteria;p__Firmicutes;c__Bacilli;o__Bacillales;f__Listeriaceae;g__Brochothrix;	4.44e-05	3.85e-05	4.55e-05	0.000130839	0.000713158	5.04e-05	3.9e-05	0	0	3.87e-05	5.44e-05	6.61e-05	0	0	0.000145133	0	0	0	0	0	0	0	0	0	0	0	0	0	0	0	0	0	0	0	0	0
k__Bacteria;p__Bacteroidetes;c__Bacteroidia;o__Bacteroidales;f__Bacteroidaceae;g__BF311;	4.44e-05	7.7e-05	0	0	0.000713158	0	0	0	0	0	0	2.2e-05	0	0.00025761	0.000435398	0	0.000128287	0	0	3.31e-05	0	0	0	2.47e-05	2.29e-05	0	2.17e-05	0	0	0	2.06e-05	5.3e-05	0	0	0	0
k__Bacteria;p__Proteobacteria;c__Gammaproteobacteria;o__Pseudomonadales;f__Moraxellaceae;g__Psychrobacter;	0.000443636	0.000384971	9.09e-05	6.54e-05	0.000254699	0.000151301	0	0.000338165	2.86e-05	0.00069584	0.000326211	6.61e-05	0.000201159	0.000472285	0.000362832	9.3e-05	0	0.000145596	0.000124146	0.000165273	0.000271192	0.000473314	0.000242358	0.000197653	0.000688026	0.000694351	0.000347335	7.56e-05	0.000190662	0.000486053	0.000143994	0.000185593	0.000277971	0.000246412	0.000181613	0.000369159
k__Bacteria;p__Spirochaetes;c__Spirochaetes;o__Spirochaetales;f__Spirochaetaceae;g__Spirochaeta;	4.44e-05	3.85e-05	0.000363769	0	0	5.04e-05	0	0	0	0	0.000108737	0.000396642	0.000643708	4.29e-05	7.26e-05	0.00018596	8.55e-05	0	2.48e-05	0	0	0	0	0	0.000298145	4.48e-05	2.17e-05	0	2.12e-05	0	4.11e-05	0.000371185	0.000694927	0	0	0
k__Bacteria;p__Bacteroidetes;c__Bacteroidia;o__Bacteroidales;f__Porphyromonadaceae;g__Paludibacter;	4.44e-05	0.000115491	0	0	0	0	0	0	0	0	5.44e-05	0.000198321	0	0.00017174	0.000217699	9.3e-05	0.000684199	2.43e-05	2.48e-05	0	3.87e-05	0	3.03e-05	4.94e-05	2.29e-05	4.48e-05	2.17e-05	0	4.24e-05	0	2.06e-05	2.65e-05	4.63e-05	0	0.000108968	7.91e-05
k__Bacteria;p__Firmicutes;c__Bacilli;o__Bacillales;f__Alicyclobacillaceae;g__Alicyclobacillus;	0.000133091	0.000115491	0.000682066	0	0	0	0.000312219	2.25e-05	0.000171355	3.87e-05	5.44e-05	4.41e-05	0	8.59e-05	0.000145133	0	0	0	2.48e-05	0.000198327	7.75e-05	0	3.03e-05	2.47e-05	0.000160539	4.48e-05	0	5.04e-05	8.47e-05	2.7e-05	0	0	4.63e-05	0	0	2.64e-05
k__Bacteria;p__Firmicutes;c__Clostridia;o__Clostridiales;f__Symbiobacteriaceae;g__Symbiobacterium;	8.87e-05	0.000115491	0.000682066	0	0	0.000151301	3.9e-05	0	2.86e-05	0	0	4.41e-05	0	0.00034348	0.000290265	0	4.28e-05	0	2.48e-05	0	0	0	3.03e-05	0	0	2.24e-05	0	0	0	2.7e-05	0	0	4.63e-05	0	0	0
k__Bacteria;p__Firmicutes;c__Bacilli;o__Thermicanales;f__Thermicanaceae;g__Thermicanus;	4.44e-05	0	0	0	0	0	0	0	0	0	0	0	0	0	0	0	0	0.000145596	0.000173805	0.000165273	0.000193708	0.000247926	0.000151474	0.00014824	4.59e-05	4.48e-05	4.34e-05	5.04e-05	0.000105923	5.4e-05	0.000678831	0.000159079	0.00016215	9.24e-05	0.000108968	0.000105474
k__Bacteria;p__Bacteroidetes;c__Sphingobacteriia;o__Sphingobacteriales;f__Ekhidnaceae;g__NAC60-3;	8.87e-05	3.85e-05	0	0	0	5.04e-05	0.000663466	0	0	3.87e-05	0	0.00015425	0	0	0	0	4.28e-05	0	0	0	0	0	0	0	0	0	0	0	0	0	2.06e-05	0	0	0	0	0
k__Bacteria;p__Actinobacteria;c__Actinobacteria;o__Actinomycetales;f__Nocardioidaceae;g__Aeromicrobium;	0.000221818	3.85e-05	0	6.54e-05	0	5.04e-05	3.9e-05	0.000653786	0.00034271	3.87e-05	0	8.81e-05	0	4.29e-05	0.000108849	9.3e-05	0	2.43e-05	2.48e-05	0.000661091	3.87e-05	2.25e-05	6.06e-05	4.94e-05	0.000114671	0.000156789	2.17e-05	5.04e-05	0.000211846	5.4e-05	0.000123424	5.3e-05	6.95e-05	0	0.000181613	7.91e-05
k__Bacteria;p__Verrucomicrobia;c__Opitutae;o__Opitutales;f__Opitutaceae;g__Opitutus;	0.000221818	0.000230982	0	0	0.00015282	5.04e-05	0	4.51e-05	2.86e-05	0.000115973	0	0.000308499	0.000643708	4.29e-05	7.26e-05	9.3e-05	8.55e-05	4.85e-05	0	0.000231382	0	0	6.06e-05	4.94e-05	0.000183474	2.24e-05	2.17e-05	5.04e-05	2.12e-05	0.000189021	6.17e-05	0.000159079	0.000115821	0.000154007	3.63e-05	2.64e-05
k__Bacteria;p__Firmicutes;c__Bacilli;o__Bacillales;f__Sporolactobacillaceae;g__Sporolactobacillus;	0	0	0	0	0	0	0	0	0	0	0	0	0	0	0	0	0	2.43e-05	2.48e-05	0	7.75e-05	2.25e-05	9.09e-05	9.88e-05	0.000642158	4.48e-05	0	0	2.12e-05	5.4e-05	8.23e-05	7.95e-05	4.63e-05	6.16e-05	0.000145291	0.000105474
k__Bacteria;p__Bacteroidetes;c__Sphingobacteriia;o__Sphingobacteriales;f__Flexibacteraceae;g__Pontibacter;	0	0	0.000545653	6.54e-05	0	0.000100867	0	0	0.000257033	0.000154631	0	2.2e-05	8.05e-05	0	0	0	0	2.43e-05	7.45e-05	0.000628037	7.75e-05	0.000135233	0.000242358	9.88e-05	0.000252276	8.96e-05	6.51e-05	0.000100794	6.36e-05	8.1e-05	0.000205706	0	6.95e-05	0.000123206	0.000217936	7.91e-05
k__Bacteria;p__Firmicutes;c__Bacilli;o__Lactobacillales;f__Aerococcaceae;g__Facklamia;	4.44e-05	7.7e-05	0	0	0.000203759	5.04e-05	0	2.25e-05	0	0	0	2.2e-05	0	8.59e-05	0.000181416	0	8.55e-05	7.28e-05	0.000422098	9.92e-05	0.000619867	0.000112694	9.09e-05	0.00014824	0	0.000201586	0.000217085	0.000125992	8.47e-05	0	4.11e-05	0	2.32e-05	0	0	5.27e-05
k__Bacteria;p__Firmicutes;c__Erysipelotrichi;o__Erysipelotrichales;f__Erysipelotrichaceae;g__[Eubacterium];	0	0	0	0	0	0	0	0	0	3.87e-05	0.000217474	0.000132214	0	0	3.63e-05	0	0.000299337	0.000363989	0.000223464	0.000198327	0.000581125	0.000247926	0.000424127	0.000420012	0.000183474	0.000582359	0.00028221	0.000302381	0.000466062	0.000324035	0.000617119	0.000318159	0.000416956	0.00043122	0.000254259	0.000290054
k__Archaea;p__Euryarchaeota;c__Methanobacteria;o__Methanobacteriales;f__Methanobacteriaceae;g__Methanobrevibacter;	0	0	0	0	0	0.000605205	0	0	0.000171355	0	0	0	4.02e-05	0	3.63e-05	0	0	0	0	0	0	0	0	2.47e-05	4.59e-05	8.96e-05	6.51e-05	7.56e-05	2.12e-05	2.7e-05	4.11e-05	7.95e-05	6.95e-05	3.08e-05	0	0.000210948
k__Bacteria;p__Firmicutes;c__Bacilli;o__Lactobacillales;f__Enterococcaceae;g__Enterococcus;	0.000133091	0.000115491	4.55e-05	0	0	0	0	0	0	0	0	2.2e-05	0.000160927	0.000601091	0.000145133	0	0	0	2.48e-05	0	3.87e-05	2.25e-05	0	2.47e-05	0	0	0	0	0	0	0	5.3e-05	0	3.08e-05	7.26e-05	5.27e-05
k__Bacteria;p__Proteobacteria;c__Gammaproteobacteria;o__Xanthomonadales;f__Xanthomonadaceae;g__Rhodanobacter;	0.000532363	0.000192485	0.000363769	6.54e-05	5.09e-05	0.000554771	7.81e-05	2.25e-05	0.000599743	0.000193289	5.44e-05	0.000176285	4.02e-05	0.00042935	0.000181416	0.00018596	4.28e-05	9.71e-05	0.000198634	0.000165273	0.000271192	0.000135233	6.06e-05	7.41e-05	0.000160539	0.000134391	4.34e-05	0.000201588	0.000381324	0.000108012	4.11e-05	7.95e-05	0.00016215	3.08e-05	7.26e-05	0.00018458
k__Bacteria;p__Firmicutes;c__Erysipelotrichi;o__Erysipelotrichales;f__Erysipelotrichaceae;g__p-75-a5;	0	3.85e-05	0	0	0	5.04e-05	0	0	0.000142796	0	5.44e-05	0.000440713	0.000160927	4.29e-05	0.000108849	0.0004649	0.000598674	0	2.48e-05	0	3.87e-05	2.25e-05	6.06e-05	7.41e-05	0	4.48e-05	0	0	4.24e-05	2.7e-05	4.11e-05	0	0	3.08e-05	3.63e-05	0
k__Bacteria;p__Cyanobacteria;c__Oscillatoriophycideae;o__Oscillatoriales;f__Phormidiaceae;g__Phormidium;	0	0	0	0	0	0	0	0	0	0	0	0	0	0	0	0	0	7.28e-05	0	0.000594982	0	2.25e-05	3.03e-05	7.41e-05	0	4.48e-05	4.34e-05	0.000302381	8.47e-05	0.000162018	2.06e-05	5.3e-05	0	0	0.000363227	2.64e-05
k__Bacteria;p__Cyanobacteria;c__Nostocophycideae;o__Nostocales;f__Nostocaceae;g__Cylindrospermopsis;	0	0	0	0	0	0	0	0	0	0	0	0	0	0	0	0	0	0	0	0	0	0	0	0	0	0	0	0	0	0.000594065	0.000246848	0.000291646	9.27e-05	0	0	0
k__Bacteria;p__Firmicutes;c__Clostridia;o__Clostridiales;f__Peptococcaceae;g__rc4-4;	0.000133091	3.85e-05	0.000227355	0	0	0	0	0	0	0	0	2.2e-05	4.02e-05	0.000128805	0.000253982	0	0.000213812	4.85e-05	2.48e-05	9.92e-05	0.000116225	0	3.03e-05	0.000420012	9.17e-05	0.000582359	6.51e-05	0	0	2.7e-05	2.06e-05	0	0	0	0	2.64e-05
k__Bacteria;p__Firmicutes;c__Clostridia;o__Clostridiales;f__Lachnospiraceae;g__Anaerostipes;	0	0.000192485	0.000272826	0	0	5.04e-05	0.000273192	0	5.71e-05	0.000154631	5.44e-05	0.000242392	0	0.000386415	0.00058053	9.3e-05	8.55e-05	0.000315457	0.000322781	9.92e-05	0.00023245	0.000135233	0.000151474	0.000420012	0.000252276	0.000179187	0.000325627	0.000151191	0.000190662	8.1e-05	0.000143994	0.000291646	9.27e-05	0.000184809	3.63e-05	0.000210948
k__Bacteria;p__Firmicutes;c__Bacilli;o__Bacillales;f__Staphylococcaceae;g__Salinicoccus;	8.87e-05	0.000577456	9.09e-05	0	0.000458459	0	0	2.25e-05	8.57e-05	3.87e-05	0.00038058	6.61e-05	8.05e-05	0.00025761	0.000471681	0.00018596	0.000213812	0	4.97e-05	0	0	0.000135233	3.03e-05	0	4.59e-05	4.48e-05	4.34e-05	2.52e-05	0.000105923	0	0	2.65e-05	0	0	3.63e-05	0
k__Bacteria;p__Bacteroidetes;c__Bacteroidia;o__Bacteroidales;f__[Odoribacteraceae];g__Odoribacter;	0	0	0	0	0	5.04e-05	0	0	0	0	0	0	0	8.59e-05	3.63e-05	0	0	0.00012133	0.000322781	0.000165273	0.000542383	0.000112694	0.000575601	0.000247066	0.000183474	0.000223984	8.68e-05	0.00032758	0.000127108	0.000108012	8.23e-05	0.000132566	0.000185314	3.08e-05	3.63e-05	2.64e-05
k__Bacteria;p__Firmicutes;c__Clostridia;o__Coriobacteriales;f__Coriobacteriaceae;g__Atopobium;	0	0.000153988	0	0	0	0	3.9e-05	0	5.71e-05	3.87e-05	0	8.81e-05	0	4.29e-05	0.000290265	0.00018596	0.000555912	0	7.45e-05	6.61e-05	3.87e-05	0	3.03e-05	2.47e-05	0.000114671	0.000134391	0.000108542	0.000100794	8.47e-05	5.4e-05	6.17e-05	5.3e-05	9.27e-05	9.24e-05	0	0.000210948
k__Bacteria;p__Proteobacteria;c__Alphaproteobacteria;o__Rhizobiales;f__Rhodobiaceae;g__Afifella;	0	0	0	0	5.09e-05	5.04e-05	0	0	0	0	0	0	0	0	3.63e-05	9.3e-05	0	9.71e-05	4.97e-05	0.000330546	7.75e-05	2.25e-05	0	0	0.000550421	6.72e-05	6.51e-05	5.04e-05	6.36e-05	0	0	2.65e-05	0	9.24e-05	7.26e-05	5.27e-05
k__Bacteria;p__Verrucomicrobia;c__[Spartobacteria];o__[Chthoniobacterales];f__[Chthoniobacteraceae];g__Chthoniobacter;	0	0	4.55e-05	0	0	0	0.000546384	0	2.86e-05	0	0	0	0	0	0	9.3e-05	0	2.43e-05	4.97e-05	6.61e-05	0	0	0	0	0.000206408	0	2.17e-05	0	4.24e-05	2.7e-05	2.06e-05	5.3e-05	9.27e-05	0.000123206	0	7.91e-05
k__Bacteria;p__Firmicutes;c__Bacilli;o__Bacillales;f__Paenibacillaceae;g__Cohnella;	0	0	0.000545653	0	0	0	0	0	0	0	5.44e-05	0	0	0	0	0	0	0	0	3.31e-05	0	0	0	2.47e-05	2.29e-05	0	0	0	4.24e-05	2.7e-05	0	2.65e-05	2.32e-05	3.08e-05	0	0
k__Bacteria;p__Proteobacteria;c__Deltaproteobacteria;o__Desulfobacterales;f__Desulfobulbaceae;g__Desulfobulbus;	0	0	0.000272826	0	0	0	3.9e-05	0	0.000542625	0	0	4.41e-05	0	4.29e-05	0	0.00027894	0.000128287	0	0	3.31e-05	3.87e-05	0	0	0	0	2.24e-05	2.17e-05	2.52e-05	4.24e-05	2.7e-05	6.17e-05	0.000132566	0.00016215	6.16e-05	7.26e-05	0.000131843
k__Bacteria;p__Firmicutes;c__Clostridia;o__Clostridiales;f__Dehalobacteriaceae;g__Dehalobacterium;	4.44e-05	0.000230982	0.000318298	0	0	0	0.000234165	0	0	0	5.44e-05	2.2e-05	0	8.59e-05	0.000399115	0	8.55e-05	4.85e-05	4.97e-05	3.31e-05	0.000542383	4.51e-05	0.000181769	2.47e-05	2.29e-05	4.48e-05	0.000108542	0.000151191	2.12e-05	0	0	2.65e-05	0	3.08e-05	3.63e-05	2.64e-05
k__Bacteria;p__Proteobacteria;c__Gammaproteobacteria;o__Alteromonadales;f__Alteromonadaceae;g__HTCC2207;	0.000532363	0.000115491	9.09e-05	6.54e-05	0	5.04e-05	7.81e-05	0.000270532	0.000114237	0.000231947	0.000108737	0.00035257	0	0.00042935	7.26e-05	0	4.28e-05	0	0	0	0	0	0	0	2.29e-05	0	0	0	0	0	0	0	0	0	0	0
k__Bacteria;p__Armatimonadetes;c__Chthonomonadetes;o__Chthonomonadales;f__Chthonomonadaceae;g__Chthonomonas;	4.44e-05	3.85e-05	4.55e-05	0	0	0	7.81e-05	0	2.86e-05	0	0	0.000242392	0	0	0	9.3e-05	0	7.28e-05	0	9.92e-05	0	0	0	0	0.000527487	0	2.17e-05	2.52e-05	0	0	0	5.3e-05	2.32e-05	0	3.63e-05	0
k__Bacteria;p__Proteobacteria;c__Alphaproteobacteria;o__Rhodospirillales;f__Rhodospirillaceae;g__Inquilinus;	8.87e-05	3.85e-05	0	0.000523355	0	0	0.000195137	2.25e-05	0	3.87e-05	5.44e-05	2.2e-05	0	0	0	0	0	0	0	6.61e-05	3.87e-05	0	0	4.94e-05	0	0	0	5.04e-05	0	0	0	0	0	0	0	0
k__Bacteria;p__Proteobacteria;c__Gammaproteobacteria;o__Thiotrichales;f__Thiotrichaceae;g__Leucothrix;	4.44e-05	7.7e-05	4.55e-05	0.000523355	0	0	3.9e-05	0	5.71e-05	7.73e-05	5.44e-05	4.41e-05	0	0	0	0	0	0	0	0	0	0	0	0	0	0	0	0	0	0	0	0	0	0	0	0
k__Bacteria;p__Proteobacteria;c__Alphaproteobacteria;o__Rhodobacterales;f__Rhodobacteraceae;g__Amaricoccus;	0	3.85e-05	0	0	0	0	0	0.00051852	0	0	5.44e-05	2.2e-05	0	0	0	0	0	0	0	6.61e-05	0	2.25e-05	0	0	0	0	0	0	0	0	0	0	4.63e-05	3.08e-05	3.63e-05	0
k__Bacteria;p__Verrucomicrobia;c__Verrucomicrobiae;o__Verrucomicrobiales;f__Verrucomicrobiaceae;g__Prosthecobacter;	4.44e-05	0	0	0	0	0.000252169	3.9e-05	0	0	3.87e-05	0	8.81e-05	0	0.00025761	7.26e-05	9.3e-05	0	0	0	0	0	0	0	0	0	0	2.17e-05	0	2.12e-05	0.000513056	0.000185136	0	4.63e-05	0.000184809	3.63e-05	0.000263685
k__Bacteria;p__Armatimonadetes;c__Armatimonadia;o__Armatimonadales;f__Armatimonadaceae;g__CL0-1;	0	0	4.55e-05	0	0	0	0	0	0	0	0	2.2e-05	0.000201159	0	0	0	0	0	0	3.31e-05	0	0	0	0	0	0	0	0	0	0.000513056	0.00032913	5.3e-05	2.32e-05	0	0	0
k__Bacteria;p__Proteobacteria;c__Gammaproteobacteria;o__Pasteurellales;f__Pasteurellaceae;g__Aggregatibacter;	0.000266182	0.000153988	0	0.000196258	0.00010188	0	0	9.02e-05	0	0.000115973	0	8.81e-05	4.02e-05	0.000214675	0.000507964	0	0	7.28e-05	0	3.31e-05	0	0	0	2.47e-05	0	2.24e-05	0	0	0	0	0	0.000132566	2.32e-05	3.08e-05	0.000145291	7.91e-05
k__Bacteria;p__Proteobacteria;c__Gammaproteobacteria;o__Xanthomonadales;f__Xanthomonadaceae;g__Luteibacter;	8.87e-05	0.000230982	0.000136413	0.000130839	0.000305639	0.000504337	7.81e-05	0.000135266	0.000257033	7.73e-05	5.44e-05	0.000308499	0.000482781	0	0.000108849	0	4.28e-05	2.43e-05	0	3.31e-05	0	0	0	4.94e-05	0	2.24e-05	0	0	0	0	0	0	2.32e-05	3.08e-05	3.63e-05	5.27e-05
k__Bacteria;p__Firmicutes;c__Clostridia;o__Clostridiales;f__Veillonellaceae;g__Mitsuokella;	4.44e-05	0	0.000181884	0	0	0	0	0	0.000199914	3.87e-05	5.44e-05	2.2e-05	0	0	0	0	0	0.000218394	0.00034761	0.000264437	0.000503642	0.000157771	0.000363537	0.000345893	0.000229342	0.00042557	0.000477586	0.000201588	0.000444878	0.000486053	0.000246848	0.000318159	0.000347464	0.00021561	0.000290582	0.000263685
k__Bacteria;p__Nitrospirae;c__Nitrospira;o__Nitrospirales;f__FW;g__4-29;	8.87e-05	0.000192485	4.55e-05	0	0	0	0.000195137	0	2.86e-05	0.000115973	0	0.000484784	0	0.000214675	0.000362832	0	8.55e-05	0	0	0	0	0	3.03e-05	0	0	2.24e-05	2.17e-05	0	2.12e-05	0	0	2.65e-05	0.000231642	3.08e-05	0	0
k__Bacteria;p__Firmicutes;c__Clostridia;o__Clostridiales;f__Clostridiaceae;g__Finegoldia;	8.87e-05	0.000307977	0	0	0	0	3.9e-05	0	2.86e-05	3.87e-05	0	6.61e-05	0	0.00034348	0.000471681	0	0	4.85e-05	4.97e-05	0	7.75e-05	0	0	2.47e-05	0	0	8.68e-05	2.52e-05	0	2.7e-05	0	0	0	0	0	0
k__Bacteria;p__Firmicutes;c__Bacilli;o__Bacillales;f__Paenibacillaceae;g__Thermobacillus;	4.44e-05	3.85e-05	0.000363769	0	0	0	0.000468329	0	0	3.87e-05	5.44e-05	2.2e-05	0	0	0	0	0	0	0	6.61e-05	3.87e-05	0	6.06e-05	0	0	0	2.17e-05	0	0	0	2.06e-05	2.65e-05	4.63e-05	0	0	0
k__Bacteria;p__Firmicutes;c__Clostridia;o__Clostridiales;f__Lachnospiraceae;g__Butyrivibrio;	0	0	0	0	0	0	0.000468329	0	0	0	5.44e-05	2.2e-05	0.000201159	0	0	9.3e-05	0	0	0.000124146	0.000132218	0.000116225	0	6.06e-05	4.94e-05	2.29e-05	8.96e-05	2.17e-05	0.000100794	0	0	0	0	2.32e-05	0	0.000145291	0
k__Bacteria;p__Proteobacteria;c__Betaproteobacteria;o__Rhodocyclales;f__Rhodocyclaceae;g__Uliginosibacterium;	0	0	0.000227355	0	0	0.00040347	0	0	2.86e-05	0	5.44e-05	0	0	0	3.63e-05	0.0004649	4.28e-05	0	0	0	0	0	0	0	2.29e-05	0	0	0	2.12e-05	0	0	0	0	3.08e-05	0	2.64e-05
k__Bacteria;p__Chloroflexi;c__Chloroflexi;o__Chloroflexales;f__Oscillochloridaceae;g__Oscillochloris;	0	0	0	0	0	0	0	0	0	0	0	2.2e-05	0	0	0	0.0004649	4.28e-05	0	0	0	0	0	0	0	0	0	0	0	0	0	0	0	0	0	0	0
k__Bacteria;p__Bacteroidetes;c__Flavobacteriia;o__Flavobacteriales;f__Flavobacteriaceae;g__Gillisia;	0	0	0	0	0	5.04e-05	3.9e-05	0	0	3.87e-05	0	0	0.000201159	0	0	0	0	0	7.45e-05	0.000462764	0	0.00018031	3.03e-05	7.41e-05	0	6.72e-05	4.34e-05	5.04e-05	4.24e-05	8.1e-05	2.06e-05	2.65e-05	0	6.16e-05	3.63e-05	0.000210948
k__Bacteria;p__Proteobacteria;c__Gammaproteobacteria;o__Oceanospirillales;f__Oceanospirillaceae;g__Oceanospirillum;	0	0.000461965	4.55e-05	0	0	0	0	0	0	7.73e-05	0.000108737	2.2e-05	0	0	0.000435398	0	0	0	0	3.31e-05	0	2.25e-05	0	0	0	0	0	0	0	2.7e-05	0	0	0	0	0	0
k__Bacteria;p__Proteobacteria;c__Gammaproteobacteria;o__Enterobacteriales;f__Enterobacteriaceae;g__Buchnera;	0.000266182	3.85e-05	0	6.54e-05	0	0.000100867	0	0	8.57e-05	0	0.000271843	6.61e-05	0.000120695	0.000300545	3.63e-05	0	0.00017105	4.85e-05	0.000124146	0.000198327	7.75e-05	0.000112694	0.000272653	0.000197653	0.000458684	6.72e-05	4.34e-05	0.000100794	2.12e-05	5.4e-05	6.17e-05	2.65e-05	0.000138985	6.16e-05	7.26e-05	0.000105474
k__Bacteria;p__Actinobacteria;c__Actinobacteria;o__Actinomycetales;f__Dietziaceae;g__Dietzia;	0.000221818	0.000115491	9.09e-05	0	0.000458459	0.000252169	3.9e-05	0.000180355	5.71e-05	0.000115973	0.00038058	4.41e-05	8.05e-05	0.00034348	0.000362832	0.00027894	4.28e-05	2.43e-05	0	9.92e-05	7.75e-05	4.51e-05	3.03e-05	2.47e-05	2.29e-05	0.000246383	6.51e-05	7.56e-05	0	8.1e-05	0	2.65e-05	0	3.08e-05	3.63e-05	0.000263685
k__Bacteria;p__Proteobacteria;c__Alphaproteobacteria;o__Rhizobiales;f__Xanthobacteraceae;g__Xanthobacter;	4.44e-05	7.7e-05	0.000181884	0.000457935	0.000305639	0.000302602	7.81e-05	0.000135266	0.000228474	0.000270605	0.000108737	4.41e-05	0	0.00017174	7.26e-05	0	4.28e-05	2.43e-05	0	0	0	0	0	2.47e-05	0	0	0	0	2.12e-05	0	0	5.3e-05	0	0	0	2.64e-05
k__Bacteria;p__Bacteroidetes;c__Flavobacteriia;o__Flavobacteriales;f__Flavobacteriaceae;g__Tenacibaculum;	0	0.000346474	0	0.000457935	0	0	7.81e-05	0	2.86e-05	0.000270605	0	6.61e-05	0	0	0.000181416	0	0	0	2.48e-05	0	3.87e-05	2.25e-05	3.03e-05	2.47e-05	0	0	2.17e-05	2.52e-05	2.12e-05	0	4.11e-05	0	0	0	0	0
k__Bacteria;p__Proteobacteria;c__Gammaproteobacteria;o__Aeromonadales;f__Succinivibrionaceae;g__Ruminobacter;	0	0	0	0.000457935	0	0	0	0	0	0	5.44e-05	2.2e-05	0	0	0	0	0	0	0	0	0	0	0	0	0	0	0	0	0	0	0	0	0	0	0	0
k__Bacteria;p__Bacteroidetes;c__Sphingobacteriia;o__Sphingobacteriales;f__Flexibacteraceae;g__Hymenobacter;	0.000133091	0	0.000181884	0	0	0	0	2.25e-05	0	0	0	0	0	4.29e-05	0.000108849	0	0	0	2.48e-05	3.31e-05	0	4.51e-05	0	9.88e-05	0	4.48e-05	0.000455878	2.52e-05	4.24e-05	2.7e-05	2.06e-05	0	4.63e-05	0	0	0
k__Bacteria;p__Actinobacteria;c__Actinobacteria;o__Actinomycetales;f__Microbacteriaceae;g__Leucobacter;	0	3.85e-05	0	0	0	0.000453904	0	2.25e-05	0.000199914	0	0	6.61e-05	0	0	3.63e-05	0	0	0	0	6.61e-05	7.75e-05	0	0	7.41e-05	9.17e-05	8.96e-05	2.17e-05	0	4.24e-05	0	6.17e-05	0	0	0	0.000108968	0.000131843
k__Bacteria;p__Proteobacteria;c__Alphaproteobacteria;o__Rhodospirillales;f__Acetobacteraceae;g__Acetobacter;	0	0.000153988	0	0	5.09e-05	5.04e-05	3.9e-05	2.25e-05	0	0.000115973	5.44e-05	8.81e-05	0	0.00025761	3.63e-05	0	0.000128287	0.000315457	0.000273122	0.000165273	0.000193708	2.25e-05	0.000272653	0.000197653	0.000366947	0.000313578	0.000412461	0.000201588	0.000444878	0.000243026	0.000431983	7.95e-05	0.000231642	0.000184809	0.00039955	0.000263685
k__Bacteria;p__Chloroflexi;c__Anaerolineae;o__Caldilineales;f__Caldilineaceae;g__Caldilinea;	0	3.85e-05	0.00040924	0	0	5.04e-05	3.9e-05	0	0	3.87e-05	0.000108737	0.000110178	0	0	0	0.00027894	4.28e-05	0	0	3.31e-05	0	0	0	0	0	0	0	0	2.12e-05	0.000108012	0.000102853	0.000238619	0.00044012	0.000123206	7.26e-05	0
k__Bacteria;p__Actinobacteria;c__Actinobacteria;o__Actinomycetales;f__Actinomycetaceae;g__Parascardovia;	8.87e-05	3.85e-05	0	0	0.00010188	0	3.9e-05	2.25e-05	0	0	0.000108737	8.81e-05	8.05e-05	0.000386415	0.000435398	0.00018596	0.000299337	9.71e-05	9.93e-05	0.0003636	3.87e-05	4.51e-05	3.03e-05	9.88e-05	0.000137605	4.48e-05	4.34e-05	0	6.36e-05	2.7e-05	6.17e-05	0.000132566	9.27e-05	6.16e-05	0.000145291	5.27e-05
k__Bacteria;p__Proteobacteria;c__Alphaproteobacteria;o__Rhizobiales;f__Rhizobiaceae;g__Agrobacterium;	8.87e-05	3.85e-05	4.55e-05	0	0.000203759	0.000302602	7.81e-05	0	2.86e-05	0.000115973	0.000163106	0	0	0.000128805	7.26e-05	0.00037192	0.000128287	4.85e-05	0	0.000429709	7.75e-05	0	3.03e-05	2.47e-05	2.29e-05	6.72e-05	0	0	6.36e-05	0.000108012	0	5.3e-05	0.000115821	3.08e-05	0.000108968	0.000105474
k__Bacteria;p__Bacteroidetes;c__Sphingobacteriia;o__Sphingobacteriales;f__Balneolaceae;g__KSA1;	0	0	0	0	0	0	0	0	0	0	0	0	0.000402317	0	0	9.3e-05	0	4.85e-05	0.000248293	0.000132218	0.000387417	0.000428237	0.000272653	0.00014824	0.000137605	0.000201586	4.34e-05	0.000176389	0.000148293	0.000162018	0.000185136	0.000106053	0.000115821	0.000277213	7.26e-05	0.00018458
k__Bacteria;p__Actinobacteria;c__Actinobacteria;o__Actinomycetales;f__Cellulomonadaceae;g__Cellulomonas;	8.87e-05	0.000153988	0.000181884	0	0	5.04e-05	0	0	0.000257033	0.000231947	0	6.61e-05	4.02e-05	8.59e-05	0.000145133	9.3e-05	4.28e-05	0	4.97e-05	6.61e-05	0	0	0	2.47e-05	0.000114671	0	6.51e-05	0	4.24e-05	0	2.06e-05	5.3e-05	2.32e-05	0	7.26e-05	0.000421896
k__Bacteria;p__Actinobacteria;c__Actinobacteria;o__Actinomycetales;f__Cellulomonadaceae;g__Demequina;	0.000133091	7.7e-05	4.55e-05	6.54e-05	0	0	0	0	0	0	0	8.81e-05	0	8.59e-05	3.63e-05	0.00018596	4.28e-05	0	2.48e-05	6.61e-05	3.87e-05	0	3.03e-05	0	4.59e-05	2.24e-05	2.17e-05	0	0	8.1e-05	0	0	0	0	0.000145291	0.000421896
k__Bacteria;p__Proteobacteria;c__Betaproteobacteria;o__Neisseriales;f__Neisseriaceae;g__Microvirgula;	4.44e-05	0	0.00040924	0	0	0	0	0	0	0	0	0	0	0	0	0	0	0	0	0	0	0	0	0	0	0	0	0	0	0	6.17e-05	0	2.32e-05	9.24e-05	3.63e-05	0.000342791
k__Bacteria;p__Firmicutes;c__Clostridia;o__Clostridiales;f__Veillonellaceae;g__Anaeromusa;	0	0	0.00040924	0	0	0	0	0	0	3.87e-05	0	2.2e-05	0	0	0	0	0	0	0	0	0	0	0	0	0	0	0	0	0	2.7e-05	0	0	0	3.08e-05	0	0.000105474
k__Bacteria;p__Proteobacteria;c__Betaproteobacteria;o__Burkholderiales;f__Comamonadaceae;g__Tepidimonas;	0.000399272	0.000307977	0.000181884	6.54e-05	0	5.04e-05	0.000117082	2.25e-05	2.86e-05	7.73e-05	5.44e-05	0.00015425	0.00024139	8.59e-05	0.000108849	9.3e-05	0	0	0	6.61e-05	0	4.51e-05	3.03e-05	2.47e-05	9.17e-05	0	8.68e-05	5.04e-05	6.36e-05	8.1e-05	0.000123424	7.95e-05	4.63e-05	6.16e-05	7.26e-05	0
k__Bacteria;p__Proteobacteria;c__Gammaproteobacteria;o__Methylococcales;f__Crenotrichaceae;g__Crenothrix;	4.44e-05	3.85e-05	0	0	0	0.000100867	0	0	0	3.87e-05	0.000108737	0.000242392	0	0	0	0.00037192	0.000256575	0	0	0	0	0	0	0	0	0	0	0	0	5.4e-05	2.06e-05	0.000291646	0.000393792	0.000154007	0.000181613	7.91e-05
k__Bacteria;p__Bacteroidetes;c__Bacteroidia;o__Bacteroidales;f__[Paraprevotellaceae];g__CF231;	4.44e-05	0	0	0.000392516	0	0	0	0	0.000285592	0	0	2.2e-05	0	0	0	0	4.28e-05	0.00012133	9.93e-05	3.31e-05	7.75e-05	0	6.06e-05	4.94e-05	4.59e-05	0.000111992	8.68e-05	0.000151191	0.000105923	2.7e-05	8.23e-05	5.3e-05	0.000138985	9.24e-05	3.63e-05	0.000131843
k__Bacteria;p__Firmicutes;c__Clostridia;o__Clostridiales;f__Clostridiaceae;g__Peptoniphilus;	4.44e-05	0.000115491	0.000136413	0	0.00015282	0	0	2.25e-05	0	3.87e-05	0	2.2e-05	0	0.000386415	0.000145133	0	0	0	2.48e-05	0	0	2.25e-05	6.06e-05	7.41e-05	0	6.72e-05	2.17e-05	2.52e-05	0.000190662	2.7e-05	4.11e-05	0	0	3.08e-05	3.63e-05	5.27e-05
k__Bacteria;p__Proteobacteria;c__Gammaproteobacteria;o__Salinisphaerales;f__Salinisphaeraceae;g__Salinisphaera;	0	0.000384971	0	0	0	0	0	0	2.86e-05	3.87e-05	0	2.2e-05	0	0	3.63e-05	0	0	0	0	0	0	0	0	0	0	4.48e-05	0	0	2.12e-05	0	0	0	2.32e-05	0	0	2.64e-05
k__Bacteria;p__Bacteroidetes;c__Sphingobacteriia;o__Sphingobacteriales;f__Saprospiraceae;g__Lewinella;	4.44e-05	0	0	0	0	0	0	0	0	3.87e-05	0	0	0	0	0	0	0	0	0	0	3.87e-05	0	0	0	0	0	2.17e-05	0	0	0.000378041	0.000164565	0	0	0	0	0
k__Bacteria;p__NC10;c__12-24;o__Methylomirabiliales;f__Methylomirabiliaceae;g__Candidatus Methylomirabilis;	0	0	0	0	0	0	0	0	0	0	5.44e-05	0	0	0	0	0.00037192	0.00017105	0	0	0	0	0	0	0	0	0	0	0	0	0	0	0	0	0	0	0
k__Bacteria;p__Actinobacteria;c__Acidimicrobiia;o__Acidimicrobiales;f__Iamiaceae;g__Iamia;	4.44e-05	0	0	0.000327097	0	0	0	0	5.71e-05	3.87e-05	5.44e-05	0	0	0.000128805	7.26e-05	0.00037192	4.28e-05	2.43e-05	0.000124146	0.000330546	7.75e-05	4.51e-05	9.09e-05	0.000123533	4.59e-05	4.48e-05	6.51e-05	5.04e-05	6.36e-05	8.1e-05	4.11e-05	7.95e-05	0	0	7.26e-05	0
k__Bacteria;p__Firmicutes;c__Clostridia;o__Clostridiales;f__Clostridiaceae;g__Fusibacter;	0	0	4.55e-05	0	0	0	0	0	0	0	0.000163106	0	0	0	0	0.00037192	4.28e-05	0	0	9.92e-05	3.87e-05	0	0	9.88e-05	2.29e-05	0	2.17e-05	0	0	0	0	0	0	0	3.63e-05	0
k__Bacteria;p__Actinobacteria;c__Actinobacteria;o__Actinomycetales;f__Thermomonosporaceae;g__Actinoallomurus;	0	0	0	0	0	0	0	0	0	0	0	0	0	0	0	0	0	0	0	0	0	0	3.03e-05	0	0.000366947	0	4.34e-05	0	0	2.7e-05	0	0	0	0	0	0
k__Bacteria;p__Proteobacteria;c__Gammaproteobacteria;o__Methylococcales;f__Methylococcaceae;g__Methylocaldum;	4.44e-05	3.85e-05	0.000363769	0	0	0.000100867	3.9e-05	0	8.57e-05	0.000193289	5.44e-05	0.00015425	0	0	3.63e-05	0.00027894	0	0	0	0	0	0	0	0	2.29e-05	0	0	0	0	8.1e-05	0	0.000132566	0	0	0	5.27e-05
k__Bacteria;p__Bacteroidetes;c__Sphingobacteriia;o__Sphingobacteriales;f__Chitinophagaceae;g__Chitinophaga;	4.44e-05	0	4.55e-05	0	0	0	0.000117082	2.25e-05	2.86e-05	0.000231947	5.44e-05	2.2e-05	0	0	3.63e-05	9.3e-05	0	0	9.93e-05	0.0003636	7.75e-05	0	6.06e-05	9.88e-05	4.59e-05	2.24e-05	2.17e-05	5.04e-05	6.36e-05	0	4.11e-05	7.95e-05	2.32e-05	6.16e-05	0	5.27e-05
k__Bacteria;p__Proteobacteria;c__Betaproteobacteria;o__Burkholderiales;f__Alcaligenaceae;g__Pigmentiphaga;	0	0.000153988	4.55e-05	0	0.00010188	0	0	0.00015781	0	0.000193289	0	4.41e-05	0.000201159	0	0.000145133	0	0	0	0	0	0	0	0	2.47e-05	0	0	2.17e-05	2.52e-05	4.24e-05	0	6.17e-05	0	0	6.16e-05	0.000363227	0
k__Bacteria;p__Proteobacteria;c__Gammaproteobacteria;o__Thiotrichales;f__Thiotrichaceae;g__Thiothrix;	0	0	0	0	0	0	0	0	0	0	0	0	0	0	0	0	0	0	0	0	0	0	0	0	0	0	0	0	0	0	0	0	0	0	0.000363227	2.64e-05
k__Bacteria;p__Proteobacteria;c__Gammaproteobacteria;o__Enterobacteriales;f__Enterobacteriaceae;g__Edwardsiella;	4.44e-05	0	0.000136413	0	0.000254699	0.000353036	0	0	0	7.73e-05	0	2.2e-05	0.00024139	4.29e-05	0.000362832	0	0	0	0	3.31e-05	0	0	0	0	0	0	0	0	0	0	2.06e-05	0	9.27e-05	3.08e-05	3.63e-05	0
k__Archaea;p__Euryarchaeota;c__Methanobacteria;o__Methanobacteriales;f__Methanobacteriaceae;g__Methanobacterium;	0	7.7e-05	0	0	0.00010188	0	0	0	2.86e-05	0	0	0	0.000321854	0.00017174	0.000362832	0	0	0	0	0	0	0	0	0	0	0	0	0	2.12e-05	0	4.11e-05	0	0	0	0	7.91e-05
k__Bacteria;p__Actinobacteria;c__Actinobacteria;o__Actinomycetales;f__Tsukamurellaceae;g__Tsukamurella;	0	3.85e-05	4.55e-05	0	0	0	0.00015611	0	0	0	0	0	0.000362086	0	3.63e-05	0	0	0	0	0	0	0	0	0	0	0	0	0	0	0	0	0	2.32e-05	0	0	0
k__Bacteria;p__Fusobacteria;c__Fusobacteria;o__Fusobacteriales;f__Fusobacteriaceae;g__Propionigenium;	0	0	0	0	0	0	0	0	2.86e-05	0	0	2.2e-05	0	0	0	0	0	0	0	0	0	2.25e-05	0	4.94e-05	9.17e-05	0.000358375	2.17e-05	0	0	8.1e-05	4.11e-05	2.65e-05	0	9.24e-05	0	7.91e-05
k__Bacteria;p__Proteobacteria;c__Gammaproteobacteria;o__Vibrionales;f__Vibrionaceae;g__Photobacterium;	0.000221818	0.000192485	4.55e-05	0.000327097	0.000203759	0.000100867	0.000117082	4.51e-05	0.00034271	0.00034792	0	0.000242392	0	0.000128805	3.63e-05	0	8.55e-05	2.43e-05	0	0	3.87e-05	4.51e-05	0	0	0	6.72e-05	2.17e-05	5.04e-05	0	0.000108012	2.06e-05	0	2.32e-05	0	0	5.27e-05
k__Bacteria;p__Proteobacteria;c__Alphaproteobacteria;o__Rhodospirillales;f__Acetobacteraceae;g__Roseococcus;	0	0.000153988	0	0	0	0	0	0	0	0	0	0	0	0	0	0	0	0	0	3.31e-05	3.87e-05	0	3.03e-05	0	0	0	0.000347335	0	0	0	4.11e-05	0	0	0	0	0
k__Bacteria;p__Bacteroidetes;c__Flavobacteriia;o__Flavobacteriales;f__Flavobacteriaceae;g__Sediminicola;	0	0.000346474	9.09e-05	0.000130839	0	0.000100867	0.000117082	0	0	0	0	2.2e-05	0	0	0.000181416	0	0	0	0	0	0	4.51e-05	0	0	0	0	0	0	0	0	0	0	0	0	3.63e-05	0
k__Bacteria;p__Actinobacteria;c__Actinobacteria;o__Actinomycetales;f__Geodermatophilaceae;g__Geodermatophilus;	4.44e-05	0	4.55e-05	0	0	0	0	0	0	0	0	0	0.000281622	0.000214675	0	0	0	2.43e-05	2.48e-05	0.000132218	0	2.25e-05	3.03e-05	2.47e-05	0.000344013	0	4.34e-05	2.52e-05	6.36e-05	0	2.06e-05	2.65e-05	0	0	0	0
k__Bacteria;p__Verrucomicrobia;c__Opitutae;o__Puniceicoccales;f__Puniceicoccaceae;g__MB11C04;	4.44e-05	0.000230982	4.55e-05	0	5.09e-05	0	3.9e-05	2.25e-05	0.00034271	0.000115973	0.000108737	0.000330535	0	0	3.63e-05	0	8.55e-05	0	0	0	0	0	0	0	0	0	0	0	0	0	0	0	0	0	0	7.91e-05
k__Bacteria;p__Proteobacteria;c__Alphaproteobacteria;o__Rhizobiales;f__Rhizobiaceae;g__Kaistia;	4.44e-05	0	4.55e-05	0	0	0	3.9e-05	0	0.00034271	7.73e-05	0	2.2e-05	0	0	0	0	0	0	0	6.61e-05	0	0	0	0	0	0	0	0	2.12e-05	2.7e-05	2.06e-05	2.65e-05	0	0	0	0
k__Bacteria;p__Firmicutes;c__Clostridia;o__Coriobacteriales;f__Coriobacteriaceae;g__Adlercreutzia;	0	0	0	0	0	0	0.000117082	0	0.000171355	0	0	6.61e-05	0	0.000214675	7.26e-05	0.00018596	4.28e-05	4.85e-05	4.97e-05	6.61e-05	0.000193708	0	3.03e-05	0.000123533	4.59e-05	0.000335976	0	0.000100794	2.12e-05	0	2.06e-05	2.65e-05	2.32e-05	0	3.63e-05	0
k__Bacteria;p__Actinobacteria;c__Actinobacteria;o__Actinomycetales;f__Nocardioidaceae;g__Kribbella;	4.44e-05	3.85e-05	0	0	0	0	0	0	0	0	5.44e-05	0	0	4.29e-05	7.26e-05	0	0	2.43e-05	4.97e-05	0.000330546	3.87e-05	6.76e-05	0	2.47e-05	6.88e-05	6.72e-05	0	0	2.12e-05	0	0	0	0	3.08e-05	7.26e-05	2.64e-05
k__Bacteria;p__Bacteroidetes;c__Sphingobacteriia;o__Sphingobacteriales;f__Flexibacteraceae;g__Emticicia;	0	0	0	0	0	0	0	0.000202899	5.71e-05	0.000115973	0	4.41e-05	0	0	0	0	4.28e-05	2.43e-05	0	0	3.87e-05	0	0	2.47e-05	0	0	0	0	0	2.7e-05	0	0	0	3.08e-05	0.000326904	2.64e-05
k__Bacteria;p__Proteobacteria;c__Gammaproteobacteria;o__Oceanospirillales;f__Oceanospirillaceae;g__Marinobacterium;	0	0	9.09e-05	0	0	0	0	0	0	3.87e-05	0	4.41e-05	0.000321854	0	0	9.3e-05	0	0	0	0	0	0	3.03e-05	0	0	0	0	0	0	0	0	0	0	0	0	0
k__Bacteria;p__Firmicutes;c__Clostridia;o__Clostridiales;f__Veillonellaceae;g__vadinHB04;	0	0	0.000318298	0	0	0	3.9e-05	0	0	0	0	2.2e-05	0	8.59e-05	0	0	0	0	0	0	0	0	0	0	0	0	0	0	0	0	0	2.65e-05	2.32e-05	0	0	5.27e-05
k__Bacteria;p__Actinobacteria;c__Actinobacteria;o__Actinomycetales;f__Intrasporangiaceae;g__Arsenicicoccus;	4.44e-05	0	0	6.54e-05	0	0	0	0.000315621	0	3.87e-05	0	4.41e-05	0	0	0	0	0	0	2.48e-05	0	0.000116225	0	0	0	0	0	0	2.52e-05	0	2.7e-05	0	2.65e-05	0	0	0	0
k__Bacteria;p__Bacteroidetes;c__Flavobacteriia;o__Flavobacteriales;f__Flavobacteriaceae;g__Wautersiella;	4.44e-05	0	0	0.000196258	5.09e-05	5.04e-05	3.9e-05	0.000315621	0	3.87e-05	0	4.41e-05	4.02e-05	0	0	0	0	0	0	0	0	2.25e-05	0	0	0	0	2.17e-05	0	0	0	0	0	2.32e-05	0	0	0
k__Bacteria;p__Verrucomicrobia;c__Opitutae;o__Puniceicoccales;f__Puniceicoccaceae;g__Coraliomargarita;	0.000310545	0.000153988	0	0	0.00015282	5.04e-05	3.9e-05	2.25e-05	0.000285592	0.000231947	0	0.000198321	0.000120695	0.000128805	3.63e-05	0	0.000213812	2.43e-05	0	0	0	2.25e-05	0	0	0	2.24e-05	0	0	0	8.1e-05	0	0	0	0	3.63e-05	0
k__Bacteria;p__Firmicutes;c__Bacilli;o__Lactobacillales;f__Aerococcaceae;g__Abiotrophia;	0	3.85e-05	0	0	0	0	0	0	0	0	0	0	0	0.000300545	0.000217699	0	0	2.43e-05	0	0	3.87e-05	0	0	0	0	0	0	0	2.12e-05	0	2.06e-05	0	0	3.08e-05	0	0
k__Bacteria;p__Fusobacteria;c__Fusobacteria;o__Fusobacteriales;f__Leptotrichiaceae;g__Leptotrichia;	0	7.7e-05	4.55e-05	0.000130839	0	0	3.9e-05	0	2.86e-05	0	0	2.2e-05	4.02e-05	0	0	0	0	0.00012133	2.48e-05	9.92e-05	0	6.76e-05	0	0.00014824	0.000298145	0.000179187	0.000238793	0.000125992	8.47e-05	0.000162018	6.17e-05	0.000159079	0.000185314	0.000184809	3.63e-05	0.000158211
k__Bacteria;p__Actinobacteria;c__Actinobacteria;o__Actinomycetales;f__Micromonosporaceae;g__Dactylosporangium;	0	0	0	0	0	0	0	0	0	0	0	0	0	0	0	0	0	0	0	0.000297491	0	0	3.03e-05	2.47e-05	2.29e-05	2.24e-05	2.17e-05	0	0	0	0	0	2.32e-05	3.08e-05	0	2.64e-05
k__Bacteria;p__Tenericutes;c__Mollicutes;o__Mycoplasmatales;f__Mycoplasmataceae;g__Mycoplasma;	0	3.85e-05	0	0	0	0	0.000117082	0	0	0.000193289	5.44e-05	8.81e-05	0	0.000214675	0.000290265	9.3e-05	4.28e-05	2.43e-05	0	9.92e-05	0	0	0	7.41e-05	4.59e-05	0	2.17e-05	2.52e-05	2.12e-05	0	4.11e-05	0	4.63e-05	0	0	5.27e-05
k__Bacteria;p__Firmicutes;c__Clostridia;o__Clostridiales;f__Veillonellaceae;g__Desulfosporomusa;	0.000133091	0	0.000181884	0	0	0	0.00015611	0	0.000285592	0	0	0	0	0	0	0	0	0	0	3.31e-05	0	0	0	0	0	0	0	0	0	0	0	0	0	0	0	0
k__Bacteria;p__Actinobacteria;c__Actinobacteria;o__Actinomycetales;f__Nocardiaceae;g__Nocardia;	4.44e-05	3.85e-05	0.000136413	0	0	5.04e-05	0	0	0.000285592	3.87e-05	5.44e-05	0	0	0	3.63e-05	9.3e-05	0	0	0	0.000165273	0	0	0	0	0.000114671	2.24e-05	6.51e-05	2.52e-05	4.24e-05	0	0	0	0	0	3.63e-05	2.64e-05
k__Bacteria;p__Synergistetes;c__Synergistia;o__Synergistales;f__Dethiosulfovibrionaceae;g__TG5;	0	0	0	0	0	0	0	0	0.000285592	3.87e-05	0	0	0	0	0	0	0	0	2.48e-05	0	0	0	0	4.94e-05	2.29e-05	2.24e-05	2.17e-05	0	0	0	2.06e-05	0	0	3.08e-05	0	0
k__Bacteria;p__Firmicutes;c__Bacilli;o__Lactobacillales;f__Aerococcaceae;g__Aerococcus;	0	7.7e-05	4.55e-05	0	0	0	0	0	0	0	0	0	8.05e-05	0.000128805	0	0.00027894	0	7.28e-05	7.45e-05	9.92e-05	0.000116225	0	0.000212063	0.00014824	2.29e-05	2.24e-05	8.68e-05	2.52e-05	6.36e-05	2.7e-05	2.06e-05	0	2.32e-05	9.24e-05	0.000108968	5.27e-05
k__Bacteria;p__Actinobacteria;c__Actinobacteria;o__Actinomycetales;f__Gordoniaceae;g__Gordonia;	4.44e-05	0.000192485	0	0	0	0	3.9e-05	0	0.000142796	7.73e-05	5.44e-05	6.61e-05	4.02e-05	4.29e-05	3.63e-05	0.00027894	4.28e-05	0	0	3.31e-05	0	0	0	0	0	0	0	0	2.12e-05	0	0	2.65e-05	0	0	0	0
k__Bacteria;p__Firmicutes;c__Clostridia;o__Clostridiales;f__Peptostreptococcaceae;g__Peptostreptococcus;	4.44e-05	0	0	0	0	0	0	0	0	0	0	0	0	0.000128805	0.000108849	0.00027894	4.28e-05	2.43e-05	0	0	0	2.25e-05	0	0	0	4.48e-05	0	2.52e-05	2.12e-05	0	2.06e-05	0	2.32e-05	3.08e-05	0	2.64e-05
k__Bacteria;p__Firmicutes;c__Clostridia;o__Clostridiales;f__Eubacteriaceae;g__Acetobacterium;	0	0	0	0	0	0	0	0	0	0	5.44e-05	0	0	0	0	0.00027894	0	0	0	0	0	0	0	0	0	0	0	0	0	0	0	0	0	6.16e-05	0	5.27e-05
k__Bacteria;p__Firmicutes;c__Clostridia;o__Clostridiales;f__Clostridiaceae;g__Caloramator;	0.000133091	3.85e-05	0.000136413	0	0	0.000100867	0.000273192	0.000135266	8.57e-05	0.000115973	5.44e-05	2.2e-05	0	8.59e-05	0	0	0	0.00012133	4.97e-05	3.31e-05	3.87e-05	0	0.000181769	7.41e-05	9.17e-05	4.48e-05	2.17e-05	5.04e-05	0.000105923	8.1e-05	0.000205706	5.3e-05	0	0	0.000181613	5.27e-05
k__Bacteria;p__Bacteroidetes;c__Sphingobacteriia;o__Sphingobacteriales;f__Flexibacteraceae;g__Spirosoma;	0	7.7e-05	0	0	0	0	0.000273192	0	0	0	0	2.2e-05	0	0	3.63e-05	0	0	0	0	0	3.87e-05	0	3.03e-05	2.47e-05	0	0	0	0	0	0	0	0	0	0	0	0
k__Bacteria;p__Proteobacteria;c__Alphaproteobacteria;o__Rhodospirillales;f__Rhodospirillaceae;g__Rhodospirillum;	8.87e-05	0	0.000272826	0	0	0	0	0	0	0	5.44e-05	2.2e-05	0	4.29e-05	0	0	0	0	0	0	0	0	0	0	0	0	0	0	0	0	0	0	0	0	0	0
k__Bacteria;p__Proteobacteria;c__Gammaproteobacteria;o__Xanthomonadales;f__Sinobacteraceae;g__Nevskia;	0	0.00026948	0	0	0	5.04e-05	0	0	0	3.87e-05	0	4.41e-05	0.000120695	0	7.26e-05	9.3e-05	0	2.43e-05	0	9.92e-05	3.87e-05	0	3.03e-05	0	0	0	0	0	2.12e-05	5.4e-05	0.000143994	0	0	0.000154007	3.63e-05	2.64e-05
k__Bacteria;p__Actinobacteria;c__Actinobacteria;o__Actinomycetales;f__Actinomycetaceae;g__Mobiluncus;	0	0.00026948	0	0	0	0	0	0	0	0	0	0	0	0	0	0	0	0	0	0	0	0	0	0	0	0	0	0	0	2.7e-05	0	0	0	0	3.63e-05	0
k__Bacteria;p__Proteobacteria;c__Gammaproteobacteria;o__Enterobacteriales;f__Enterobacteriaceae;g__Proteus;	0.000266182	0.000192485	0	0	0	0	0	0	0	0	0	0	0	0.00017174	0.000253982	0	0	0	2.48e-05	0	0	6.76e-05	0	7.41e-05	2.29e-05	0	0	0	2.12e-05	0	2.06e-05	0	0	0	0	0
k__Bacteria;p__Proteobacteria;c__Epsilonproteobacteria;o__Campylobacterales;f__Helicobacteraceae;g__Sulfuricurvum;	0	3.85e-05	0	0	0	0	3.9e-05	0	0	0	0.000108737	0	0	0	0	0	0	4.85e-05	4.97e-05	0	0	0	0	0	2.29e-05	0.000111992	2.17e-05	0	4.24e-05	0.000216024	2.06e-05	0.000265132	0.000185314	0	0.000108968	7.91e-05
k__Bacteria;p__Bacteroidetes;c__Sphingobacteriia;o__Sphingobacteriales;f__Chitinophagaceae;g__Niastella;	0	0	0	0	0	0	0	0	0	0	0	0	0	0	0	0	0	4.85e-05	9.93e-05	0.000264437	3.87e-05	2.25e-05	0	2.47e-05	2.29e-05	2.24e-05	0	0	0	5.4e-05	0	0	0	0	0.000181613	0
k__Bacteria;p__Cyanobacteria;c__Oscillatoriophycideae;o__Chroococcales;f__Phormidiaceae;g__Microcoleus;	0	3.85e-05	0	0	0	0	0	0	2.86e-05	0	0	0	0	0	0	0	0	0	0	0.000264437	0	4.51e-05	6.06e-05	2.47e-05	0	2.24e-05	4.34e-05	2.52e-05	0	2.7e-05	8.23e-05	2.65e-05	2.32e-05	0	3.63e-05	0
k__Bacteria;p__Proteobacteria;c__Deltaproteobacteria;o__Myxococcales;f__Cystobacteraceae;g__Cystobacter;	0	0	0	0	0	0	0	0	0	0	0	0	0	4.29e-05	7.26e-05	0	0	0	0	0.000264437	3.87e-05	0	0	0	0	0	0	2.52e-05	6.36e-05	2.7e-05	0	0	6.95e-05	3.08e-05	0	2.64e-05
k__Bacteria;p__Actinobacteria;c__Actinobacteria;o__Actinomycetales;f__Thermomonosporaceae;g__Actinomadura;	4.44e-05	7.7e-05	9.09e-05	0.000130839	0	0	0	0	0	0	5.44e-05	2.2e-05	0	0	7.26e-05	0.00018596	0	0	0	0.000264437	0.000116225	0	0	0	0	0	0	2.52e-05	4.24e-05	5.4e-05	2.06e-05	5.3e-05	0	0	7.26e-05	2.64e-05
k__Bacteria;p__Proteobacteria;c__Gammaproteobacteria;o__Enterobacteriales;f__Enterobacteriaceae;g__Morganella;	4.44e-05	0	0	0.000261677	0	0	0	0	0	3.87e-05	0	0	4.02e-05	8.59e-05	0.000145133	0	0	2.43e-05	0	0	0	0.000135233	0	2.47e-05	0.000160539	2.24e-05	0	0	2.12e-05	2.7e-05	0	2.65e-05	0	0	3.63e-05	2.64e-05
k__Bacteria;p__Proteobacteria;c__Betaproteobacteria;o__Neisseriales;f__Neisseriaceae;g__Aquitalea;	0	3.85e-05	9.09e-05	0.000261677	0	0	0	0	0	0	0	2.2e-05	4.02e-05	0	0	0	0	4.85e-05	2.48e-05	0	0	0	0	4.94e-05	2.29e-05	0	0.000151959	5.04e-05	2.12e-05	5.4e-05	2.06e-05	0	0	0	0.000145291	2.64e-05
k__Bacteria;p__Bacteroidetes;c__Flavobacteriia;o__Flavobacteriales;f__Flavobacteriaceae;g__Bizionia;	8.87e-05	7.7e-05	0	0.000261677	5.09e-05	0	0.000195137	4.51e-05	0	3.87e-05	5.44e-05	2.2e-05	0	0	0	0	4.28e-05	0	7.45e-05	6.61e-05	3.87e-05	2.25e-05	9.09e-05	0	4.59e-05	8.96e-05	8.68e-05	2.52e-05	2.12e-05	2.7e-05	2.06e-05	2.65e-05	4.63e-05	9.24e-05	7.26e-05	0.000131843
k__Bacteria;p__Proteobacteria;c__Gammaproteobacteria;o__Chromatiales;f__Ectothiorhodospiraceae;g__Halorhodospira;	0	0	0	0.000261677	0	0	0	0	0	0	0	2.2e-05	0	0	0	0	0	0	0	0	0	0	0	0	0	0	0	0	0	0	0	0	2.32e-05	0	0	0
k__Bacteria;p__Tenericutes;c__Mollicutes;o__Anaeroplasmatales;f__Anaeroplasmataceae;g__RFN20;	0	0.000153988	0	0	0	0	0	0	0	0	0	2.2e-05	0	0.000128805	0.000253982	0	0	0	0	0	0	0	0	7.41e-05	0	0	0	2.52e-05	2.12e-05	0	2.06e-05	0	0	0	0	5.27e-05
k__Bacteria;p__Nitrospirae;c__Nitrospira;o__Nitrospirales;f__Thermodesulfovibrionaceae;g__BD2-6;	8.87e-05	0	0	0	0	0	0	0	0	0	0	0.000110178	0	0	0	0	0	0	2.48e-05	3.31e-05	3.87e-05	0	0	0	0.000252276	0	0	0	0	0	0	5.3e-05	0	0	0	2.64e-05
k__Bacteria;p__Firmicutes;c__Clostridia;o__Clostridiales;f__Eubacteriaceae;g__Anaerofustis;	0	3.85e-05	0	0	0	0.000252169	0	0	0	0	0	0	0	0	3.63e-05	0	0	0	0	0	0	0	0	0	0	0	0	0	0	0	0	0	0	0	0	0
k__Bacteria;p__Fusobacteria;c__Fusobacteria;o__Fusobacteriales;f__Fusobacteriaceae;g__Fusobacterium;	0	0	0	6.54e-05	0	0	0	2.25e-05	2.86e-05	0	5.44e-05	0	0	0	3.63e-05	9.3e-05	0	9.71e-05	0	0.000165273	7.75e-05	0.000135233	3.03e-05	0	0	2.24e-05	0.000195376	0.000100794	6.36e-05	0.000108012	0.000246848	0.000238619	0.000138985	6.16e-05	3.63e-05	7.91e-05
k__Bacteria;p__Verrucomicrobia;c__Opitutae;o__[Pelagicoccales];f__[Pelagicoccaceae];g__Pelagicoccus;	0.000221818	0.000153988	0	0	0	5.04e-05	0	0	2.86e-05	7.73e-05	5.44e-05	0.000242392	8.05e-05	0.000128805	0	0.00018596	0.000128287	0	0	0	0	0	0	0	0	0	0	0	0	0	0	0	0	0	0	0
k__Bacteria;p__Chloroflexi;c__Anaerolineae;o__Anaerolineales;f__Anaerolinaceae;g__WCHB1-05;	0.000133091	0	0	0	0	0	0.000234165	0	0	0	0	0.000132214	0	4.29e-05	7.26e-05	0	0	0	0	0	0	0	0	0	0	0	0	0	0	0	0	0.000106053	4.63e-05	0	0	0
k__Bacteria;p__Firmicutes;c__Clostridia;o__Clostridiales;f__Peptococcaceae;g__Pelotomaculum;	4.44e-05	0	0	0	0	0	0.000234165	0	0	0	0	0	0	0	0	0	0	0	0	0	0	0	0	0	0	0	0	0	0	0	0	0	0	0	0	0
k__Bacteria;p__Thermi;c__Deinococci;o__Thermales;f__Thermaceae;g__Thermus;	4.44e-05	0.000230982	0	0	0	5.04e-05	0	0	0	3.87e-05	5.44e-05	6.61e-05	0	0	7.26e-05	9.3e-05	0.000213812	2.43e-05	0	3.31e-05	0	0	3.03e-05	0	9.17e-05	2.24e-05	0	5.04e-05	4.24e-05	2.7e-05	0	0	2.32e-05	3.08e-05	0	2.64e-05
k__Bacteria;p__Firmicutes;c__Erysipelotrichi;o__Erysipelotrichales;f__Erysipelotrichaceae;g__Holdemania;	0	0	0	0	0	0	0	0	0	0	0	0	0	8.59e-05	0	0	0	2.43e-05	7.45e-05	3.31e-05	3.87e-05	2.25e-05	3.03e-05	0.000172946	0.000229342	0.000201586	6.51e-05	2.52e-05	6.36e-05	0.000108012	2.06e-05	2.65e-05	2.32e-05	3.08e-05	0	0
k__Bacteria;p__Synergistetes;c__Synergistia;o__Synergistales;f__Dethiosulfovibrionaceae;g__HA73;	0	0	0.000227355	0	0	0	0	0	0	0	0	0	0	0	0	0	0	0	0	3.31e-05	0	0	0	0	0	0	0	0	0	0	0	0	0	0	0	0
k__Bacteria;p__Chloroflexi;c__Anaerolineae;o__Anaerolineales;f__Anaerolinaceae;g__T78;	0.000221818	0	0.000181884	0	0	0	0	0	0.000199914	3.87e-05	0	8.81e-05	0	4.29e-05	0	0	0	0	0	3.31e-05	0	0	0	0	0	0	0	0	0.000148293	0	0	7.95e-05	6.95e-05	0	0	0
k__Bacteria;p__Proteobacteria;c__Deltaproteobacteria;o__Desulfovibrionales;f__Desulfovibrionaceae;g__Bilophila;	8.87e-05	0	0	0	0	0	0	0	0	0	0	2.2e-05	0	0	0	0	0	0.00012133	7.45e-05	9.92e-05	0.000116225	0.000112694	0.000151474	4.94e-05	4.59e-05	6.72e-05	0.000173668	0.000151191	0.000148293	0.000135015	4.11e-05	7.95e-05	0.000115821	6.16e-05	0.000217936	2.64e-05
k__Bacteria;p__Chloroflexi;c__Anaerolineae;o__Anaerolineales;f__Anaerolinaceae;g__C1_B004;	0	0	0	0	0	0	0	0	0	0	0	0	0	0	0	0	0	0	0	3.31e-05	0	0	0	0	0	0	0	0	0	0	0	0.000212106	4.63e-05	0	0	0
k__Bacteria;p__Bacteroidetes;c__Sphingobacteriia;o__Sphingobacteriales;f__Chitinophagaceae;g__Segetibacter;	0	0	0	0	0	0	0	0	0	0	0	0	0.000120695	0	0	0	0	0	2.48e-05	3.31e-05	0	2.25e-05	0	0	0.000114671	6.72e-05	2.17e-05	0	2.12e-05	2.7e-05	0	0	0	0	0	0.000210948
k__Bacteria;p__Actinobacteria;c__Actinobacteria;o__Actinomycetales;f__Sporichthyaceae;g__Sporichthya;	0	0	0	0	0	0	0	0	0	0	0	0	0	0	0	0	0	0	0	6.61e-05	0	0	0	0	0.000206408	0	0	0	0	0	0	0	0	0	0	5.27e-05
k__Bacteria;p__Actinobacteria;c__Actinobacteria;o__Bifidobacteriales;f__Bifidobacteriaceae;g__Gardnerella;	4.44e-05	0	0	0	0.000203759	0	0	0	0	0	0	0	0	0	0	0	0	7.28e-05	0	6.61e-05	0	0	0	0	0	0	2.17e-05	0	0	0	2.06e-05	0	0	3.08e-05	0	0
k__Bacteria;p__Bacteroidetes;c__Sphingobacteriia;o__Sphingobacteriales;f__Flexibacteraceae;g__Flectobacillus;	0	0	0	0	0.000203759	0	0	0	0	3.87e-05	0	2.2e-05	0	0	3.63e-05	0	0	0	0	0	0	0	0	2.47e-05	0	0	2.17e-05	0	0	8.1e-05	0	0	0	0	0	2.64e-05
k__Bacteria;p__Actinobacteria;c__Actinobacteria;o__Actinomycetales;f__Glycomycetaceae;g__Glycomyces;	0	0	0	0	0.000203759	0	0	0	0	0	0	0	0	0	0	0	0	0	0	0	0	0	0	0	0	0	0	0	0	0	0	0	0	0	0	0
k__Bacteria;p__Proteobacteria;c__Deltaproteobacteria;o__Desulfovibrionales;f__Desulfomicrobiaceae;g__Desulfomicrobium;	0	3.85e-05	0	0	0	0	3.9e-05	2.25e-05	0	0.000154631	0.000108737	4.41e-05	0.000201159	0	0	0.00018596	0	2.43e-05	2.48e-05	6.61e-05	0	0	0	0	0	2.24e-05	2.17e-05	0	4.24e-05	2.7e-05	0	0	2.32e-05	0	7.26e-05	2.64e-05
k__Bacteria;p__Thermi;c__Deinococci;o__Thermales;f__Thermaceae;g__Meiothermus;	0	3.85e-05	4.55e-05	0	0	0	0	0	0.000199914	0	0	0	0	0	3.63e-05	0	0	0	0	3.31e-05	3.87e-05	0	0	2.47e-05	0	0.000134391	0	0	0	2.7e-05	2.06e-05	0	0	0	0	5.27e-05
k__Bacteria;p__Actinobacteria;c__Actinobacteria;o__Actinomycetales;f__Micromonosporaceae;g__Catellatospora;	0	0	0	0	0	0	3.9e-05	0	0.000199914	0	0	0	0	0	7.26e-05	0	0	0	0	0.000132218	0	2.25e-05	0	0	0	0	2.17e-05	0	4.24e-05	0	0	0	4.63e-05	0	0	0
k__Bacteria;p__Firmicutes;c__Erysipelotrichi;o__Erysipelotrichales;f__Erysipelotrichaceae;g__PSB-M-3;	0	0	0	0	0	0	0	0	0	0	0	0	0	0	0	0	0	4.85e-05	7.45e-05	0.000198327	3.87e-05	2.25e-05	9.09e-05	2.47e-05	0	6.72e-05	2.17e-05	2.52e-05	2.12e-05	5.4e-05	6.17e-05	0.000159079	2.32e-05	0	0.000145291	0
k__Bacteria;p__Proteobacteria;c__Deltaproteobacteria;o__Myxococcales;f__Haliangiaceae;g__Haliangium;	0	0	0	0	0	0	0	0	0	0	0	0	0	0	0	0	0	0	2.48e-05	0.000198327	0	0	0	4.94e-05	0.000137605	2.24e-05	0	0	0	2.7e-05	0	2.65e-05	2.32e-05	0	3.63e-05	2.64e-05
k__Bacteria;p__Nitrospirae;c__Nitrospira;o__Nitrospirales;f__Thermodesulfovibrionaceae;g__HB118;	0	3.85e-05	0	0	0	0	3.9e-05	2.25e-05	0	0	0	0.000198321	0	0	0	0	4.28e-05	0	0	0	3.87e-05	0	0	0	0	0	0	0	0	0	0	0	6.95e-05	0	0	0
k__Bacteria;p__Planctomycetes;c__Planctomycetia;o__Pirellulales;f__Pirellulaceae;g__Pirellula;	0	0.000153988	0	0.000196258	0	0	0	0	0.000114237	0	0	0	0	0	0	0	0	0	0	3.31e-05	0	0	0	0	9.17e-05	0	2.17e-05	2.52e-05	4.24e-05	0	2.06e-05	0	2.32e-05	0	3.63e-05	0
k__Bacteria;p__Bacteroidetes;c__Sphingobacteriia;o__Sphingobacteriales;f__Sphingobacteriaceae;g__Parapedobacter;	0	0	0.000136413	0	0	0	0.000195137	0	0	7.73e-05	0	4.41e-05	0	0	0	0	0	0	0	0	0	0	0	0	0	0	0	0	0	0	0	0	0	0	0	0
k__Bacteria;p__Elusimicrobia;c__Elusimicrobia;o__Elusimicrobiales;f__Elusimicrobiaceae;g__Elusimicrobium;	0	0	0	0	0	0	0	0	0	0	0	0	0	0	0	0	0	2.43e-05	0	3.31e-05	0.000193708	2.25e-05	0	0	0	0	2.17e-05	0	4.24e-05	2.7e-05	0	2.65e-05	0	0	3.63e-05	0
k__Bacteria;p__Proteobacteria;c__Deltaproteobacteria;o__Desulfobacterales;f__Nitrospinaceae;g__Nitrospina;	0.000177454	0.000192485	0	0	0	0	7.81e-05	2.25e-05	0	3.87e-05	0	6.61e-05	0	4.29e-05	3.63e-05	0	0	0	0	0	0	0	0	0	0	0	0	0	0	0	0	0	0	0	0	0
k__Bacteria;p__Firmicutes;c__Bacilli;o__Bacillales;f__Thermoactinomycetaceae;g__Thermoactinomyces;	0	0.000192485	4.55e-05	0	0	0	0	0	0	0	0	0	4.02e-05	0	0.000145133	0	0	0	0	0	0	0	0	2.47e-05	0	0	2.17e-05	0	0	0	0	2.65e-05	4.63e-05	0	0	5.27e-05
k__Bacteria;p__Cyanobacteria;c__Oscillatoriophycideae;o__Chroococcales;f__Cyanobacteriaceae;g__Cyanobacterium;	0	0	0	0	0	0	0	0	0	0	0	0	0	0	0	0	0	0	0	0	0	0	0	0	0	0	0	0	0	0.000189021	4.11e-05	0	0	0	0	0
k__Bacteria;p__Actinobacteria;c__Actinobacteria;o__Actinomycetales;f__Catenulisporaceae;g__Catenulispora;	0	0	0	0	0	0	0	0	0	0	5.44e-05	2.2e-05	0	4.29e-05	0	0.00018596	4.28e-05	0	0	6.61e-05	0	0	0	0	0	0	0	0	0	0	0	2.65e-05	0	0	0	0
k__Bacteria;p__Proteobacteria;c__Alphaproteobacteria;o__Rhizobiales;f__Bradyrhizobiaceae;g__Bosea;	0	3.85e-05	0	0	0	0	0	0	0	0	0	0	0	0	0.000108849	0.00018596	0	2.43e-05	0	3.31e-05	0	2.25e-05	0	0	0	0	0	0	0	0	2.06e-05	0	0	0	0	0
k__Bacteria;p__Proteobacteria;c__Gammaproteobacteria;o__Methylococcales;f__Methylococcaceae;g__Methylomonas;	0	0	0	0	0	0	0	0	0	0	0.000108737	4.41e-05	0	0	0	0.00018596	0	0	0	0	0	0	0	0	4.59e-05	0	0	2.52e-05	0	0	0	5.3e-05	0.000115821	3.08e-05	0	2.64e-05
k__Bacteria;p__Firmicutes;c__Bacilli;o__Bacillales;f__Planococcaceae;g__Solibacillus;	8.87e-05	0	0	0	0	0	0	2.25e-05	0	0	0	0	0	0.00017174	0	0	8.55e-05	0	2.48e-05	6.61e-05	0	2.25e-05	0	2.47e-05	0.000183474	2.24e-05	2.17e-05	5.04e-05	2.12e-05	0	0	0	4.63e-05	3.08e-05	3.63e-05	2.64e-05
k__Bacteria;p__Synergistetes;c__Synergistia;o__Synergistales;f__TTA_B6;g__E6;	0	0	0.000181884	0	0	0	0	0	0	3.87e-05	0	4.41e-05	0	0	3.63e-05	0	0	0	0	0	0	0	0	0	0	0	0	0	0	0	0	0	0	0	0	0
k__Bacteria;p__Proteobacteria;c__Gammaproteobacteria;o__Alteromonadales;f__Alteromonadaceae;g__Candidatus Endobugula;	0.000133091	3.85e-05	0	0	0	0	0	0	0	0	0	0	0	0.000128805	0	0	0	2.43e-05	7.45e-05	0	3.87e-05	0.00018031	6.06e-05	0	0	2.24e-05	0	0	6.36e-05	0	2.06e-05	0	0	0	3.63e-05	2.64e-05
k__Bacteria;p__Proteobacteria;c__Deltaproteobacteria;o__Syntrophobacterales;f__Desulfobacteraceae;g__Desulfotignum;	0.000177454	0	0	0	0	0	0	0	0	0	0	0	0	0	0	0	0	0	0	0	0	2.25e-05	0	0	0	0	0	0	2.12e-05	0	0	0	0	0	0	0
k__Bacteria;p__Firmicutes;c__Clostridia;o__Clostridiales;f__Clostridiaceae;g__Anaerococcus;	8.87e-05	0.000153988	0	0	0	0	3.9e-05	0	0	3.87e-05	5.44e-05	2.2e-05	0	0.00017174	0.000108849	9.3e-05	0	0	2.48e-05	0	3.87e-05	0	0	0	0	0	2.17e-05	0	2.12e-05	0	4.11e-05	2.65e-05	0	0	3.63e-05	0
k__Bacteria;p__Proteobacteria;c__Gammaproteobacteria;o__Alteromonadales;f__Pseudoalteromonadaceae;g__Pseudoalteromonas;	0.000133091	0	0	0	0	0	0	0	0	0	0	0	0	0.00017174	0	0	0	0	0	0	0	0	0	0	0	0	0	0	0	0	0	0	0	0	0	0
k__Bacteria;p__Caldithrix;c__Caldithrixae;o__Caldithrixales;f__Caldithrixaceae;g__LCP-26;	0	0	0	0	0	0	0	0	0.000171355	0	0	0	0	0	0	0	0	0	0	0	0	0	0	0	0	0	0	0	0	0	0	0	2.32e-05	0	0	0
k__Bacteria;p__Firmicutes;c__Clostridia;o__Thermoanaerobacterales;f__Thermoanaerobacteraceae;g__Tepidanaerobacter;	0	0	0	0	0	0	0	0	0	0	0	0	0	0	0	0	0	0	0	0	0	0	3.03e-05	0	0	4.48e-05	0	0	0.000169477	0	2.06e-05	2.65e-05	0	0	0	0
k__Bacteria;p__Proteobacteria;c__Gammaproteobacteria;o__Acidithiobacillales;f__Acidithiobacillaceae;g__Acidithiobacillus;	0	0	0	0	0	0	0	0	0	0	0	0	0	0	0	0	0	0	4.97e-05	0.000165273	0	0	0	0	2.29e-05	0	0	0	0	0	4.11e-05	2.65e-05	0	0	0	0
k__Bacteria;p__Nitrospirae;c__Nitrospira;o__Nitrospirales;f__Leptospirillaceae;g__Leptospirillum;	0	0	0	0	0	0	0	0	0	0	0	0	0	0	0	0	0	0	0	0.000165273	0	0	3.03e-05	4.94e-05	0	0	0	0	0	2.7e-05	0	2.65e-05	0	0	0	0
k__Archaea;p__Euryarchaeota;c__Methanomicrobia;o__Methanocellales;f__Methanocellaceae;g__Methanocella;	0	0	0	0	0	0	0	0	0	0	0.000163106	0	0	0	0	0	0	0	0	0	0	0	0	0	0	0	0	0	0	0	0	0	0	0	0	0
k__Bacteria;p__Cyanobacteria;c__Oscillatoriophycideae;o__Chroococcales;f__Microcystaceae;g__Microcystis;	0	0	0	0	0	0	0	0	0	0	0	0	0.000160927	0	3.63e-05	0	0	0	0	0	0	0	0	0	0	0	0	0	0	0.000108012	2.06e-05	0	0	0	0	0
k__Bacteria;p__Proteobacteria;c__Gammaproteobacteria;o__Oceanospirillales;f__Halomonadaceae;g__Cobetia;	4.44e-05	0.000153988	0	0	0	0	3.9e-05	4.51e-05	2.86e-05	3.87e-05	0	4.41e-05	0.000160927	0	0.000145133	0	0	0	0	3.31e-05	3.87e-05	0	0	0	6.88e-05	2.24e-05	6.51e-05	0	2.12e-05	0	0	2.65e-05	0	0	3.63e-05	0
k__Bacteria;p__Proteobacteria;c__Deltaproteobacteria;o__Syntrophobacterales;f__Syntrophaceae;g__Syntrophus;	4.44e-05	3.85e-05	0.000136413	0	0	0	0	0	0	0	5.44e-05	0	0	4.29e-05	0.000145133	0	4.28e-05	0	2.48e-05	3.31e-05	0	0	0	2.47e-05	0	0	0	0	4.24e-05	5.4e-05	0	0.000159079	9.27e-05	3.08e-05	0	0
k__Bacteria;p__Proteobacteria;c__Deltaproteobacteria;o__Syntrophobacterales;f__Desulfobacteraceae;g__Desulfosarcina;	0	0	0	0	0	0	0	0	0	0	0	0	0	0	0	0	0	2.43e-05	0	3.31e-05	7.75e-05	2.25e-05	3.03e-05	0	0.000137605	4.48e-05	0	5.04e-05	2.12e-05	2.7e-05	0	0	4.63e-05	3.08e-05	0	0.000158211
k__Bacteria;p__Bacteroidetes;c__Flavobacteriia;o__Flavobacteriales;f__Flavobacteriaceae;g__Mesonia;	0	3.85e-05	0	0	0	0	0.00015611	4.51e-05	0	0	5.44e-05	0	0	0	0	0	0	0	0	6.61e-05	3.87e-05	0	0	2.47e-05	0	0	0	0	0	0	0	0	0	0	0	0
k__Bacteria;p__Proteobacteria;c__Alphaproteobacteria;o__Rhodospirillales;f__Acetobacteraceae;g__Acidocella;	0	0	0	0	0	0	0.00015611	0	2.86e-05	0	0	2.2e-05	0	0	0	0	0	0	0	0	0	0	0	0	0	0	0	0	0	0	0	0	0	0	0	0
k__Bacteria;p__Proteobacteria;c__Alphaproteobacteria;o__Rhodospirillales;f__Rhodospirillaceae;g__Oleomonas;	8.87e-05	0	0	0	0	0	0	0	0	3.87e-05	0	0.00015425	0	0	0	0	0	0	0	0	0	0	0	0	0	0	0	0	0	0	0	0	0	0	0	0
k__Bacteria;p__Armatimonadetes;c__[Fimbriimonadetes];o__[Fimbriimonadales];f__[Fimbriimonadaceae];g__Fimbriimonas;	8.87e-05	3.85e-05	0	0	0	0.000100867	0	0	0	7.73e-05	5.44e-05	0.00015425	0	0	0	9.3e-05	4.28e-05	0	2.48e-05	0	0	0	0	4.94e-05	2.29e-05	0	2.17e-05	0	4.24e-05	0	2.06e-05	0	2.32e-05	3.08e-05	3.63e-05	0
k__Bacteria;p__Firmicutes;c__Bacilli;o__Bacillales;f__Bacillaceae;g__Marinococcus;	0	0.000153988	0	0	0	0	0	0	0	0	0	2.2e-05	0	0	7.26e-05	0	0	0	0	0	0	2.25e-05	3.03e-05	0	0	0	0	0	0	0	0	0	2.32e-05	3.08e-05	0	0
k__Bacteria;p__Proteobacteria;c__Zetaproteobacteria;o__Mariprofundales;f__Mariprofundaceae;g__Mariprofundus;	0	0.000153988	0	0	0	5.04e-05	0	0	0	0	0	2.2e-05	0	0	3.63e-05	0	0	0	0	0	0	0	0	0	0	0	0	0	0	0	0	0	0	0	0	0
k__Bacteria;p__Proteobacteria;c__Gammaproteobacteria;o__Thiotrichales;f__Piscirickettsiaceae;g__Thiomicrospira;	4.44e-05	0.000153988	0	0	0	0	0	0	0	3.87e-05	0	4.41e-05	0	0	3.63e-05	0	0	0	0	0	0	0	0	0	0	0	0	0	0	0	0	0	0	0	0	0
k__Bacteria;p__Proteobacteria;c__Alphaproteobacteria;o__Rhizobiales;f__Phyllobacteriaceae;g__Mesorhizobium;	4.44e-05	0	0	0	0.00015282	0	0	0	0	0	5.44e-05	0	0	4.29e-05	0	0	0	0	0	0	0	0	3.03e-05	0	0	0	0	2.52e-05	2.12e-05	0	0	0	0	0	0	0
k__Bacteria;p__Proteobacteria;c__Gammaproteobacteria;o__Chromatiales;f__Halothiobacillaceae;g__Thiofaba;	4.44e-05	0	0	0	0	0.000151301	0	0	0	0	0	0	0	0	0	0	0	0	0	0	0	0	0	0	0	0	0	0	0	0	0	0	0	0	0	0
k__Bacteria;p__Bacteroidetes;c__Sphingobacteriia;o__Sphingobacteriales;f__Sphingobacteriaceae;g__Pedobacter;	0	3.85e-05	0	0	0	5.04e-05	0	2.25e-05	0	0	5.44e-05	0	0	8.59e-05	0.000145133	9.3e-05	0	2.43e-05	2.48e-05	0	3.87e-05	2.25e-05	3.03e-05	2.47e-05	0	0	0	0	0.000105923	2.7e-05	2.06e-05	0	2.32e-05	0	0	2.64e-05
k__Archaea;p__Euryarchaeota;c__Methanomicrobia;o__Methanosarcinales;f__Methanosaetaceae;g__Methanosaeta;	0	0	0	0	0	0	0	0	0.000142796	0	0	2.2e-05	0	0	0.000145133	0	4.28e-05	0	0	0	0	0	0	0	0	0	0	0	2.12e-05	0	0	2.65e-05	2.32e-05	0	0	0
k__Bacteria;p__Proteobacteria;c__Gammaproteobacteria;o__Alteromonadales;f__Psychromonadaceae;g__Psychromonas;	0	7.7e-05	0	0	0	0	0	0	0	0	0	0	0	0	0.000145133	0	0	0	0	3.31e-05	0	6.76e-05	6.06e-05	0	4.59e-05	8.96e-05	2.17e-05	2.52e-05	6.36e-05	2.7e-05	0	0	2.32e-05	0	0	2.64e-05
k__Bacteria;p__Synergistetes;c__Synergistia;o__Synergistales;f__Dethiosulfovibrionaceae;g__PD-UASB-13;	0	0	0.000136413	0	0	0	0	0	0	0	0	2.2e-05	0	8.59e-05	0.000145133	0	0	0	0	0	0	2.25e-05	0	2.47e-05	0	0	0	0	0	0	0	0	0	0	0	5.27e-05
k__Bacteria;p__Verrucomicrobia;c__[Spartobacteria];o__[Chthoniobacterales];f__[Chthoniobacteraceae];g__Ellin506;	0	3.85e-05	0	0	0	0	0	0	0.000142796	0	0	0	0	0	0	0	0	0	4.97e-05	3.31e-05	3.87e-05	0	0	0	0	4.48e-05	4.34e-05	0	2.12e-05	0	4.11e-05	0	0	0	0	2.64e-05
k__Bacteria;p__Proteobacteria;c__Alphaproteobacteria;o__Rhizobiales;f__Xanthobacteraceae;g__Labrys;	0	0	0	0	0	0	0	0	0	0	0	0	0	0	0	0	4.28e-05	0	0	6.61e-05	3.87e-05	0	0	0	0.000137605	2.24e-05	2.17e-05	0	0	0	2.06e-05	2.65e-05	2.32e-05	0	0	0
k__Bacteria;p__Proteobacteria;c__Gammaproteobacteria;o__Alteromonadales;f__Alteromonadaceae;g__Microbulbifer;	0	0	0	0	0	0	0	0	0	0	0	0	0	0	0	0	0	0	0	0	0	0	0	0	0.000137605	0	0	0	0	0	0	0	0	0	0	0
k__Bacteria;p__Firmicutes;c__Clostridia;o__Clostridiales;f__Lachnospiraceae;g__Pseudobutyrivibrio;	0	0	0.000136413	6.54e-05	0	5.04e-05	0	6.76e-05	0	0	5.44e-05	4.41e-05	0	0	0	0	0	0	0	0	0	0	0	0	0	0	0	0	0	0	0	0	0	0	0	0
k__Bacteria;p__Firmicutes;c__Bacilli;o__Bacillales;f__Bacillaceae;g__Oceanobacillus;	0.000133091	0	0	0.000130839	0	0.000100867	3.9e-05	0	0	3.87e-05	0	6.61e-05	8.05e-05	4.29e-05	0	0	0	0	0	9.92e-05	0	0	0	2.47e-05	0	2.24e-05	4.34e-05	0	2.12e-05	0	0	0	0	0	0	0
k__Bacteria;p__Actinobacteria;c__Actinobacteria;o__Actinomycetales;f__Streptosporangiaceae;g__Nonomuraea;	0	0	0	0	0	0	0	0	0	0	0	0	0	0	0	0	0	0	0	0.000132218	0	2.25e-05	3.03e-05	2.47e-05	0	2.24e-05	0	2.52e-05	2.12e-05	0	4.11e-05	0	2.32e-05	3.08e-05	3.63e-05	2.64e-05
k__Bacteria;p__Actinobacteria;c__Thermoleophilia;o__Solirubrobacterales;f__Patulibacteraceae;g__Patulibacter;	0	0	0	0	0	0	0	0	0	0	0	0	0	0	0	0	0	2.43e-05	0	0.000132218	0	2.25e-05	0	2.47e-05	0	0	2.17e-05	0	0	0	0	0	0	0	0	2.64e-05
k__Bacteria;p__Proteobacteria;c__Deltaproteobacteria;o__Myxococcales;f__Myxococcaceae;g__Myxococcus;	0	0	0	0	0	0	0	0	0	0	0	0	0	0	0	0	0	2.43e-05	2.48e-05	0.000132218	0	0	0	0	0	0	0	0	0	0	2.06e-05	0	4.63e-05	0	0	0
k__Bacteria;p__Firmicutes;c__Clostridia;o__Clostridiales;f__Veillonellaceae;g__Selenomonas;	0	0	0	0	0	5.04e-05	0	0	0	0	0	2.2e-05	0	0	0	0	0	0	0	0	0	0	0	0	2.29e-05	4.48e-05	6.51e-05	2.52e-05	0	2.7e-05	0	0	0	0	3.63e-05	0.000131843
k__Bacteria;p__Proteobacteria;c__Gammaproteobacteria;o__Cardiobacteriales;f__Cardiobacteriaceae;g__Cardiobacterium;	0	0	0	0	0	0	0	0	0	0	0	2.2e-05	0	0.000128805	3.63e-05	0	4.28e-05	0	0	3.31e-05	0	0	0	0	0	4.48e-05	6.51e-05	0	0	0	0	0	0	3.08e-05	0	0
k__Bacteria;p__Firmicutes;c__Bacilli;o__Bacillales;f__Staphylococcaceae;g__Jeotgalicoccus;	0	3.85e-05	0	0	0	0	3.9e-05	0	2.86e-05	0	0	2.2e-05	0.000120695	0	3.63e-05	0	0	0	2.48e-05	3.31e-05	7.75e-05	2.25e-05	0	7.41e-05	0	8.96e-05	0	2.52e-05	2.12e-05	0	0	0	4.63e-05	0	0	2.64e-05
k__Bacteria;p__Actinobacteria;c__Actinobacteria;o__Actinomycetales;f__Micromonosporaceae;g__Virgisporangium;	0	0	0	0	0	0	0	0	0	0	0	0	0	0	0	0	0	2.43e-05	4.97e-05	3.31e-05	0.000116225	2.25e-05	0	0	0	0	6.51e-05	2.52e-05	2.12e-05	2.7e-05	0	0	0	3.08e-05	0	5.27e-05
k__Bacteria;p__Firmicutes;c__Clostridia;o__Clostridiales;f__Veillonellaceae;g__Acidaminococcus;	8.87e-05	0	4.55e-05	0	0	0	0	0	0	0	0	0	0	0	7.26e-05	9.3e-05	0	2.43e-05	0	0	0.000116225	6.76e-05	0	9.88e-05	0	8.96e-05	4.34e-05	0	2.12e-05	8.1e-05	0	5.3e-05	4.63e-05	9.24e-05	0	0
k__Bacteria;p__Firmicutes;c__Clostridia;o__Clostridiales;f__Clostridiaceae;g__Sedimentibacter;	4.44e-05	0	9.09e-05	0	0	0	0	2.25e-05	0	0	0	2.2e-05	0	0	3.63e-05	0	0	0	0	6.61e-05	0.000116225	0	0	2.47e-05	4.59e-05	0	0	2.52e-05	0	0	0	2.65e-05	0	9.24e-05	0	2.64e-05
k__Bacteria;p__Firmicutes;c__Clostridia;o__Clostridiales;f__Lachnospiraceae;g__Moryella;	0	0	4.55e-05	0	0	0	0	0	0	0.000115973	0	2.2e-05	0	0	0	0	0	4.85e-05	2.48e-05	3.31e-05	3.87e-05	2.25e-05	6.06e-05	0	0	2.24e-05	2.17e-05	0.000100794	2.12e-05	0	2.06e-05	0	2.32e-05	3.08e-05	3.63e-05	0
k__Bacteria;p__Bacteroidetes;c__Flavobacteriia;o__Flavobacteriales;f__Flavobacteriaceae;g__Lutimonas;	0	3.85e-05	0	0	0	0	7.81e-05	0	5.71e-05	0.000115973	0.000108737	4.41e-05	0	0	3.63e-05	0	0	0	0	0	0	2.25e-05	3.03e-05	2.47e-05	0	2.24e-05	2.17e-05	2.52e-05	0	0	0	0	2.32e-05	0	3.63e-05	2.64e-05
k__Bacteria;p__Verrucomicrobia;c__[Spartobacteria];o__[Chthoniobacterales];f__[Chthoniobacteraceae];g__heteroC45_4W;	4.44e-05	0	0	0	0	0	0	0	0	0.000115973	0	2.2e-05	0	0	0	0	0	0	0	0	0	0	0	0	0	0	0	0	0	0	0	0	0	0	0	0
k__Bacteria;p__Proteobacteria;c__Alphaproteobacteria;o__Rhodospirillales;f__Rhodospirillaceae;g__Novispirillum;	0	0.000115491	0	0	5.09e-05	0	0	0	0	3.87e-05	5.44e-05	0	0	0	0	0	0	0	0	0	0	0	0	2.47e-05	0	0	2.17e-05	0	2.12e-05	0	0	0	0	3.08e-05	0	0
k__Bacteria;p__Bacteroidetes;c__Bacteroidia;o__Bacteroidales;f__Porphyromonadaceae;g__Porphyromonas;	0	0.000115491	0	0	0	0	0	2.25e-05	0	0	0	0.000110178	4.02e-05	8.59e-05	7.26e-05	9.3e-05	0	2.43e-05	7.45e-05	0	3.87e-05	0	3.03e-05	7.41e-05	9.17e-05	2.24e-05	2.17e-05	5.04e-05	4.24e-05	2.7e-05	4.11e-05	2.65e-05	2.32e-05	0	0	5.27e-05
k__Bacteria;p__Bacteroidetes;c__Sphingobacteriia;o__Sphingobacteriales;f__Balneolaceae;g__Balneola;	4.44e-05	0.000115491	0	0	0	5.04e-05	3.9e-05	0	0	0	5.44e-05	2.2e-05	4.02e-05	0	0.000108849	0	0	2.43e-05	0	0	0	2.25e-05	3.03e-05	0	0	2.24e-05	2.17e-05	0	0	2.7e-05	2.06e-05	0	0	0	0	2.64e-05
k__Bacteria;p__Actinobacteria;c__Actinobacteria;o__Actinomycetales;f__Actinomycetaceae;g__Varibaculum;	0	0.000115491	0	0	0	0	0	0	0	3.87e-05	0	0	0	0	0	0	0	0	0	0	0	0	0	2.47e-05	4.59e-05	0	0	0	0	0	0	0	0	0	0	2.64e-05
k__Bacteria;p__Actinobacteria;c__Actinobacteria;o__Actinomycetales;f__Nocardioidaceae;g__Propionicimonas;	0	0.000115491	0	0	0	0	0	0	0	0	0	0	0	0	3.63e-05	0	0	0	0	0	0	0	0	0	0	0	0	0	0	0	0	0	0	0	0	0
k__Bacteria;p__Proteobacteria;c__Alphaproteobacteria;o__Rhodospirillales;f__Rhodospirillaceae;g__Phaeospirillum;	0	0	0	0	0	0	0	0	0.000114237	0	0	0	0	0	0	0	4.28e-05	0	0	9.92e-05	3.87e-05	0	0	2.47e-05	0	0	0	2.52e-05	0	0	4.11e-05	0	0	0	0	0
k__Bacteria;p__Proteobacteria;c__Gammaproteobacteria;o__Thiotrichales;f__Piscirickettsiaceae;g__Cycloclasticus;	0	0	0	0	0	5.04e-05	3.9e-05	0.000112722	0	3.87e-05	0	0	0	0	3.63e-05	0	0	0	0	3.31e-05	3.87e-05	0	0	7.41e-05	0	0	0	5.04e-05	0	0	0	2.65e-05	4.63e-05	0	0	0.000105474
k__Bacteria;p__Chloroflexi;c__Chloroflexi;o__Roseiflexales;f__Kouleothrixaceae;g__Kouleothrix;	0	0	0	0	0	0	0	0	0	0	0	0	0	0	0	0	0	0	0	0	0	0	0	0	0	0.000111992	0	0	0	0	0	0	0	0	0	2.64e-05
k__Bacteria;p__Firmicutes;c__Clostridia;o__Clostridiales;f__Lachnospiraceae;g__Oribacterium;	0	0	0	0	0	0	0	0	0	0	0	0	0	4.29e-05	0	0	0	4.85e-05	4.97e-05	9.92e-05	0	4.51e-05	9.09e-05	4.94e-05	4.59e-05	0.000111992	4.34e-05	0.000100794	2.12e-05	0	0	2.65e-05	4.63e-05	3.08e-05	7.26e-05	0.000105474
k__Bacteria;p__Bacteroidetes;c__Sphingobacteriia;o__Sphingobacteriales;f__Flexibacteraceae;g__Adhaeribacter;	0	0	0	0	0	0	0	0	0	3.87e-05	0	0	0	0	0	0	0	0	0	3.31e-05	0	4.51e-05	6.06e-05	2.47e-05	2.29e-05	0	2.17e-05	0	4.24e-05	0	2.06e-05	2.65e-05	0	0	0.000108968	2.64e-05
k__Bacteria;p__Firmicutes;c__Erysipelotrichi;o__Erysipelotrichales;f__[Coprobacillaceae];g__Sharpea;	0	0	0	0	0	0	0	0	0	0	0	0	0	0	0	0	0	0	2.48e-05	0	3.87e-05	0	3.03e-05	7.41e-05	0	0	0	5.04e-05	2.12e-05	2.7e-05	2.06e-05	0	0	0	0.000108968	2.64e-05
k__Bacteria;p__Proteobacteria;c__Gammaproteobacteria;o__Xanthomonadales;f__Xanthomonadaceae;g__Ignatzschineria;	4.44e-05	7.7e-05	0	0	0	0	0	0	0	0	0	0	0	0	0.000108849	0	0	0	0	0	0	0	0	0	0	0	0	0	0	0	0	0	0	0	0	0
k__Bacteria;p__Chlamydiae;c__Chlamydiia;o__Chlamydiales;f__Rhabdochlamydiaceae;g__Candidatus Rhabdochlamydia;	0	3.85e-05	0	0	0	0	7.81e-05	0	0	3.87e-05	0.000108737	4.41e-05	0	0	0	0	0	0	0	0	0	0	0	0	9.17e-05	0	0	0	0	2.7e-05	0	2.65e-05	0	0	0	0
k__Bacteria;p__Firmicutes;c__Erysipelotrichi;o__Erysipelotrichales;f__Erysipelotrichaceae;g__Bulleidia;	4.44e-05	0	0	6.54e-05	5.09e-05	0	0	0	2.86e-05	0	0.000108737	0	0	0	0	0	0	0	0	0	3.87e-05	2.25e-05	0	2.47e-05	4.59e-05	4.48e-05	2.17e-05	0.000100794	4.24e-05	8.1e-05	2.06e-05	5.3e-05	0	9.24e-05	3.63e-05	0
k__Bacteria;p__Bacteroidetes;c__Sphingobacteriia;o__Sphingobacteriales;f__Flexibacteraceae;g__Dyadobacter;	8.87e-05	0	0	0	0	5.04e-05	0	0	0	0	0	0	0	0	3.63e-05	0	0	2.43e-05	2.48e-05	0	0	0	6.06e-05	2.47e-05	0	0	4.34e-05	0	4.24e-05	2.7e-05	4.11e-05	0	0	0	0	0.000105474
k__Bacteria;p__Bacteroidetes;c__Flavobacteriia;o__Flavobacteriales;f__Flavobacteriaceae;g__Robiginitalea;	0	0	0	0	0	0	0	0	0	0	0	0	0	0	0	0	4.28e-05	0	0	0	0	0	0	0	0	6.72e-05	0	2.52e-05	0	0	0	5.3e-05	0	0	0	0.000105474
k__Bacteria;p__Proteobacteria;c__Gammaproteobacteria;o__Enterobacteriales;f__Enterobacteriaceae;g__Candidatus Phlomobacter;	0	0	0	0	0	5.04e-05	0	0	2.86e-05	0	0	0	0	0	0	0	0	9.71e-05	0	6.61e-05	3.87e-05	4.51e-05	0	2.47e-05	2.29e-05	2.24e-05	4.34e-05	0	8.47e-05	5.4e-05	6.17e-05	0	6.95e-05	6.16e-05	7.26e-05	0.000105474
k__Bacteria;p__Synergistetes;c__Synergistia;o__Synergistales;f__Synergistaceae;g__vadinCA02;	0	0	0	0	0	0	0	0	0	0	0	0	0	0	3.63e-05	0	0	0	0	0	0	0	0	0	0	0	0	0	6.36e-05	0	2.06e-05	0	0	6.16e-05	0	0.000105474
k__Bacteria;p__Actinobacteria;c__Actinobacteria;o__Actinomycetales;f__Pseudonocardiaceae;g__Prauserella;	0	0	0	0	0.00010188	0	0	0	0	0	0	0	0	0	0	0	0	0	0	0	0	0	0	0	0	0	0	0	0	0	0	0	0	0	0	0
k__Bacteria;p__Firmicutes;c__Clostridia;o__Clostridiales;f__Ruminococcaceae;g__Anaerotruncus;	0	0	0	0	0	0	0	0	0	0	0	0	0	0	0	0	0	9.71e-05	9.93e-05	3.31e-05	3.87e-05	2.25e-05	6.06e-05	9.88e-05	4.59e-05	8.96e-05	6.51e-05	5.04e-05	2.12e-05	2.7e-05	8.23e-05	2.65e-05	9.27e-05	3.08e-05	3.63e-05	7.91e-05
k__Bacteria;p__Chloroflexi;c__Anaerolineae;o__Anaerolineales;f__Anaerolinaceae;g__Longilinea;	0	0	0	0	0	0	0	0	0	0	0	0	0	0	0	0	0	0	0	9.92e-05	0	0	0	2.47e-05	0	0	0	0	0	0	0	0	0	6.16e-05	0	0
k__Bacteria;p__Proteobacteria;c__Gammaproteobacteria;o__Xanthomonadales;f__Xanthomonadaceae;g__Dyella;	4.44e-05	3.85e-05	0	0	0	0	0	0	0	0	0	4.41e-05	0	0	7.26e-05	0	4.28e-05	0	0	9.92e-05	0	0	0	0	0	0	0	0	0	2.7e-05	0	0	0	0	7.26e-05	0
k__Bacteria;p__Proteobacteria;c__Alphaproteobacteria;o__Rhodospirillales;f__Rhodospirillaceae;g__Azospirillum;	0	3.85e-05	4.55e-05	0	0	0	0	0	2.86e-05	0	0	0	0	4.29e-05	3.63e-05	0	0	0	0	3.31e-05	0	0	0	9.88e-05	2.29e-05	4.48e-05	0	0	0	2.7e-05	0	0	0	6.16e-05	3.63e-05	0
k__Bacteria;p__Proteobacteria;c__Betaproteobacteria;o__Gallionellales;f__Gallionellaceae;g__Gallionella;	0	0	4.55e-05	0	0	0	0	0	0	0	5.44e-05	0	0	0	0	9.3e-05	8.55e-05	0	0	0	0	0	0	0	0	0	0	0	0	0	0	0	0	0	0	0
k__Bacteria;p__Proteobacteria;c__Gammaproteobacteria;o__Chromatiales;f__Ectothiorhodospiraceae;g__Thioalkalivibrio;	0	3.85e-05	0	0	0	0	0	0	0	0	0	0	0	0	3.63e-05	9.3e-05	8.55e-05	0	0	0	0	0	0	0	0	0	0	0	0	0	0	0	0	0	0	0
k__Bacteria;p__Proteobacteria;c__Deltaproteobacteria;o__Desulfobacterales;f__Desulfobulbaceae;g__Desulfotalea;	0	0	0	0	0	0	0	0	0	0	0	0	0	0	0	9.3e-05	0	0	2.48e-05	6.61e-05	0	0	0	0	9.17e-05	0	4.34e-05	0	0	5.4e-05	2.06e-05	0	2.32e-05	0	0	0
k__Bacteria;p__Nitrospirae;c__Nitrospira;o__Nitrospirales;f__Nitrospiraceae;g__JG37-AG-70;	0	0	0	0	0	0	0	0	0	0	0	0	0	0	0	9.3e-05	8.55e-05	0	0	0	0	0	0	0	2.29e-05	0	0	0	2.12e-05	0	0	0	2.32e-05	0	0	0
k__Bacteria;p__Bacteroidetes;c__Sphingobacteriia;o__Sphingobacteriales;f__Flexibacteraceae;g__Runella;	0	0	0	0	0	0	0	0	0	0	0	0	0	0	0	9.3e-05	0	0	0	0	0	0	0	0	0	0	0	0	0	0	4.11e-05	2.65e-05	0	0	0	0
k__Bacteria;p__Firmicutes;c__Bacilli;o__Bacillales;f__Thermoactinomycetaceae;g__Planifilum;	0	0	0	0	0	0	0	0	0	0	0	2.2e-05	0	0	0	0	0	0	0	0	7.75e-05	0	0	4.94e-05	2.29e-05	0	0	0	0	0	0	0	9.27e-05	0	3.63e-05	0
k__Bacteria;p__Bacteroidetes;c__Bacteroidia;o__Bacteroidales;f__Porphyromonadaceae;g__Dysgonomonas;	0	3.85e-05	9.09e-05	0	0	0	0	0	0	0	0	0	0	0	0	0	0	0	0	0	0	0	0	0	0	0	0	0	0	0	0	0	0	0	0	0
k__Bacteria;p__Bacteroidetes;c__Flavobacteriia;o__Flavobacteriales;f__Flavobacteriaceae;g__Zobellia;	0	0	0	0	0	0	0	0	0	0	5.44e-05	0	0	0	0	0	0	0	2.48e-05	0	0	9.02e-05	0	4.94e-05	0	6.72e-05	0	2.52e-05	0	0	2.06e-05	0	2.32e-05	6.16e-05	0	2.64e-05
k__Bacteria;p__Planctomycetes;c__[Brocadiae];o__Brocadiales;f__Brocadiaceae;g__Candidatus Brocadia;	0	0	0	0	0	0	0	0	0	0	0	0	0	0	0	0	0	0	0	0	0	0	0	0	0	0	8.68e-05	0	0	0	0	0	0	0	0	2.64e-05
k__Bacteria;p__Firmicutes;c__Bacilli;o__Bacillales;f__Paenibacillaceae;g__Ammoniphilus;	0	0	0	0	0	0	0	0	0	3.87e-05	0	0	0	8.59e-05	0	0	0	0	2.48e-05	0	3.87e-05	0	3.03e-05	2.47e-05	0	2.24e-05	0	2.52e-05	0	2.7e-05	0	0	2.32e-05	0	0	0
k__Bacteria;p__Actinobacteria;c__Actinobacteria;o__Actinomycetales;f__Kineosporiaceae;g__Kineococcus;	4.44e-05	7.7e-05	0	0	0	5.04e-05	0	0	0	3.87e-05	0	2.2e-05	0	8.59e-05	0	0	0	0	0	0	0	0	0	0	0	0	0	0	0	0	0	0	0	0	0	0
k__Bacteria;p__Tenericutes;c__Mollicutes;o__Acholeplasmatales;f__Acholeplasmataceae;g__Acholeplasma;	0	0	0	0	0	0	0	0	8.57e-05	0	0	2.2e-05	0	0	0	0	0	0	0	3.31e-05	0	0	3.03e-05	0	0	0	0	0	0	0	0	0	0	0	0	0
k__Archaea;p__Euryarchaeota;c__Methanomicrobia;o__Methanomicrobiales;f__Methanocorpusculaceae;g__Methanocorpusculum;	0	0	0	0	0	0	0	0	0	0	0	4.41e-05	0	0	0	0	8.55e-05	0	0	0	0	0	0	0	0	0	0	0	0	2.7e-05	0	2.65e-05	0	0	0	0
k__Bacteria;p__Proteobacteria;c__Gammaproteobacteria;o__Chromatiales;f__Halothiobacillaceae;g__Halothiobacillus;	0	0	0	0	0	0	0	0	0	0	0	0	0	0	0	0	0	2.43e-05	0	0	0	2.25e-05	0	0	0	0	0	2.52e-05	8.47e-05	0	0	0	2.32e-05	0	0	2.64e-05
k__Bacteria;p__Firmicutes;c__Clostridia;o__Coriobacteriales;f__Coriobacteriaceae;g__Eggerthella;	0	0	0	0	0	0	0	0	0	0	0	0	0	0	0	0	0	0	2.48e-05	0	0	2.25e-05	0	0	2.29e-05	0	4.34e-05	2.52e-05	2.12e-05	5.4e-05	8.23e-05	2.65e-05	2.32e-05	0	7.26e-05	0
k__Bacteria;p__Spirochaetes;c__[Leptospirae];o__[Leptospirales];f__Leptospiraceae;g__Leptospira;	0	0	0	0	0	0	0	0	0	0	0	0	0	0	0	0	0	0	0	0	0	0	0	0	0	0	0	0	0	8.1e-05	8.23e-05	0	0	0	0	0
k__Bacteria;p__Thermotogae;c__Thermotogae;o__Thermotogales;f__Thermotogaceae;g__Geotoga;	0	0	0	0	0	0	0	0	0	0	5.44e-05	0	0	0	0	0	0	0	0	0	0	0	3.03e-05	4.94e-05	6.88e-05	4.48e-05	0	0	2.12e-05	8.1e-05	2.06e-05	0	2.32e-05	3.08e-05	0	7.91e-05
k__Bacteria;p__Proteobacteria;c__Alphaproteobacteria;o__Rhizobiales;f__Hyphomicrobiaceae;g__Rhodobium;	0	0	0	0	0	0	0	0	0	0	0	0	8.05e-05	0	0	0	0	0	0	0	0	2.25e-05	0	0	0	2.24e-05	0	0	0	0	0	0	4.63e-05	3.08e-05	3.63e-05	0
k__Bacteria;p__Proteobacteria;c__Deltaproteobacteria;o__[Entotheonellales];f__[Entotheonellaceae];g__Candidatus Entotheonella;	0	0	0	0	0	0	0	0	0	0	0	0	0	0	0	0	0	0	2.48e-05	0	0	0	0	0	0	0	0	0	0	0	0	7.95e-05	0	0	0	0
k__Bacteria;p__Chlamydiae;c__Chlamydiia;o__Chlamydiales;f__Parachlamydiaceae;g__Candidatus Protochlamydia;	0	0	0	0	0	0	0	0	0	0	0	0	0	0	0	0	0	0	0	0	0	0	0	0	0	0	0	0	0	0	0	0	0	0	0	7.91e-05
k__Bacteria;p__Bacteroidetes;c__Flavobacteriia;o__Flavobacteriales;f__Flavobacteriaceae;g__Salinimicrobium;	0	0	0	0	0	0	7.81e-05	0	0	7.73e-05	5.44e-05	2.2e-05	0	0	0	0	0	0	0	0	0	0	0	0	0	0	0	0	0	0	2.06e-05	0	4.63e-05	0	3.63e-05	2.64e-05
k__Bacteria;p__Fusobacteria;c__Fusobacteria;o__Fusobacteriales;f__Fusobacteriaceae;g__Psychrilyobacter;	0	0	0	0	0	0	0	0	0	0	0	0	0	4.29e-05	0	0	0	4.85e-05	0	0	7.75e-05	0	0	0	2.29e-05	0	4.34e-05	0	0	0	0	2.65e-05	0	0	3.63e-05	0
k__Bacteria;p__Bacteroidetes;c__Flavobacteriia;o__Flavobacteriales;f__Flavobacteriaceae;g__Sejongia;	0	0	0	0	0	0	0	0	0	7.73e-05	0	0	0	0	0	0	0	0	0	0	3.87e-05	0	0	2.47e-05	6.88e-05	0	0	0	0	0	0	0	6.95e-05	0	0	0
k__Bacteria;p__Bacteroidetes;c__Sphingobacteriia;o__Sphingobacteriales;f__Ekhidnaceae;g__Ekhidna;	0	7.7e-05	0	0	0	0	0	2.25e-05	5.71e-05	3.87e-05	0	0	0	0	0	0	0	0	0	0	3.87e-05	0	0	0	0	0	0	0	2.12e-05	0	0	0	0	0	3.63e-05	0
k__Bacteria;p__Proteobacteria;c__Betaproteobacteria;o__Neisseriales;f__Neisseriaceae;g__Deefgea;	0	0	0	0	0	0	0	0	0	0	0	0	0	0	0	0	0	0	0	0	0	0	0	0	0	6.72e-05	2.17e-05	0	0	0	4.11e-05	0	0	3.08e-05	7.26e-05	2.64e-05
k__Bacteria;p__Firmicutes;c__Clostridia;o__Clostridiales;f__Clostridiaceae;g__Natronincola;	0	0	0	0	5.09e-05	0	0	0	0	0	0	0	0	0	7.26e-05	0	0	0	0	0	0	0	0	0	0	0	0	0	0	0	0	0	0	0	0	0
k__Bacteria;p__Bacteroidetes;c__Flavobacteriia;o__Flavobacteriales;f__Flavobacteriaceae;g__Capnocytophaga;	0	0	0	6.54e-05	0	5.04e-05	0	0	2.86e-05	0	5.44e-05	2.2e-05	0	4.29e-05	7.26e-05	0	0	0	0	6.61e-05	3.87e-05	0	0	0	0	0	4.34e-05	0	0	2.7e-05	2.06e-05	0	0	0	3.63e-05	0
k__Bacteria;p__Proteobacteria;c__Deltaproteobacteria;o__Desulfobacterales;f__Nitrospinaceae;g__GOUTA7;	0	3.85e-05	0	6.54e-05	0	0	0	0	2.86e-05	0	0	0	0	0	7.26e-05	0	0	0	0	0	0	0	0	0	0	0	0	0	0	0	0	0	0	0	0	0
k__Bacteria;p__Bacteroidetes;c__Sphingobacteriia;o__Sphingobacteriales;f__Amoebophilaceae;g__Candidatus Cardinium;	0	0	0	0	0	0	0	0	0	0	0	2.2e-05	0	0	7.26e-05	0	0	0	0	0	0	0	0	0	0	0	0	0	2.12e-05	0	0	0	0	0	0	0
k__Bacteria;p__Synergistetes;c__Synergistia;o__Synergistales;f__Synergistaceae;g__Synergistes;	0	0	0	0	0	0	0	0	0	0	0	0	0	0	0	0	0	0	0	0	0	0	0	0	6.88e-05	0	0	0	0	0	0	0	0	0	0	0
k__Bacteria;p__Bacteroidetes;c__Sphingobacteriia;o__Sphingobacteriales;f__Saprospiraceae;g__Aureispira;	0	0	0	6.54e-05	0	0	0	6.76e-05	2.86e-05	0	0	0	0	0	0	0	0	0	0	0	0	0	0	0	0	0	0	0	0	0	0	0	0	0	0	0
k__Bacteria;p__Deferribacteres;c__Deferribacteres;o__Deferribacterales;f__Deferribacteraceae;g__Flexistipes;	4.44e-05	0	0	0	0	0	0	6.76e-05	0	0	0	0	0	0	0	0	0	0	0	0	0	0	0	0	0	0	0	0	0	0	0	0	0	0	0	0
k__Bacteria;p__Firmicutes;c__Clostridia;o__Clostridiales;f__Carboxydocellaceae;g__Carboxydocella;	0	0	0	0	0	0	0	0	0	0	0	0	0	0	0	0	0	4.85e-05	2.48e-05	0	3.87e-05	6.76e-05	0	2.47e-05	0	6.72e-05	4.34e-05	2.52e-05	0	0	0	0	0	0	3.63e-05	2.64e-05
k__Bacteria;p__Actinobacteria;c__Actinobacteria;o__Actinomycetales;f__Streptosporangiaceae;g__Streptosporangium;	0	0	0	0	0	0	0	0	0	0	0	0	0	0	0	0	0	0	0	6.61e-05	0	0	0	2.47e-05	0	0	0	0	0	0	0	5.3e-05	0	0	0	0
k__Bacteria;p__Proteobacteria;c__Betaproteobacteria;o__Neisseriales;f__Neisseriaceae;g__Kingella;	0	0	0	0	0	0	0	0	0	0	0	0	0	0	0	0	0	0	0	6.61e-05	3.87e-05	0	0	0	0	0	2.17e-05	2.52e-05	0	2.7e-05	0	0	4.63e-05	0	3.63e-05	2.64e-05
k__Bacteria;p__Proteobacteria;c__Gammaproteobacteria;o__Alteromonadales;f__Idiomarinaceae;g__Pseudidiomarina;	0	3.85e-05	0	0	0	0	0	0	0	3.87e-05	0	6.61e-05	0	0	3.63e-05	0	0	0	0	3.31e-05	0	0	0	0	0	0	2.17e-05	0	0	0	0	0	0	0	0	0
k__Bacteria;p__Bacteroidetes;c__Flavobacteriia;o__Flavobacteriales;f__Flavobacteriaceae;g__Winogradskyella;	0	0	0	6.54e-05	0	5.04e-05	0	0	0	0	0	0	0	0	0	0	0	0	0	0	0	0	0	0	2.29e-05	2.24e-05	6.51e-05	0	4.24e-05	2.7e-05	0	0	0	0	0	0
k__Bacteria;p__Bacteroidetes;c__Flavobacteriia;o__Flavobacteriales;f__Flavobacteriaceae;g__Aequorivita;	0	0	0	0	0	0	0	0	0	0	0	0	0	0	0	0	0	0	0	0	3.87e-05	0	3.03e-05	2.47e-05	0	0	6.51e-05	0	0	5.4e-05	0	0	0	0	0	2.64e-05
k__Archaea;p__Euryarchaeota;c__Halobacteria;o__Halobacteriales;f__Halobacteriaceae;g__Halococcus;	0	0	0	0	0	0	0	0	0	0	0	0	0	0	0	0	0	0	0	0	0	0	0	0	0	0	6.51e-05	0	0	0	0	0	0	0	0	0
k__Bacteria;p__Firmicutes;c__Clostridia;o__Natranaerobiales;f__Anaerobrancaceae;g__Dethiobacter;	0	0	0	0	0	0	0	0	0	0	0	0	0	0	0	0	0	2.43e-05	0	0	0	0	0	0	0	0	0	0	6.36e-05	0	0	0	0	0	0	0
k__Bacteria;p__Actinobacteria;c__Actinobacteria;o__Actinomycetales;f__Micromonosporaceae;g__Pilimelia;	0	0	0	0	0	0	0	0	0	0	0	0	0	0	0	0	0	0	2.48e-05	0	0	0	0	0	0	0	0	0	6.36e-05	0	0	0	0	0	0	0
k__Bacteria;p__Proteobacteria;c__Alphaproteobacteria;o__Rhodospirillales;f__Acetobacteraceae;g__Gluconobacter;	0	0	0	0	0	0	0	0	0	0	0	0	0	4.29e-05	0	0	0	0	0	3.31e-05	0	0	0	0	4.59e-05	2.24e-05	0	0	2.12e-05	0	2.06e-05	0	0	6.16e-05	3.63e-05	0
k__Bacteria;p__Proteobacteria;c__Gammaproteobacteria;o__Alteromonadales;f__Alteromonadaceae;g__Marinimicrobium;	0	0	0	0	0	0	0	0	0	0	0	0	0	0	0	0	0	0	0	0	0	0	6.06e-05	2.47e-05	0	2.24e-05	0	0	0	0	0	0	0	0	3.63e-05	5.27e-05
k__Bacteria;p__Firmicutes;c__Clostridia;o__Clostridiales;f__Clostridiaceae;g__Thermoanaerobacterium;	0	0	0	0	0	0	0	0	0	0	0	0	0	0	0	0	0	0	0	0	3.87e-05	0	6.06e-05	0	0	0	0	0	0	2.7e-05	4.11e-05	0	0	0	0	0
k__Bacteria;p__Firmicutes;c__Clostridia;o__Clostridiales;f__Peptococcaceae;g__Desulfosporosinus;	0	0	0	0	0	0	0	0	2.86e-05	0	5.44e-05	2.2e-05	0	0	3.63e-05	0	0	0	0	0	0	0	0	0	2.29e-05	0	0	0	0	0	0	0	0	3.08e-05	0	2.64e-05
k__Bacteria;p__Proteobacteria;c__Gammaproteobacteria;o__Chromatiales;f__Chromatiaceae;g__Allochromatium;	4.44e-05	0	0	0	0	0	3.9e-05	0	0	3.87e-05	5.44e-05	4.41e-05	0	0	0	0	0	0	0	0	0	0	0	0	0	0	0	0	0	0	0	0	0	0	0	0
k__Bacteria;p__Cyanobacteria;c__Synechococcophycideae;o__Pseudanabaenales;f__Pseudanabaenaceae;g__Halomicronema;	0	0	0	0	0	0	0	0	0	0	0	0	0	0	0	0	0	0	0	0	0	0	0	0	0	0	0	0	0	5.4e-05	2.06e-05	0	0	0	0	0
k__Bacteria;p__Actinobacteria;c__Actinobacteria;o__Bifidobacteriales;f__Bifidobacteriaceae;g__Scardovia;	0	0	0	0	0	0	0	0	0	0	0	0	0	0	0	0	0	0	0	0	0	0	0	0	2.29e-05	0	0	0	0	2.7e-05	2.06e-05	5.3e-05	4.63e-05	0	3.63e-05	0
k__Bacteria;p__Proteobacteria;c__Deltaproteobacteria;o__Syntrophobacterales;f__Desulfobacteraceae;g__Desulfofaba;	0	0	0	0	0	0	0	0	0	0	0	0	0	0	0	0	0	0	0	0	0	0	0	0	0	0	0	0	0	0	0	0	0	0	0	5.27e-05
k__Archaea;p__Euryarchaeota;c__Halobacteria;o__Halobacteriales;f__Halobacteriaceae;g__Halosimplex;	0	0	0	0	0	0	0	0	0	0	0	0	0	0	0	0	0	0	0	0	0	0	0	0	0	0	0	0	2.12e-05	0	0	0	0	0	0	5.27e-05
k__Bacteria;p__Firmicutes;c__Clostridia;o__Clostridiales;f__Lachnospiraceae;g__Catonella;	0	0	0	0	5.09e-05	0	0	0	0	0	0	0	0	0	0	0	0	4.85e-05	0	0	0	0	3.03e-05	0	0	0	0	0	0	0	0	2.65e-05	0	0	0	0
k__Bacteria;p__Synergistetes;c__Synergistia;o__Synergistales;f__Dethiosulfovibrionaceae;g__Aminobacterium;	0	0	0	0	0	5.04e-05	0	0	0	3.87e-05	0	0	0	0	0	0	0	0	0	3.31e-05	0	0	0	0	0	0	0	0	0	2.7e-05	0	0	0	0	0	0
k__Bacteria;p__Proteobacteria;c__Gammaproteobacteria;o__Legionellales;f__Legionellaceae;g__Tatlockia;	0	0	0	0	0	0	0	0	0	0	0	0	0	0	0	0	0	4.85e-05	2.48e-05	0	0	0	0	0	0	0	0	0	0	0	0	0	0	3.08e-05	0	2.64e-05
k__Bacteria;p__Proteobacteria;c__Betaproteobacteria;o__Burkholderiales;f__Oxalobacteraceae;g__Herminiimonas;	4.44e-05	0	0	0	0	0	0	0	0	0	0	2.2e-05	0	4.29e-05	0	0	4.28e-05	0	0	0	0	0	0	0	4.59e-05	0	0	0	0	0	0	0	0	0	0	2.64e-05
k__Bacteria;p__Bacteroidetes;c__Sphingobacteriia;o__Sphingobacteriales;f__Flexibacteraceae;g__Microscilla;	0	0	0	0	0	0	0	0	0	0	0	0	0	0	0	0	0	0	0	0	0	0	0	0	4.59e-05	0	0	0	0	0	0	0	0	0	0	0
k__Bacteria;p__Proteobacteria;c__Gammaproteobacteria;o__Alteromonadales;f__Alteromonadaceae;g__nsmpVI18;	0	0	4.55e-05	0	0	0	0	0	0	0	0	0	0	0	0	0	0	2.43e-05	0	0	0	0	0	0	0	0	0	0	0	0	0	0	0	3.08e-05	0	0
k__Bacteria;p__Firmicutes;c__Clostridia;o__Clostridiales;f__Peptococcaceae;g__Desulfitobacterium;	0	3.85e-05	4.55e-05	0	0	0	0	0	2.86e-05	0	0	0	0	0	3.63e-05	0	0	0	0	0	0	0	0	0	0	0	0	0	0	2.7e-05	0	0	0	0	0	0
k__Bacteria;p__Proteobacteria;c__Alphaproteobacteria;o__Rhodospirillales;f__Rhodospirillaceae;g__Telmatospirillum;	0	0	0	0	0	0	0	4.51e-05	2.86e-05	0	0	0	0	0	0	0	0	0	0	0	0	0	0	0	0	0	0	0	0	0	0	0	0	0	0	0
k__Bacteria;p__Tenericutes;c__Mollicutes;o__Anaeroplasmatales;f__Anaeroplasmataceae;g__Anaeroplasma;	0	0	0	0	0	0	0	0	0	0	0	0	0	0	0	0	0	0	0	0	0	4.51e-05	0	0	0	0	0	0	0	0	0	0	0	0	0	0
k__Bacteria;p__Actinobacteria;c__Nitriliruptoria;o__Nitriliruptorales;f__Nitriliruptoraceae;g__Nitriliruptor;	0	0	0	0	0	0	0	0	0	0	0	0	0	0	0	0	0	2.43e-05	0	0	0	4.51e-05	0	0	0	0	0	2.52e-05	0	2.7e-05	2.06e-05	0	0	0	0	0
k__Bacteria;p__Firmicutes;c__Clostridia;o__Clostridiales;f__Peptostreptococcaceae;g__Tepidibacter;	0	0	0	0	0	0	0	0	0	0	0	0	0	0	0	0	0	2.43e-05	0	0	3.87e-05	0	0	0	0	4.48e-05	2.17e-05	0	0	0	0	0	2.32e-05	0	0	2.64e-05
k__Bacteria;p__Proteobacteria;c__Gammaproteobacteria;o__Legionellales;f__Legionellaceae;g__Legionella;	4.44e-05	0	0	0	0	0	0	0	0	0	0	4.41e-05	0	4.29e-05	0	0	0	0	0	3.31e-05	3.87e-05	0	0	0	0	0	0	0	0	0	0	0	2.32e-05	0	0	2.64e-05
k__Bacteria;p__Proteobacteria;c__Gammaproteobacteria;o__Alteromonadales;f__Alteromonadaceae;g__BD2-13;	0	0	0	0	0	0	0	0	0	0	0	4.41e-05	0	0	3.63e-05	0	0	0	0	0	0	0	0	0	0	0	0	0	0	2.7e-05	0	0	0	0	0	0
k__Bacteria;p__Verrucomicrobia;c__[Spartobacteria];o__[Chthoniobacterales];f__[Chthoniobacteraceae];g__OR-59;	0	0	0	0	0	0	0	0	0	0	0	4.41e-05	0	0	0	0	0	0	0	0	0	0	0	0	0	0	0	0	0	0	0	0	0	0	0	0
k__Bacteria;p__Bacteroidetes;c__Flavobacteriia;o__Flavobacteriales;f__Flavobacteriaceae;g__Elizabethkingia;	0	0	0	0	0	0	0	0	0	0	0	0	0	0	0	0	0	0	0	3.31e-05	0	0	0	0	0	0	4.34e-05	0	0	0	0	2.65e-05	0	0	0	2.64e-05
k__Bacteria;p__Planctomycetes;c__[Brocadiae];o__Brocadiales;f__Brocadiaceae;g__Candidatus Scalindua;	0	0	0	0	0	0	0	0	0	0	0	0	0	0	3.63e-05	0	0	0	0	0	0	0	0	0	0	0	4.34e-05	0	0	0	0	0	0	0	0	0
k__Bacteria;p__Acidobacteria;c__Acidobacteria;o__Acidobacteriales;f__Acidobacteriaceae;g__Terriglobus;	0	0	0	0	0	0	0	0	0	0	0	0	0	4.29e-05	3.63e-05	0	0	0	0	0	0	0	0	0	0	0	0	0	0	0	0	0	2.32e-05	0	0	0
k__Bacteria;p__Proteobacteria;c__Gammaproteobacteria;o__Pseudomonadales;f__Moraxellaceae;g__Moraxella;	0	0	0	0	0	0	0	0	0	0	0	0	0	4.29e-05	0	0	0	0	0	3.31e-05	0	0	0	0	0	2.24e-05	0	0	0	0	0	0	0	0	0	0
k__Bacteria;p__Firmicutes;c__Bacilli;o__Lactobacillales;f__Carnobacteriaceae;g__Desemzia;	0	0	0	0	0	0	0	0	0	0	0	0	0	4.29e-05	0	0	0	0	0	0	0	0	0	0	0	0	2.17e-05	0	0	0	2.06e-05	0	0	0	0	0
k__Bacteria;p__Firmicutes;c__Bacilli;o__Bacillales;f__Planococcaceae;g__Rummeliibacillus;	0	0	0	0	0	0	0	0	0	0	0	0	0	0	3.63e-05	0	4.28e-05	0	2.48e-05	0	0	0	0	0	0	0	0	0	0	0	0	0	0	0	0	0
k__Bacteria;p__Bacteroidetes;c__Sphingobacteriia;o__Sphingobacteriales;f__Saprospiraceae;g__Haliscomenobacter;	0	0	0	0	0	0	0	0	0	0	0	0	0	0	0	0	4.28e-05	0	0	0	0	0	0	0	0	0	0	0	0	2.7e-05	2.06e-05	0	0	0	0	2.64e-05
k__Bacteria;p__Synergistetes;c__Synergistia;o__Synergistales;f__Aminiphilaceae;g__Aminiphilus;	0	0	0	0	0	0	0	0	0	0	0	0	0	0	0	0	0	0	0	0	0	0	0	0	0	0	0	0	4.24e-05	0	0	0	0	3.08e-05	0	0
k__Bacteria;p__Firmicutes;c__Erysipelotrichi;o__Erysipelotrichales;f__Erysipelotrichaceae;g__Erysipelothrix;	0	0	0	0	0	0	0	0	0	0	0	0	0	0	0	0	0	0	0	0	0	0	0	2.47e-05	2.29e-05	0	0	0	4.24e-05	0	0	2.65e-05	0	3.08e-05	0	0
k__Bacteria;p__Proteobacteria;c__Deltaproteobacteria;o__Myxococcales;f__Polyangiaceae;g__Sorangium;	0	0	0	0	0	0	0	0	0	0	0	0	0	0	0	0	0	0	2.48e-05	3.31e-05	0	2.25e-05	0	0	0	0	0	0	4.24e-05	0	2.06e-05	0	0	0	0	0
k__Bacteria;p__Bacteroidetes;c__Flavobacteriia;o__Flavobacteriales;f__Flavobacteriaceae;g__Myroides;	0	0	0	0	0	0	0	0	0	0	0	0	0	0	0	0	0	0	0	0	0	0	0	0	0	0	0	0	0	0	4.11e-05	0	0	0	0	0
k__Bacteria;p__Firmicutes;c__Clostridia;o__Halanaerobiales;f__Halanaerobiaceae;g__Halanaerobium;	0	0	0	0	0	0	3.9e-05	0	0	0	0	2.2e-05	0	0	3.63e-05	0	0	0	0	0	0	0	3.03e-05	0	0	0	0	0	0	0	0	0	0	0	0	0
k__Bacteria;p__Firmicutes;c__Clostridia;o__Clostridiales;f__Clostridiaceae;g__Mogibacterium;	0	0	0	0	0	0	0	0	0	0	0	0	0	0	0	0	0	0	0	3.31e-05	3.87e-05	0	0	0	0	0	0	0	0	2.7e-05	0	0	0	0	3.63e-05	0
k__Bacteria;p__Firmicutes;c__Clostridia;o__Clostridiales;f__Peptostreptococcaceae;g__Clostridium;	0	0	0	0	0	0	0	2.25e-05	2.86e-05	3.87e-05	0	0	0	0	3.63e-05	0	0	0	0	0	0	0	0	0	0	0	2.17e-05	0	0	0	0	0	0	0	0	0
k__Bacteria;p__Proteobacteria;c__Gammaproteobacteria;o__Pasteurellales;f__Pasteurellaceae;g__Gallibacterium;	0	3.85e-05	0	0	0	0	0	0	0	0	0	0	0	0	0	0	0	0	0	0	0	0	0	2.47e-05	0	0	0	0	0	2.7e-05	0	0	2.32e-05	0	0	0
k__Bacteria;p__Firmicutes;c__Clostridia;o__Clostridiales;f__Peptostreptococcaceae;g__Filifactor;	0	0	0	0	0	0	0	0	0	0	0	0	0	0	3.63e-05	0	0	0	0	0	0	0	0	0	2.29e-05	0	0	0	2.12e-05	0	0	0	0	0	0	0
k__Archaea;p__Euryarchaeota;c__Halobacteria;o__Halobacteriales;f__Halobacteriaceae;g__Haloarcula;	0	0	0	0	0	0	0	0	0	0	0	0	0	0	3.63e-05	0	0	0	0	0	0	0	0	0	0	2.24e-05	0	0	0	0	0	0	0	0	0	0
k__Bacteria;p__Actinobacteria;c__Actinobacteria;o__Actinomycetales;f__Nocardioidaceae;g__Actinopolymorpha;	0	0	0	0	0	0	0	0	0	0	0	0	0	0	0	0	0	0	0	3.31e-05	0	2.25e-05	0	0	0	0	0	0	0	0	0	0	0	0	0	0
k__Bacteria;p__Proteobacteria;c__Deltaproteobacteria;o__Syntrophobacterales;f__Desulfobacteraceae;g__Desulfobacter;	0	0	0	0	0	0	0	0	0	0	0	0	0	0	0	0	0	0	0	3.31e-05	0	0	0	0	0	0	0	0	2.12e-05	0	0	0	0	0	0	2.64e-05
k__Bacteria;p__Firmicutes;c__Bacilli;o__Bacillales;f__Thermoactinomycetaceae;g__Shimazuella;	0	0	0	0	0	0	0	0	0	0	0	0	0	0	0	0	0	0	0	3.31e-05	0	0	0	0	0	0	0	0	0	0	2.06e-05	0	0	0	0	0
k__Bacteria;p__Proteobacteria;c__Gammaproteobacteria;o__Alteromonadales;f__Alteromonadaceae;g__Teredinibacter;	0	0	0	0	0	0	0	0	0	0	0	0	0	0	0	0	0	0	0	0	0	0	3.03e-05	0	0	0	0	0	0	0	0	0	0	3.08e-05	0	0
k__Bacteria;p__Firmicutes;c__Clostridia;o__Clostridiales;f__Peptococcaceae;g__SJA-118;	0	0	0	0	0	0	0	0	0	0	0	0	0	0	0	0	0	2.43e-05	0	0	0	0	3.03e-05	0	2.29e-05	0	0	0	0	0	0	0	2.32e-05	0	0	0
k__Bacteria;p__Bacteroidetes;c__Flavobacteriia;o__Flavobacteriales;f__Flavobacteriaceae;g__Gramella;	0	0	0	0	0	0	0	0	0	0	0	0	0	0	0	0	0	0	0	0	0	0	3.03e-05	0	0	0	2.17e-05	2.52e-05	0	2.7e-05	0	0	0	0	0	2.64e-05
k__Bacteria;p__Proteobacteria;c__Epsilonproteobacteria;o__Campylobacterales;f__Helicobacteraceae;g__Flexispira;	0	0	0	0	0	0	0	0	0	0	0	0	0	0	0	0	0	0	0	0	0	0	0	0	0	0	2.17e-05	0	0	2.7e-05	0	0	0	0	0	2.64e-05
k__Bacteria;p__Firmicutes;c__Bacilli;o__Lactobacillales;f__Leuconostocaceae;g__Fructobacillus;	0	0	0	0	0	0	0	0	0	0	0	0	0	0	0	0	0	0	0	0	0	0	0	0	2.29e-05	0	0	0	0	2.7e-05	0	0	0	0	0	0
k__Bacteria;p__Firmicutes;c__Erysipelotrichi;o__Erysipelotrichales;f__Erysipelotrichaceae;g__cc_115;	0	0	0	0	0	0	0	0	0	0	0	0	0	0	0	0	0	0	2.48e-05	0	0	0	0	0	0	0	0	0	0	0	0	0	0	0	0	2.64e-05
k__Bacteria;p__Thermotogae;c__Thermotogae;o__Thermotogales;f__Thermotogaceae;g__S1;	0	0	0	0	0	0	0	0	0	0	0	0	0	0	0	0	0	0	0	0	0	0	0	0	0	0	0	0	2.12e-05	0	0	0	0	0	0	2.64e-05
k__Bacteria;p__Proteobacteria;c__Gammaproteobacteria;o__Oceanospirillales;f__Saccharospirillaceae;g__Reinekea;	0	0	0	0	0	0	0	0	0	0	0	0	0	0	0	0	0	0	0	0	0	0	0	0	0	0	0	2.52e-05	0	0	0	0	2.32e-05	0	0	2.64e-05
k__Bacteria;p__Proteobacteria;c__Betaproteobacteria;o__Burkholderiales;f__Alcaligenaceae;g__Oligella;	0	0	0	0	0	0	0	0	0	0	0	0	0	0	0	0	0	0	0	0	0	2.25e-05	0	0	0	2.24e-05	2.17e-05	2.52e-05	0	0	0	0	0	0	0	0
k__Bacteria;p__Tenericutes;c__Mollicutes;o__Anaeroplasmatales;f__Anaeroplasmataceae;g__Asteroleplasma;	0	0	0	0	0	0	0	0	0	0	0	0	0	0	0	0	0	0	2.48e-05	0	0	0	0	0	0	0	0	0	0	0	0	0	2.32e-05	0	0	0
k__Bacteria;p__Proteobacteria;c__Gammaproteobacteria;o__Methylococcales;f__Methylococcaceae;g__Methylomicrobium;	0	0	0	0	0	0	0	0	0	0	0	0	0	0	0	0	0	0	0	0	0	0	0	0	0	0	2.17e-05	0	0	0	0	0	2.32e-05	0	0	0
k__Bacteria;p__Planctomycetes;c__Planctomycetia;o__Pirellulales;f__Pirellulaceae;g__A17;	0	0	0	0	0	0	0	0	0	0	0	0	0	0	0	0	0	0	0	0	0	0	0	0	0	0	2.17e-05	0	0	0	2.06e-05	0	0	0	0	0
Others	0.597578	0.587311	0.650646	0.551812	0.748204	0.612114	0.665847	0.698131	0.626217	0.483068	0.628935	0.564377	0.576923	0.509252	0.576612	0.547838	0.314646	0.352439	0.323054	0.453872	0.342902	0.618869	0.469508	0.407437	0.411233	0.32751	0.400478	0.40829	0.446742	0.514055	0.386563	0.502585	0.437503	0.411292	0.430606	0.454409
